# Supplementary material for: Beyond simple hetero Diels–Alder cycloadditions. A new type of element–ligand cooperativity at N,C,N-coordinated arsinidene and stibinidene centres in the reaction with an electron-deficient alkyne
Source: Royal Society of Chemistry journal article supplement (doi:10.1039/d2dt02499c), 2022-01-01
Supplement: d2dt02499c1.pdf [file d2dt02499c1.pdf]

ESI for:

**Beyond simple hetero Diels-Alder Cycloadditions. A New Type of Element-Ligand Cooperativity at *N,C,N*-coordinated Arsinidene and Stibinidene Centres in the Reaction with Electron Deficient Alkyne.**

J. Zechovský, V. Kremláček, M. Erben, M. Hejda, E. Rychagova, A. Růžička, R. Jambor, S. Ketkov\* and L. Dostál\*

\*E-mails: libor.dostal@upce.cz (L.D.), sketkov@iomc.ras.ru (S.K.)

**Table of contents:**

|                                                               |                |
|---------------------------------------------------------------|----------------|
| 1) NMR spectra of studied compounds, synthesis of <b>2-Bi</b> | <b>S2-S25</b>  |
| 2) Crystallographic data for studied compounds                | <b>S26-S28</b> |
| 3) IR and Raman spectra                                       | <b>S29-S34</b> |
| 4) Theoretical study                                          | <b>S35-S76</b> |

# 1) NMR spectra of studied compounds.

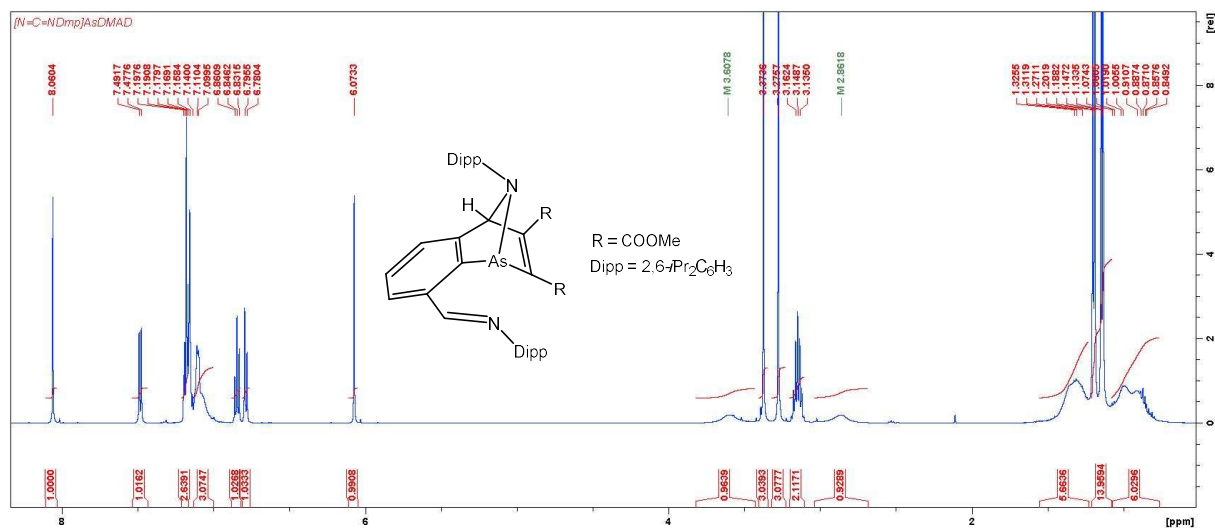

**Figure S1:  $^1\text{H}$  NMR spectrum of 2-As in  $\text{C}_6\text{D}_6$  (500 MHz).**

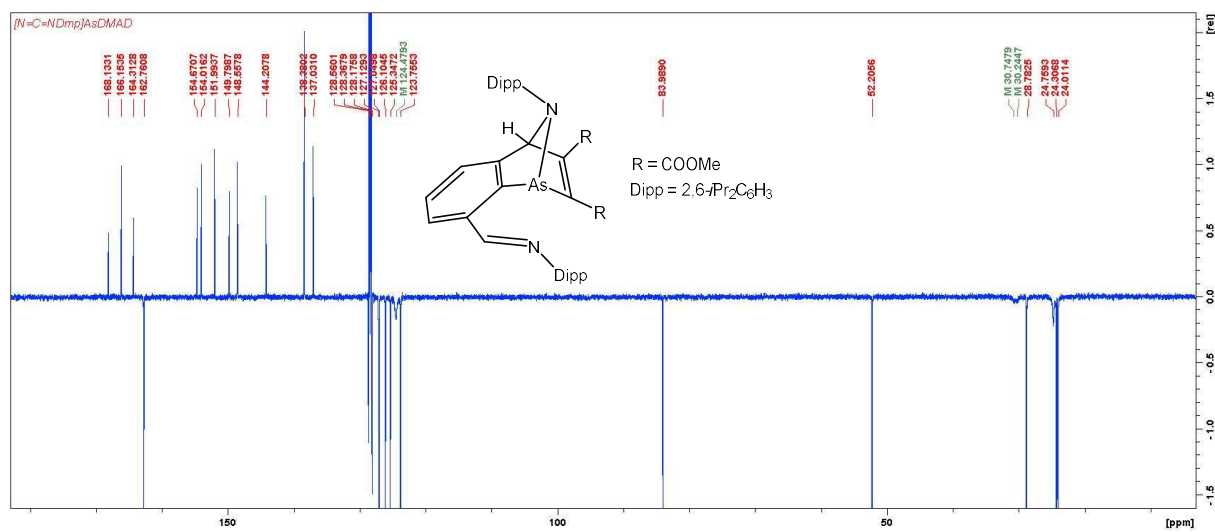

**Figure S2:  $^{13}\text{C}\{^1\text{H}\}$  NMR spectrum of 2-As in  $\text{C}_6\text{D}_6$  (125.6 MHz).**

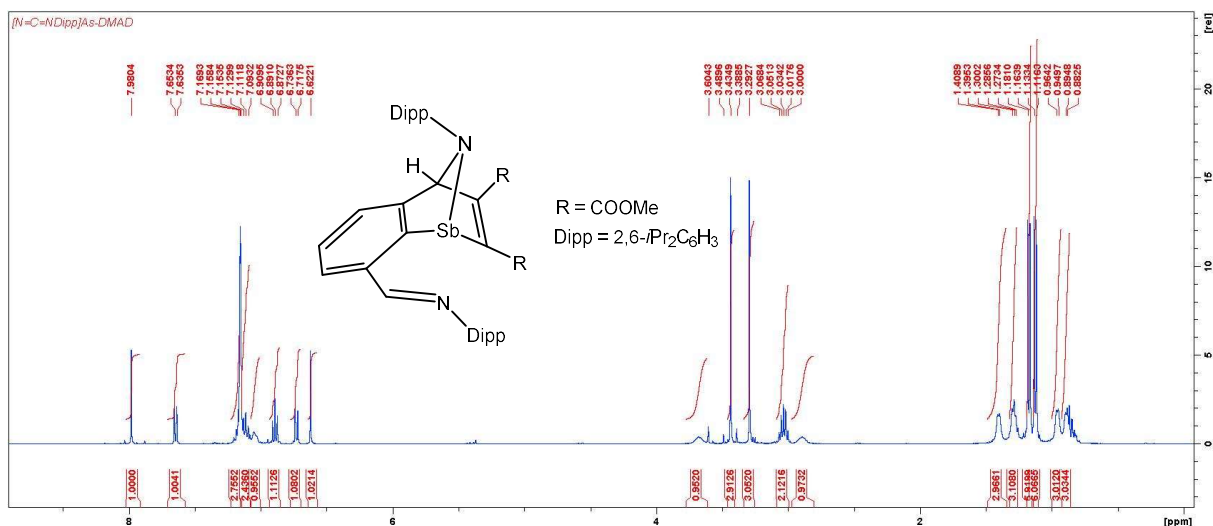

**Figure S3:  $^1\text{H}$  NMR spectrum of 2-Sb in  $\text{C}_6\text{D}_6$  (400 MHz).**

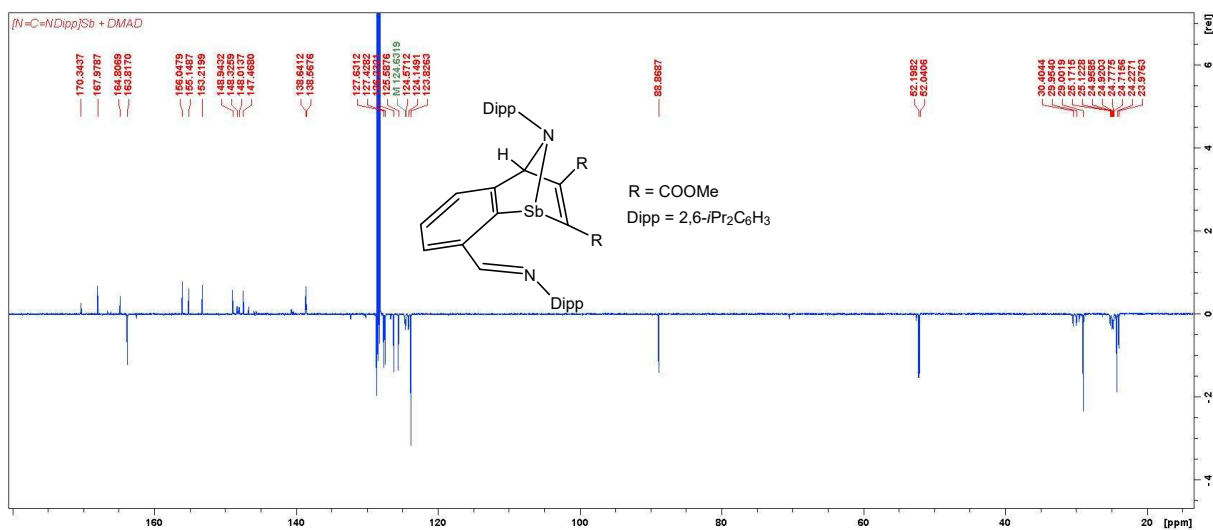

**Figure S4:  $^{13}\text{C}\{^1\text{H}\}$  NMR spectrum of 2-Sb in  $\text{C}_6\text{D}_6$  (125.6 MHz).**

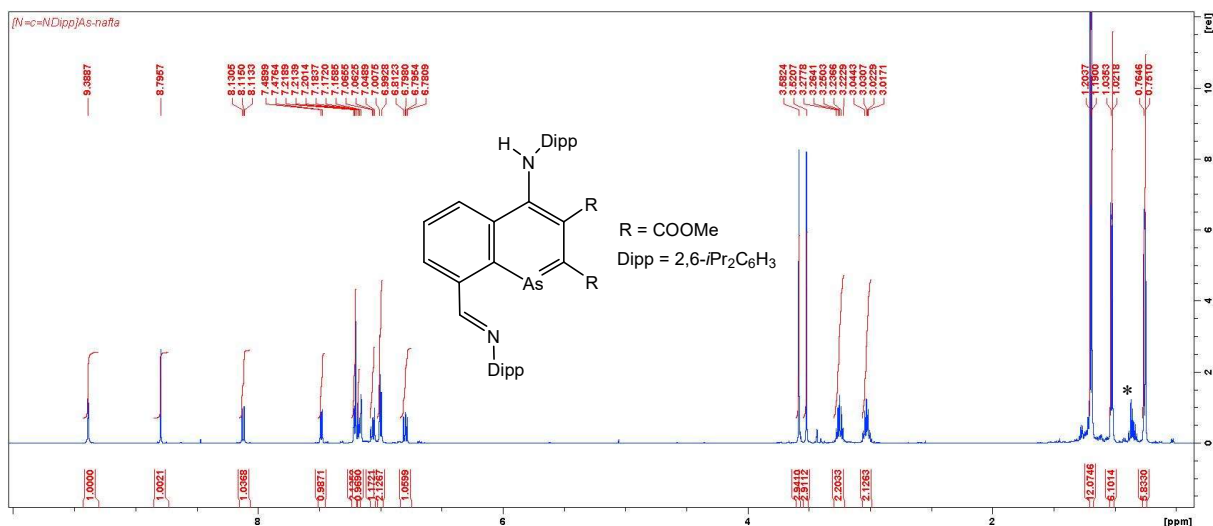

**Figure S5:  $^1\text{H}$  NMR spectrum of **3-As** in  $\text{C}_6\text{D}_6$  (500 MHz). \*denotes traces of hexane solvent.**

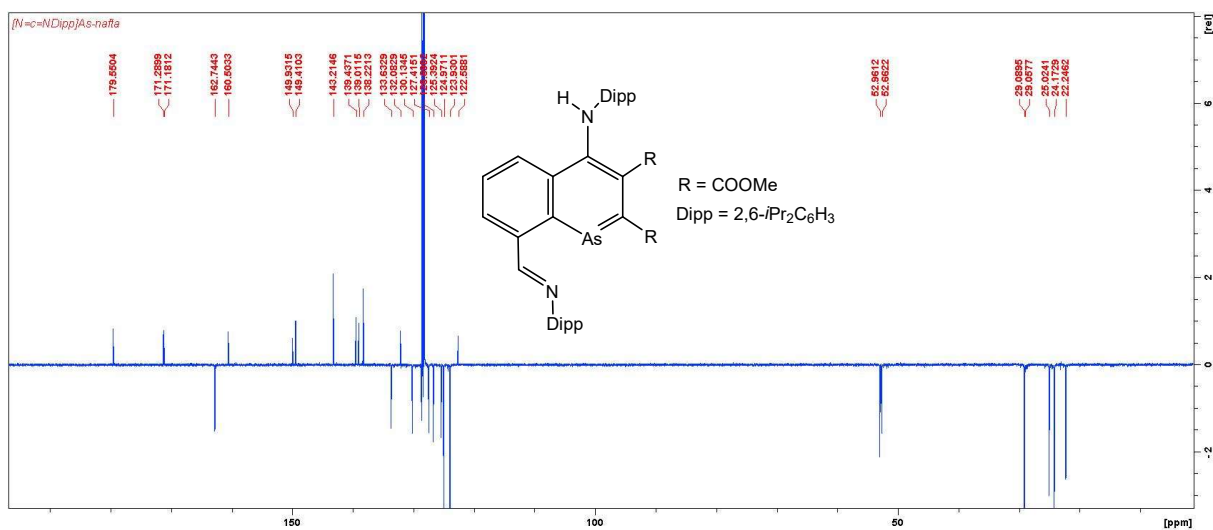

**Figure S6:  $^{13}\text{C}\{^1\text{H}\}$  NMR spectrum of **3-As** in  $\text{C}_6\text{D}_6$  (125.6 MHz).**







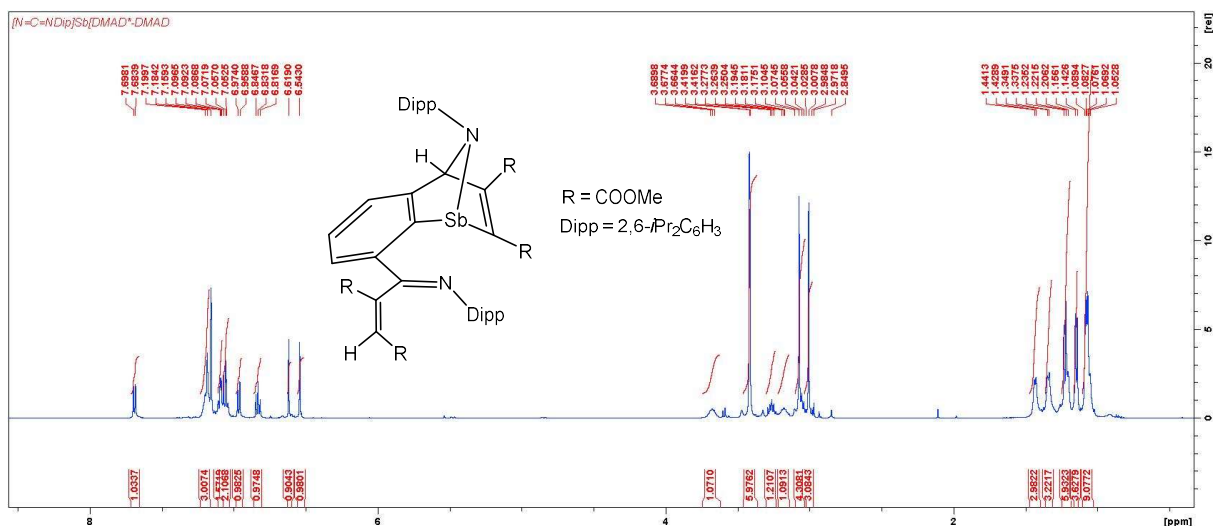

**Figure S13: <sup>1</sup>H NMR spectrum of 5-Sb in C<sub>6</sub>D<sub>6</sub> (500 MHz).**

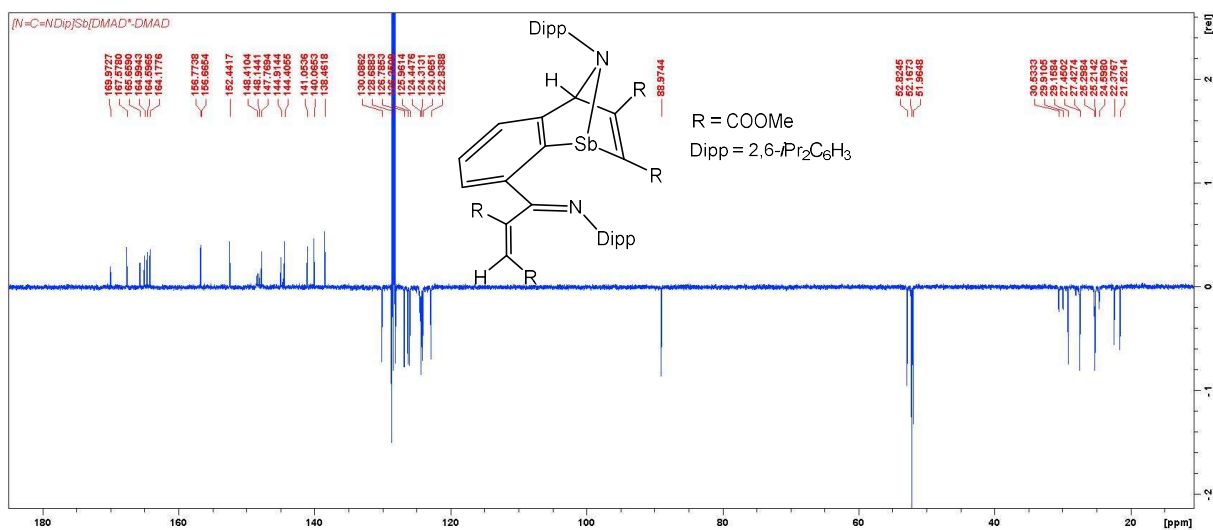

**Figure S14: <sup>13</sup>C NMR spectrum of 5-Sb in C<sub>6</sub>D<sub>6</sub> (500 MHz).**



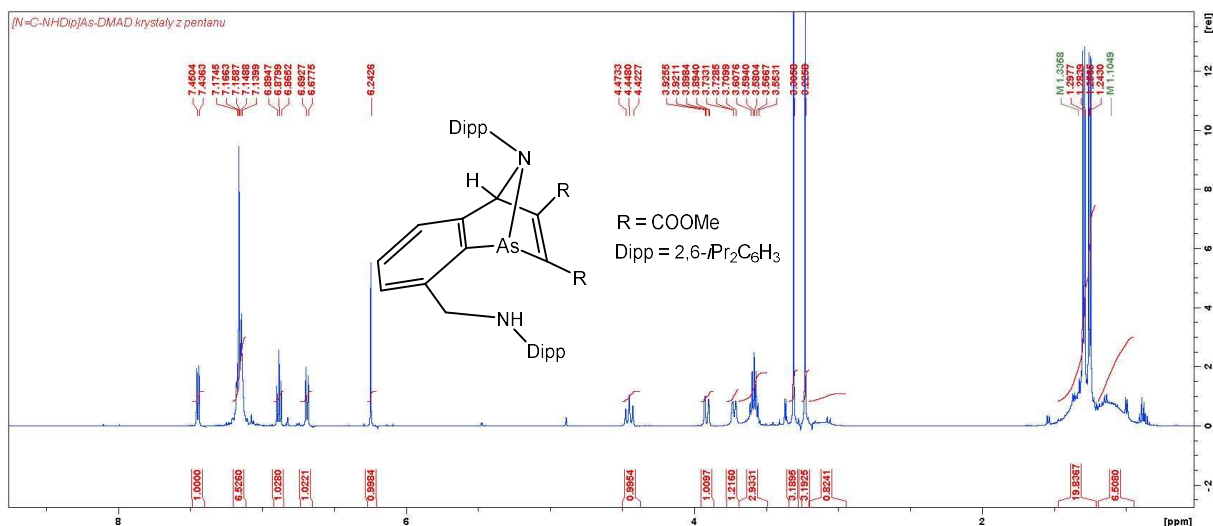

Figure S15: <sup>1</sup>H NMR spectrum of 7-As in C<sub>6</sub>D<sub>6</sub> (500 MHz).

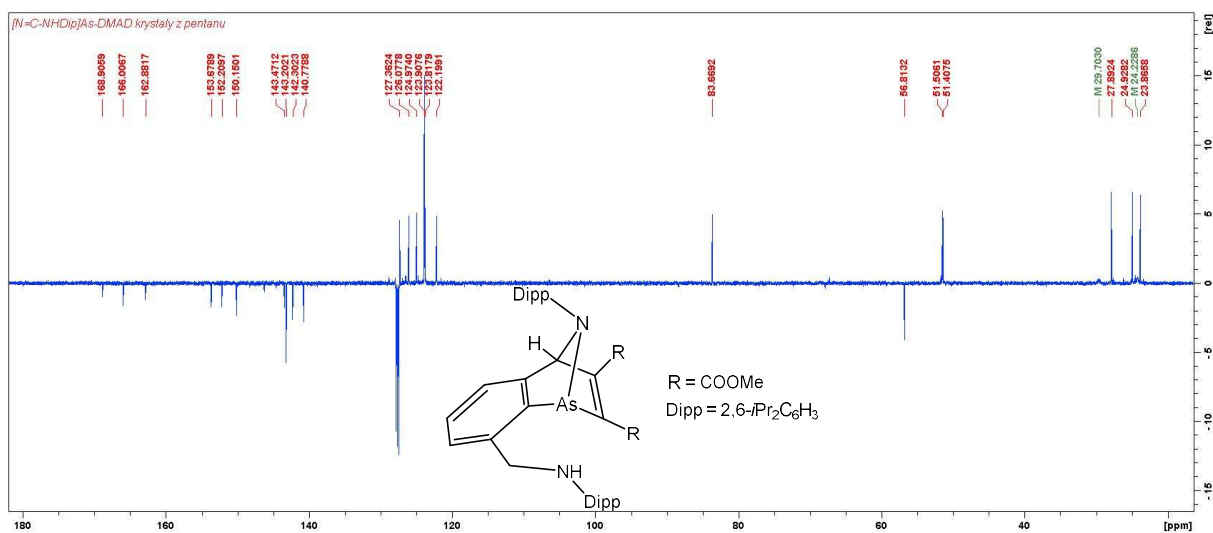

Figure S16: <sup>13</sup>C{<sup>1</sup>H} NMR spectrum of 7-As in C<sub>6</sub>D<sub>6</sub> (125.6 MHz).



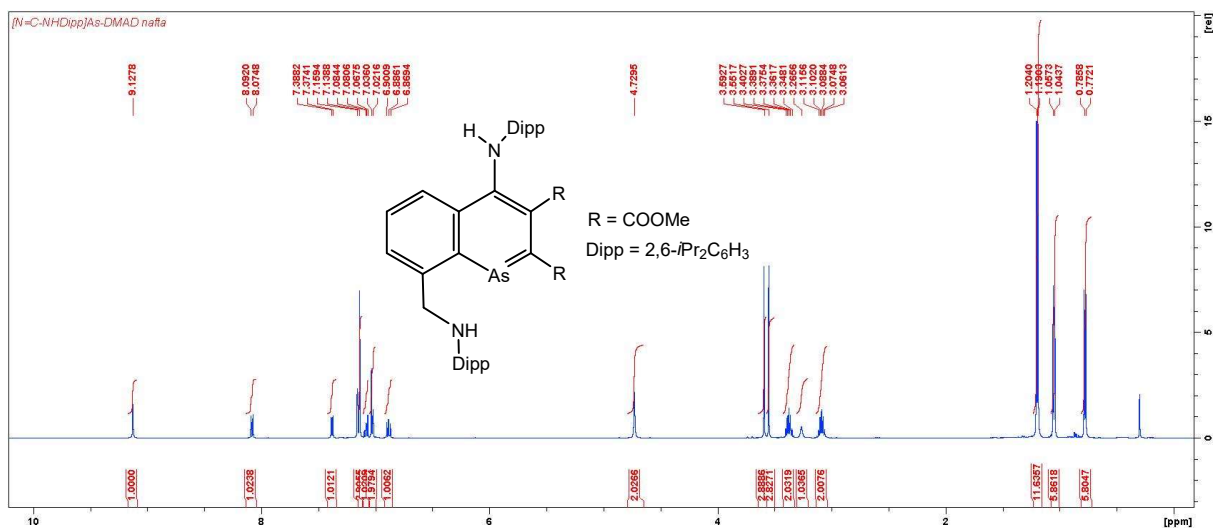

Figure S19:  $^1\text{H}$  NMR spectrum of **8-As** in  $\text{C}_6\text{D}_6$  (500 MHz).

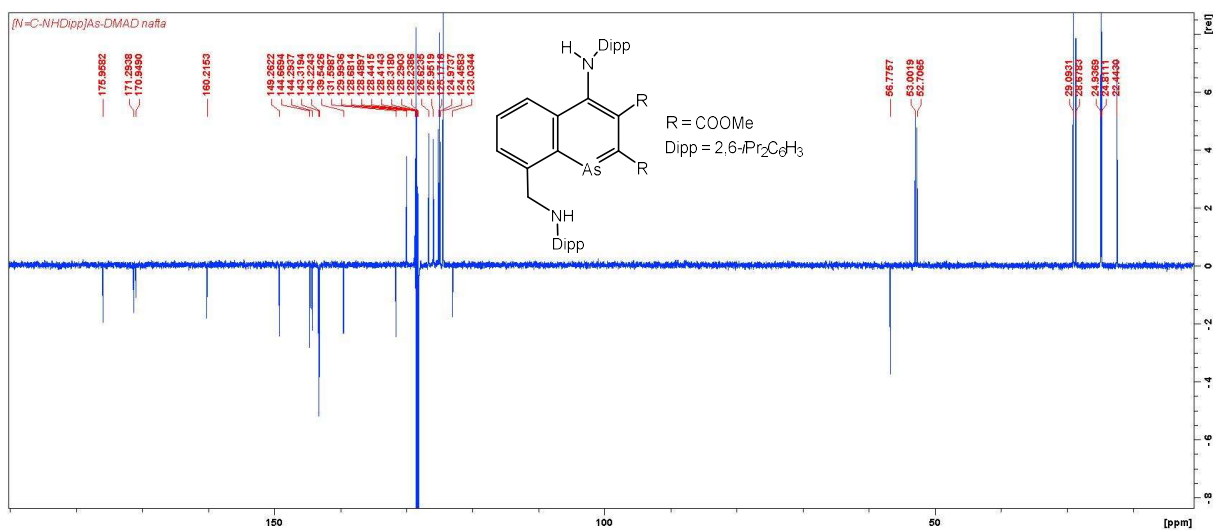

Figure S20:  $^{13}\text{C}\{^1\text{H}\}$  NMR spectrum of **8-As** in  $\text{C}_6\text{D}_6$  (125.6 MHz).



[6H, d,  $^3J_{H,H} = 6.8$  Hz, *iPr-CH<sub>3</sub>*]; 1.17 [6H, d,  $^3J_{H,H} = 6.8$  Hz, *iPr-CH<sub>3</sub>*]; 1.30 [3H, m, *iPr-CH<sub>3</sub>*]; 1.43 [3H, d(br), *iPr-CH<sub>3</sub>*]; 2.87 [1H, m(br), *iPr-CH*]; 2.95 [2H, h,  $^3J_{H,H} = 6.8$  Hz, *iPr-CH*]; 3.29 [3H, s, OCH<sub>3</sub>]; 3.51 [3H, s, OCH<sub>3</sub>]; 3.75 [1H, m(br), *iPr-CH*]; 6.86 [1H, d,  $^3J_{H,H} = 7.3$  Hz, Ar-H]; 6.97 [1H, t,  $^3J_{H,H} = 7.3$  Hz, Ar-H]; 7.12 [1H, m(br), Ar-H]; 7.16 [5H, m, Ar-H]; 8.05 [1H, s, CH=N]; 8.10 [1H, d,  $^3J_{H,H} = 7.3$  Hz, Ar-H]; 9.35 [1H, s, CH].  $^{13}\text{C}\{^1\text{H}\}$  NMR (125.76 MHz, C<sub>6</sub>D<sub>6</sub>):  $\delta$  24.0 [*iPr-CH<sub>3</sub>*]; 24.1 [*iPr-CH<sub>3</sub>*]; 25.0 [*iPr-CH<sub>3</sub>*]; 25.1 [*iPr-CH<sub>3</sub>*]; 29.0 [*iPr-CH*]; 29.8 [*iPr-CH*]; 51.9 [OCH<sub>3</sub>]; 52.2 [OCH<sub>3</sub>]; 105.8 [CH]; 123.8 [Ar-C]; 125.5 [Ar-C]; 125.6 [Ar-C]; 128.2 [Ar-C]; 128.9 [Ar-C]; 129.0 [Ar-C]; 138.4 [Ar-C]; 141.1 [Ar-C]; 149.1 [Ar-C]; 151.0 [Ar-C]; 155.1 [C=C]; 157.7 [Ar-C]; 165.2 [CH=N]; 167.1 [C=O]; 173.6 [C=O]; 189.4 [Ar-C]; 191.2 [C=C] ppm.

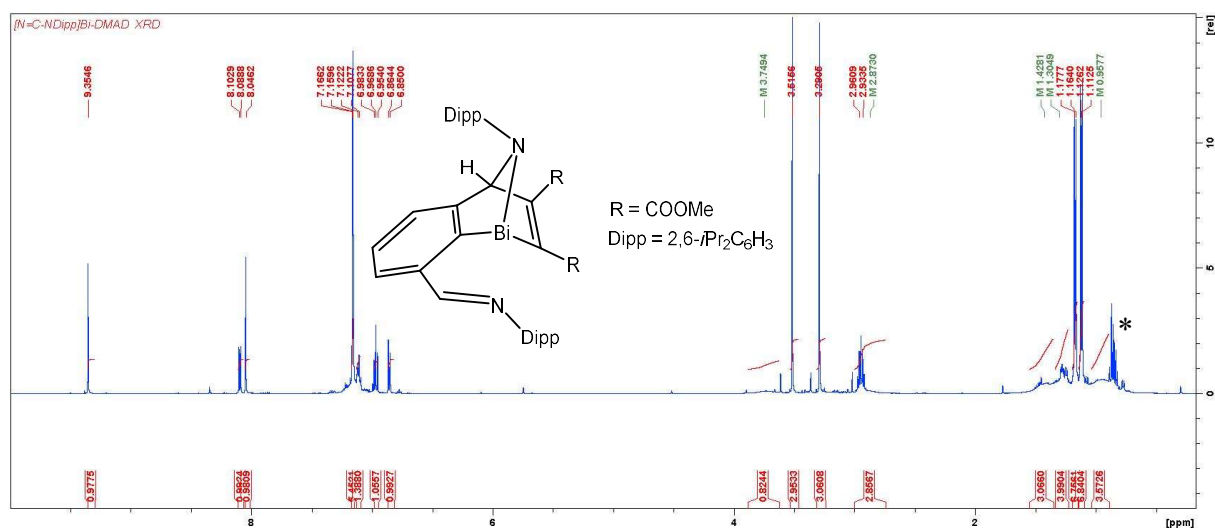

**Figure S23:**  $^1\text{H}$  NMR spectrum of **2-Bi** in  $\text{C}_6\text{D}_6$  (500 MHz). \*denotes traces of hexane solvent.

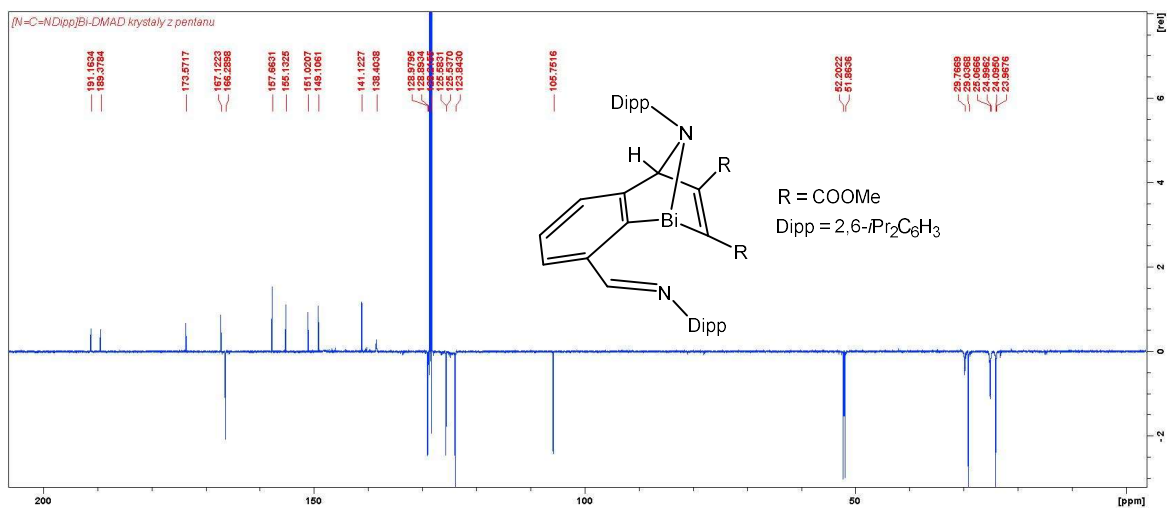

Figure S24:  $^{13}\text{C}\{^1\text{H}\}$  NMR spectrum of **2-Bi** in  $\text{C}_6\text{D}_6$  (125.6 MHz).

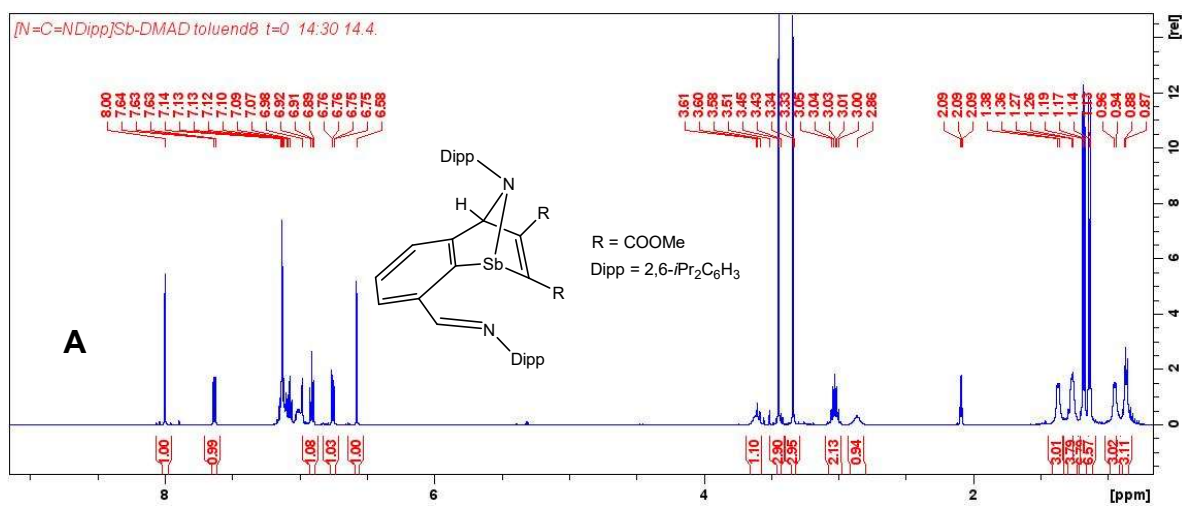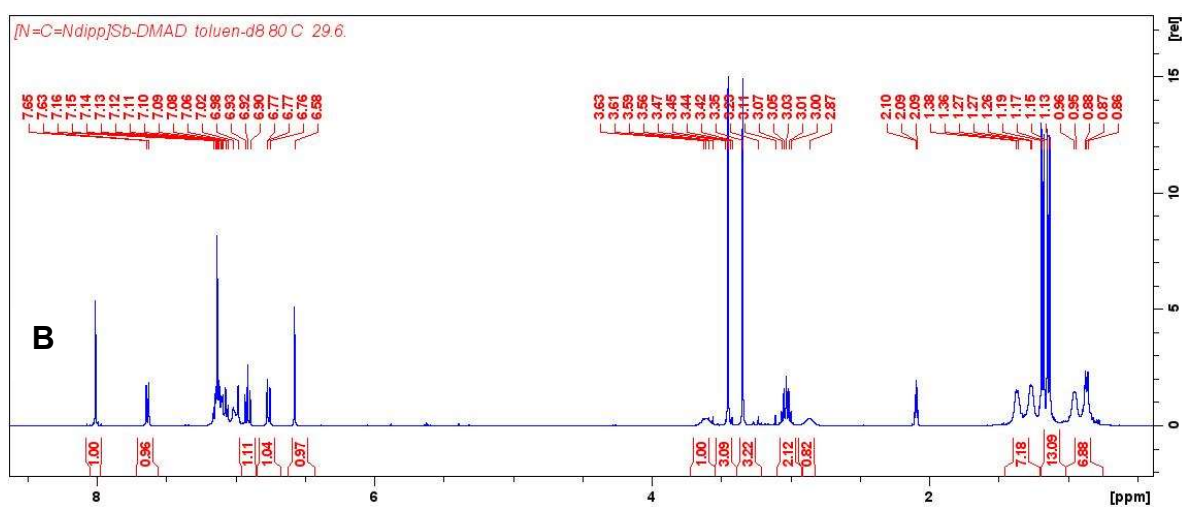

Figure S25:  $^1\text{H}$  NMR spectra showing heating of **2-Sb** in  $\text{C}_6\text{D}_6$  to  $80^\circ\text{C}$  in a sealed NMR tube at the start (**A**, 500 MHz) and after more than 2 months (**B**, 400 MHz).

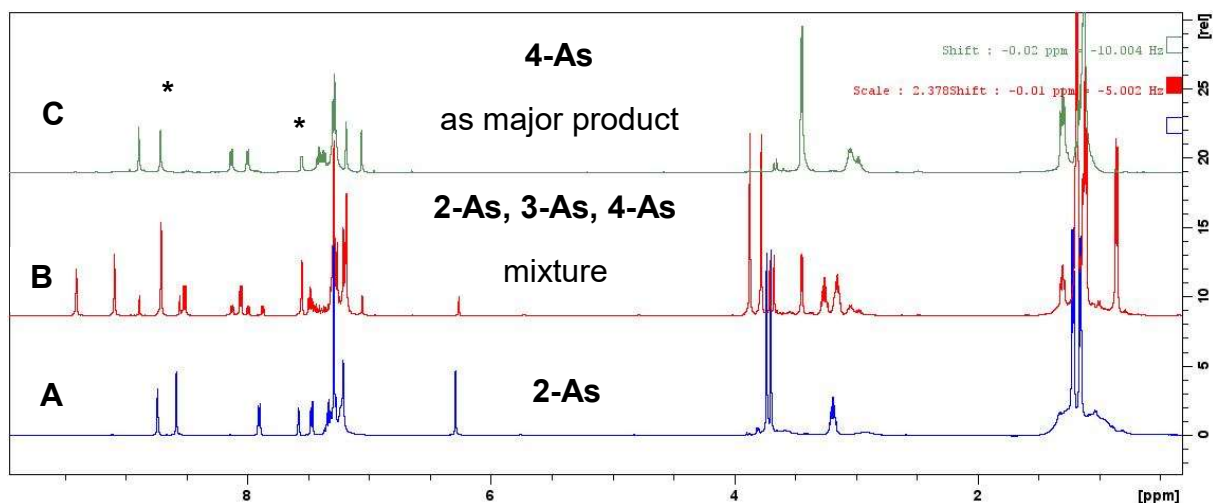

**Figure S26:**  $^1\text{H}$  NMR spectra showing heating of **2-As** in pyridine- $\text{d}_5$  to  $65\text{ }^\circ\text{C}$  in a sealed NMR tube (500 MHz), **A**  $t=0$ , **B**  $t=3\text{h}$ , **C**  $t=24\text{h}$ . \*denotes residual signals of pyridine- $\text{d}_5$ .

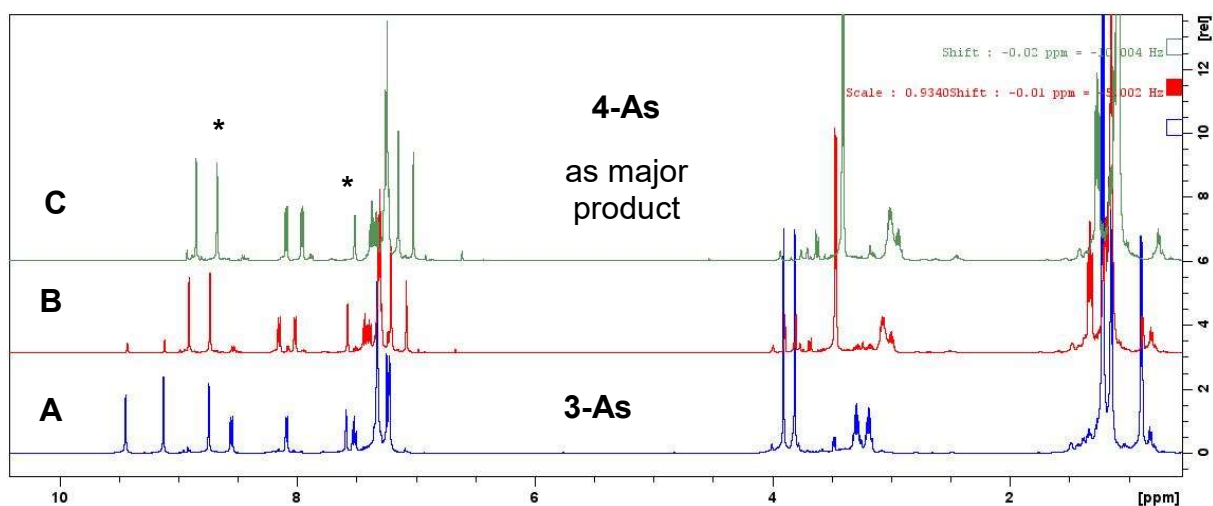

**Figure S27:**  $^1\text{H}$  NMR spectra showing heating of **3-As** in pyridine- $\text{d}_5$  to  $65\text{ }^\circ\text{C}$  in a sealed NMR tube (500 MHz), **A**  $t=0$ , **B**  $t=3\text{h}$ , **C**  $t=24\text{h}$ . \*denotes residual signals of pyridine- $\text{d}_5$ .

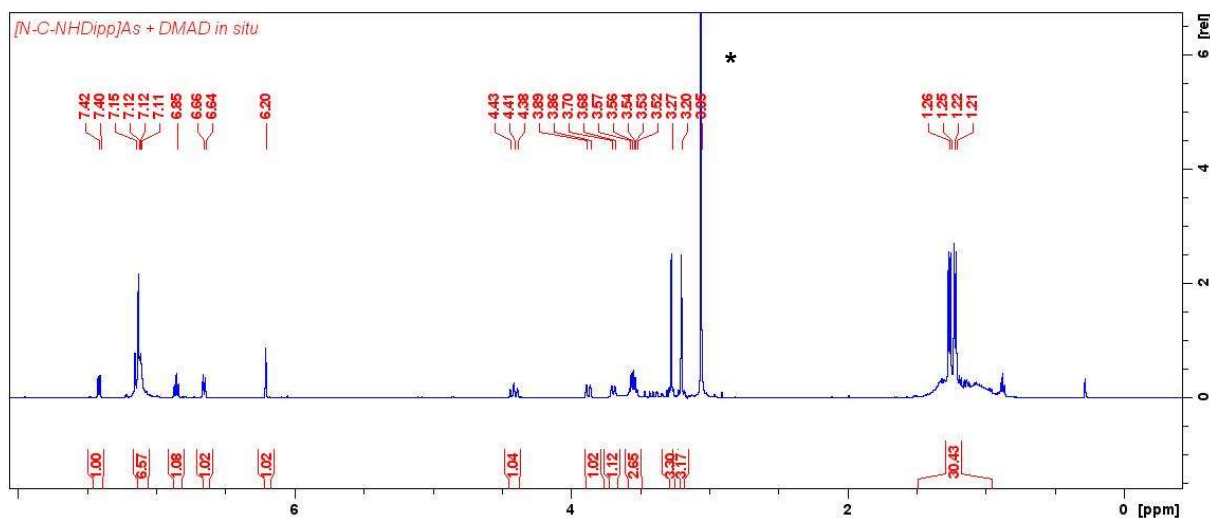

**Figure S28:**  $^1\text{H}$  NMR spectrum showing the reaction mixture after addition of an excess of DMAD (\*) toward **6-As** in  $\text{C}_6\text{D}_6$  in an NMR tube (500 MHz) showing almost clean formation of **7-As** as the product.

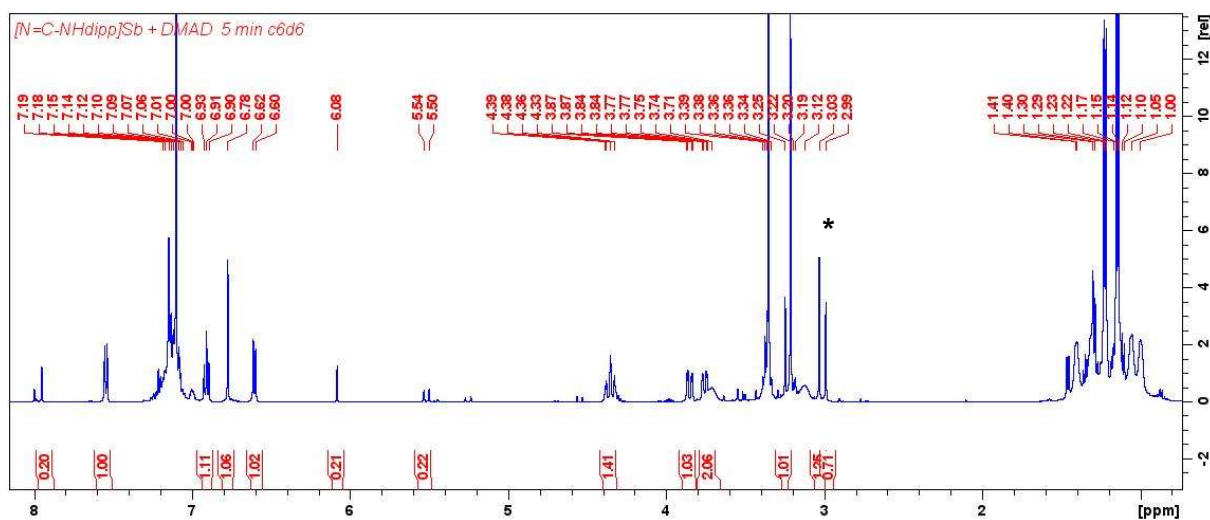

**Figure S29:**  $^1\text{H}$  NMR spectrum showing the reaction mixture after addition of an excess of DMAD (\*) toward **6-Sb** in  $\text{C}_6\text{D}_6$  in an NMR tube (500 MHz) showing mixture of products **7-Sb** being the main component.



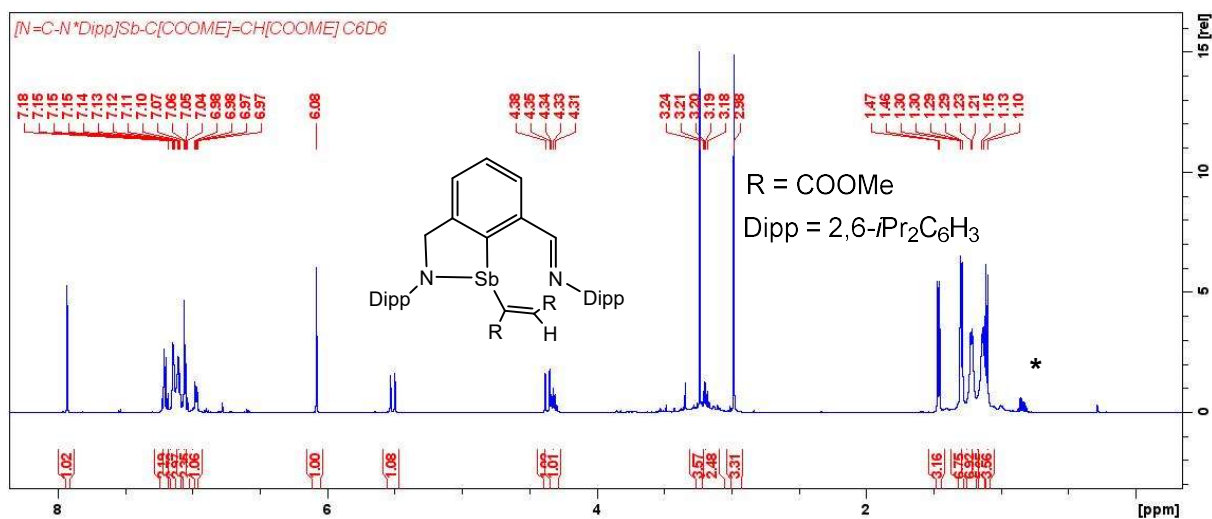

**Figure S30:** <sup>1</sup>H NMR spectrum of **10-Sb** in C<sub>6</sub>D<sub>6</sub> (500 MHz). \*denotes traces of hexane solvent.

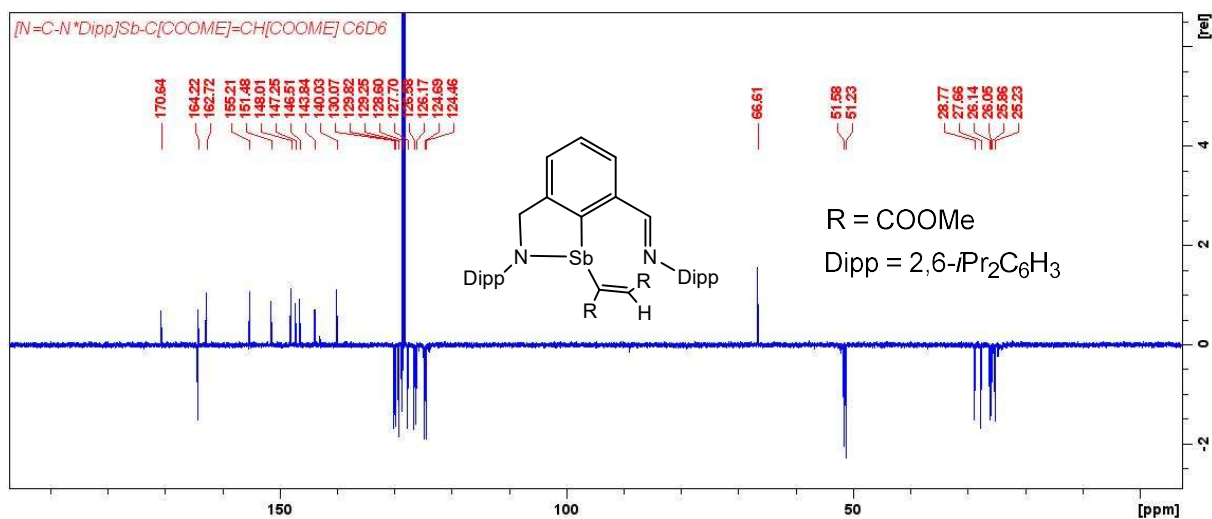

**Figure S31:** <sup>13</sup>C{<sup>1</sup>H} NMR spectrum of **10-Sb** in C<sub>6</sub>D<sub>6</sub> (125.6 MHz).

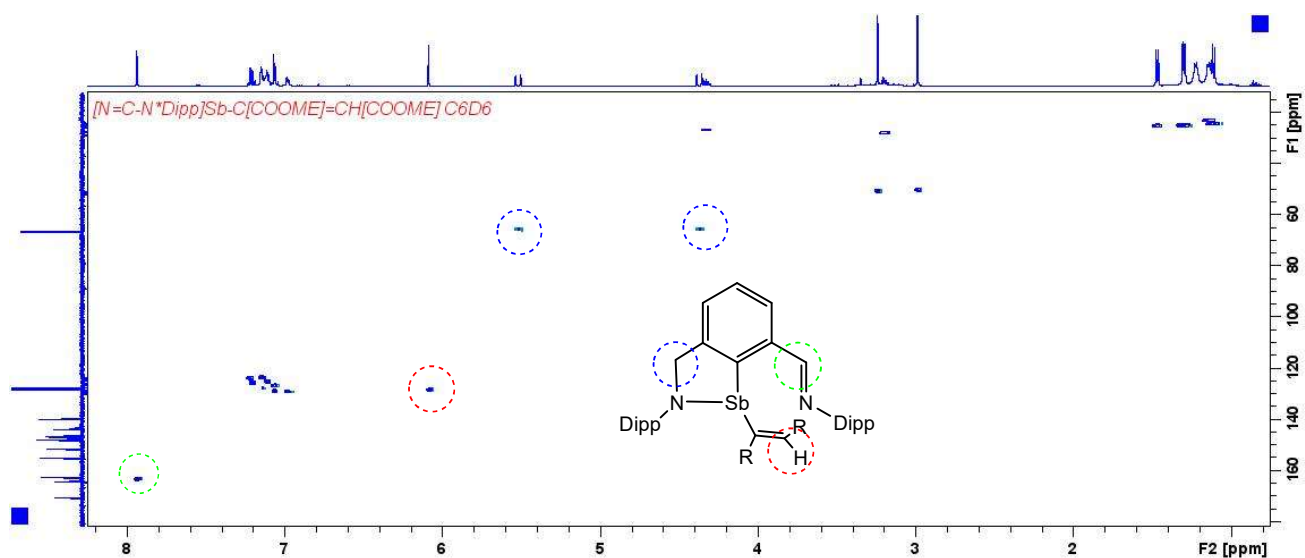

Figure S32: HSQC NMR spectrum of **10-Sb** in  $C_6D_6$

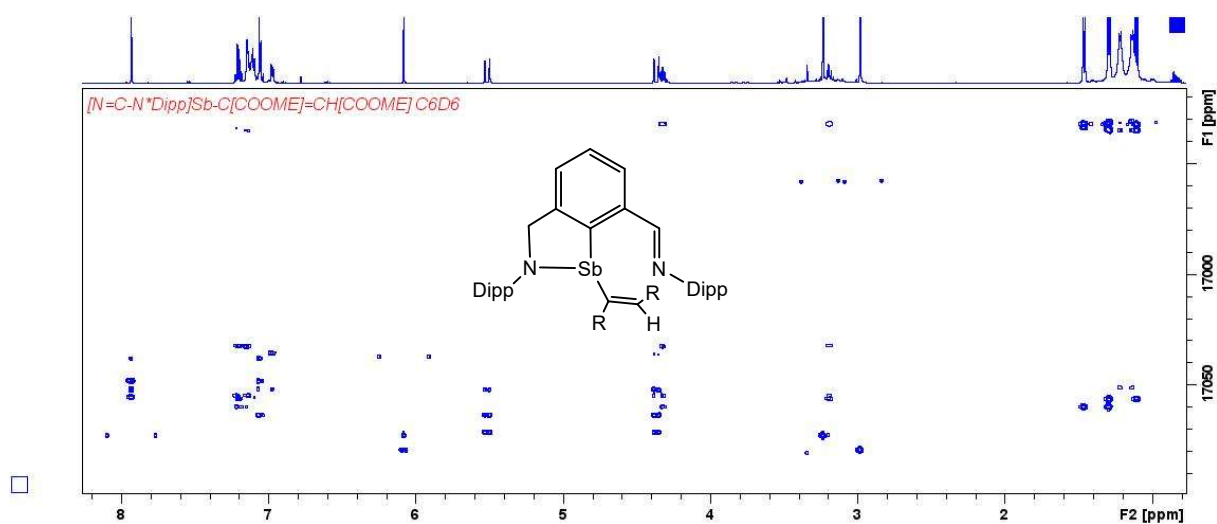

Figure S33: HMBC NMR spectrum of **10-Sb** in  $C_6D_6$ .

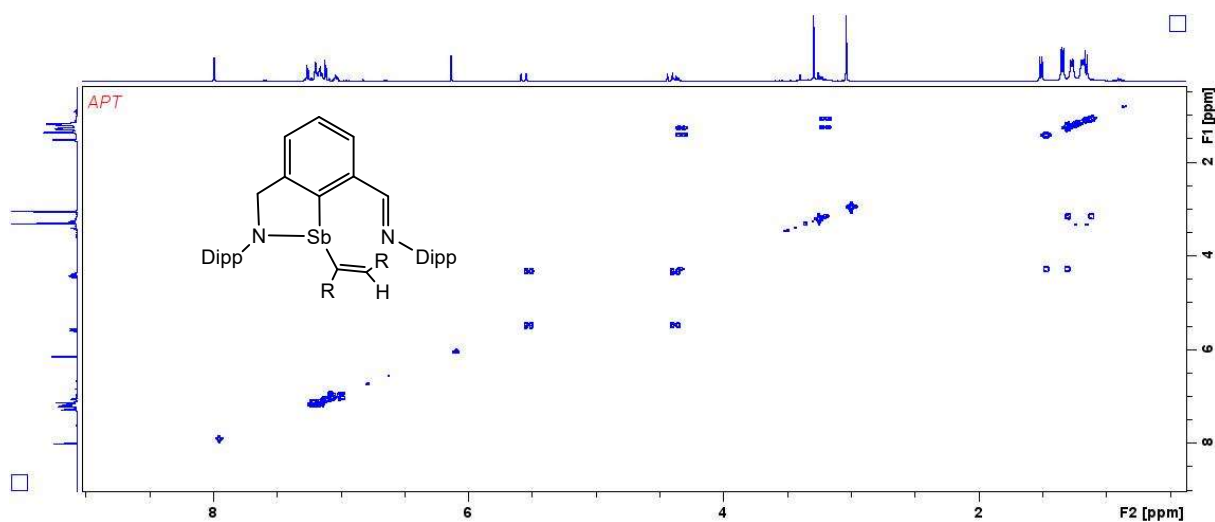

**Figure S34:** H,H COSY NMR spectrum of **10-Sb** in  $C_6D_6$  (400 MHz).

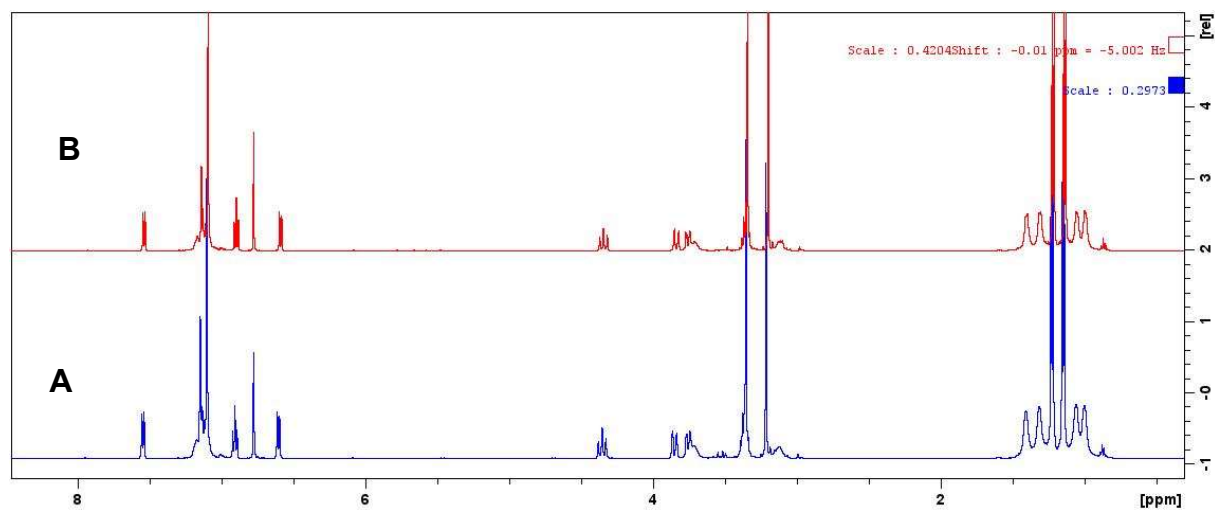

**Figure S35:**  $^1H$  NMR spectra demonstrating the stability of **7-Sb** in  $C_6D_6$  at ambient temperature (500 MHz), **A**  $t=0$ , **B**  $t=14$  days.

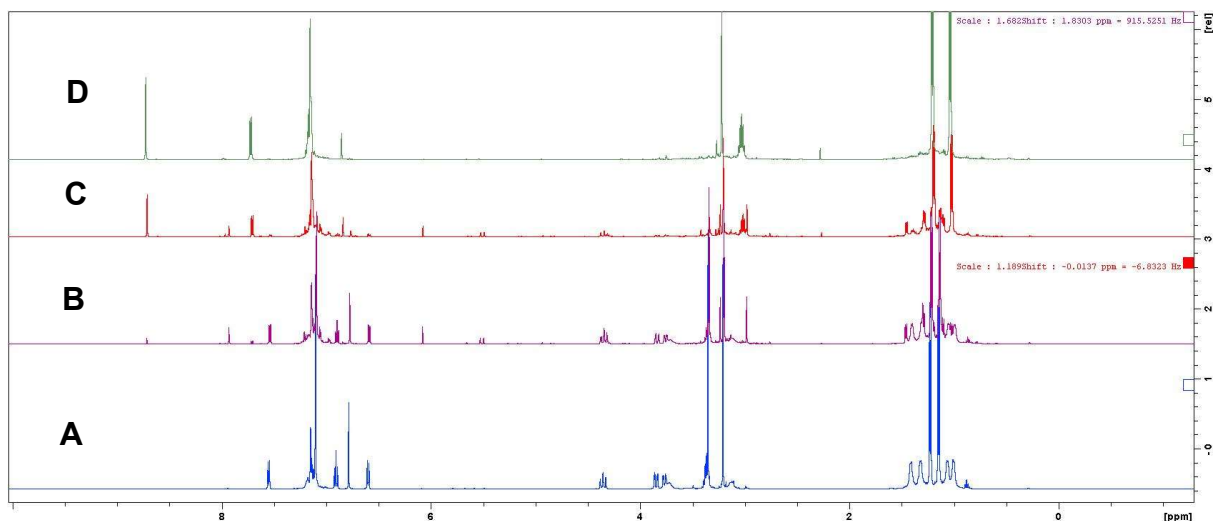

**Figure S36:**  $^1\text{H}$  NMR spectra demonstrating heating of 7-Sb sealed in  $\text{C}_6\text{D}_6$  to  $80^\circ\text{C}$  (500 MHz).

**A**  $t=0$ , **B**  $t=1$  month, **C**  $t=2$  months, **D**  $t=3$  months.

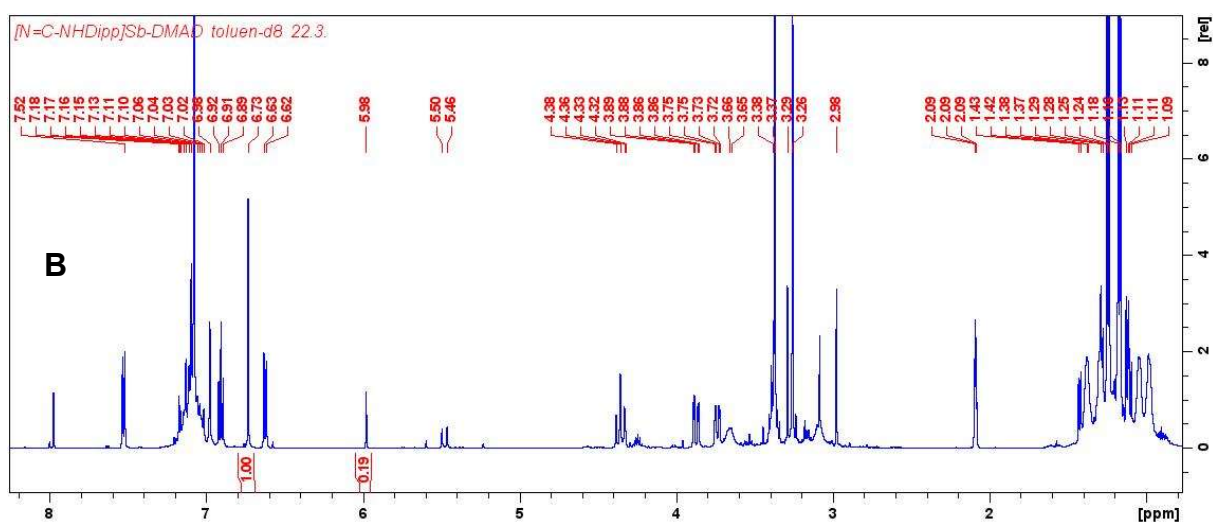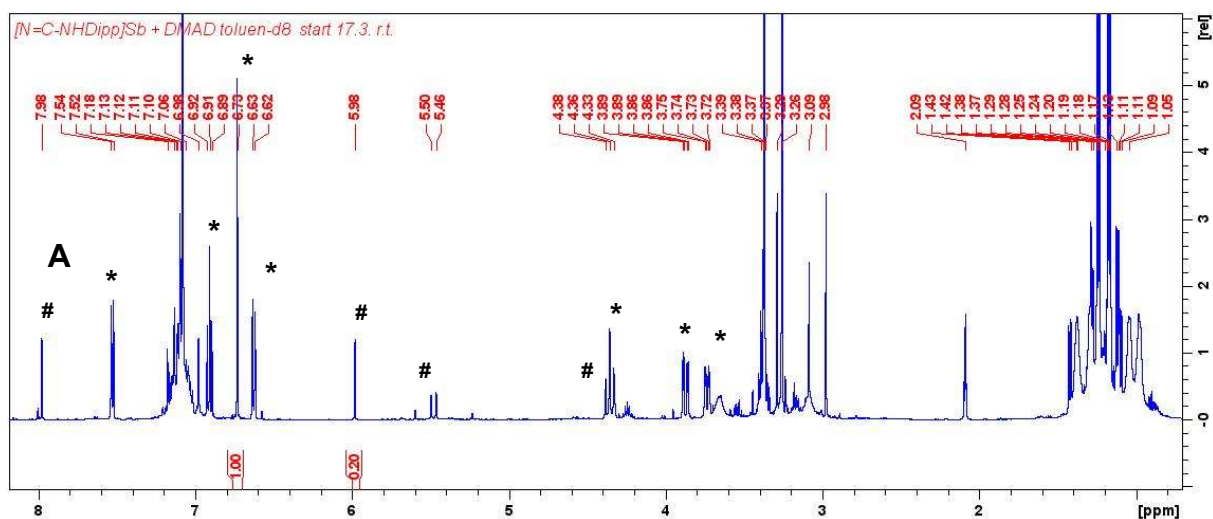

**Figure S37:**  $^1\text{H}$  NMR spectra of crude reaction mixture of **6-Sb** and DMAD in toluene- $d_8$  (500 MHz) containing products **7-Sb** (\*) and **10-Sb** (#), **A**  $t=5$  min, **B**  $t = 5$  days.

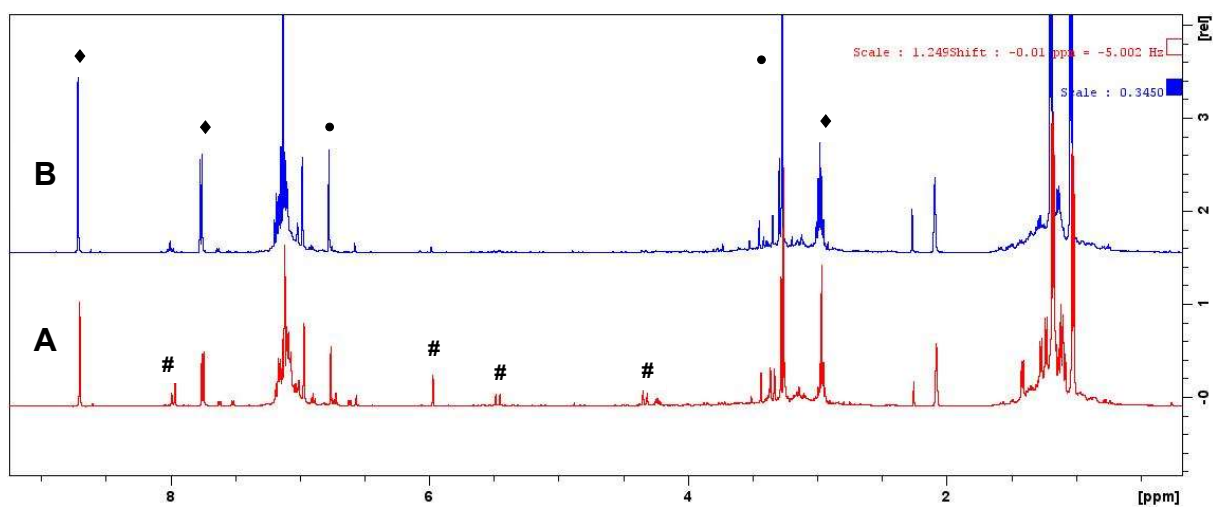

**Figure S38:**  $^1\text{H}$  NMR spectra of mixture of **6-Sb** and DMAD in toluene- $d_8$  (500 MHz) containing **10-Sb** (#) heated to 100 °C producing **1-Sb** (♦) along with dimethylfumarate (•). **A**  $t=24$  hod, **B**  $t = 5$  days.

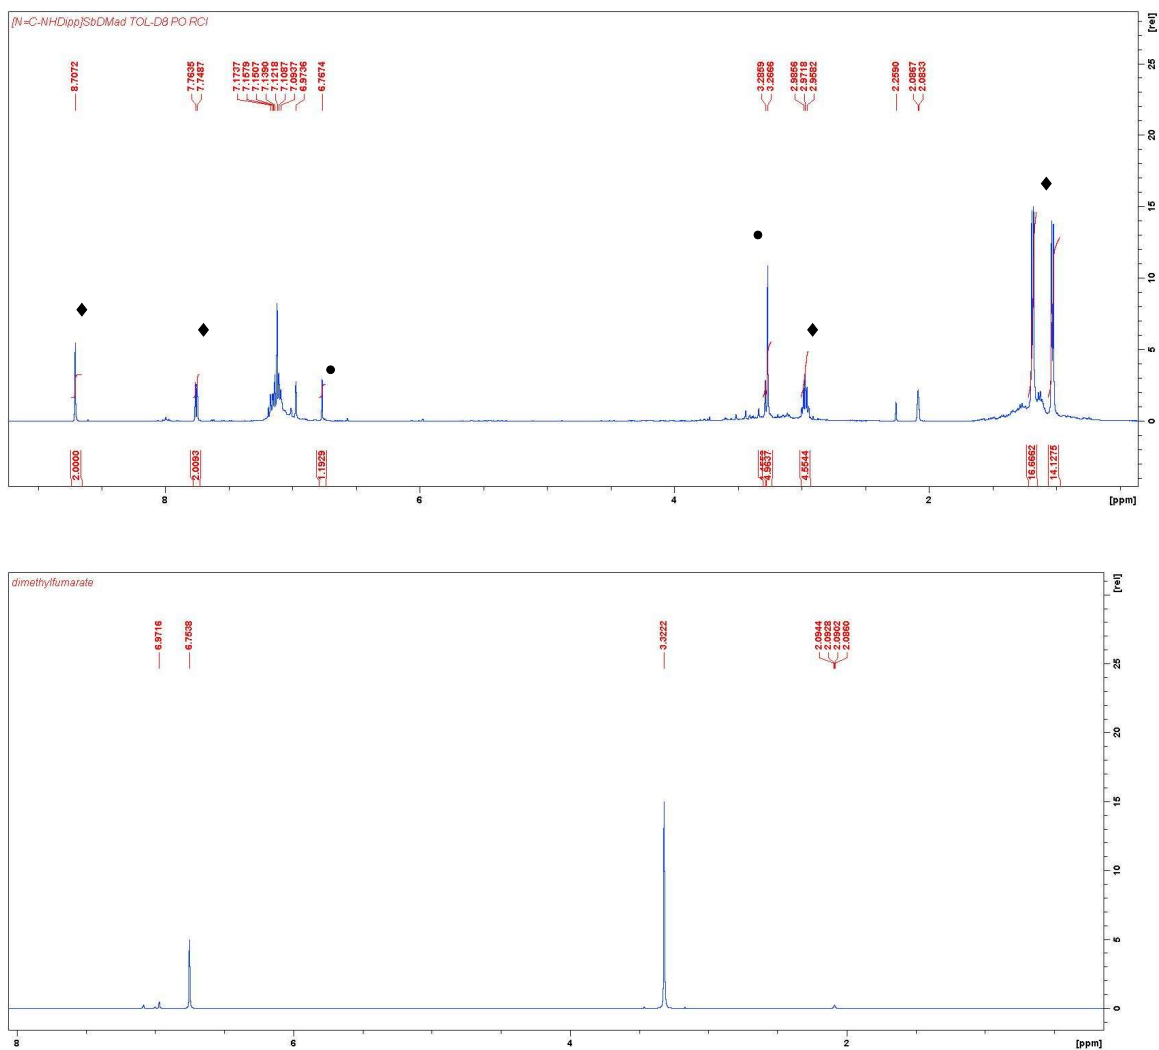

**Figure S39:** Comparison of  $^1\text{H}$  NMR spectra of mixture of **1-Sb** (♦) along with dimethylfumarate (●) vs. pure dimethylfumarate (lower spectrum) obtained after reaction with pure alkenes toluene- $d_8$  (500 MHz).

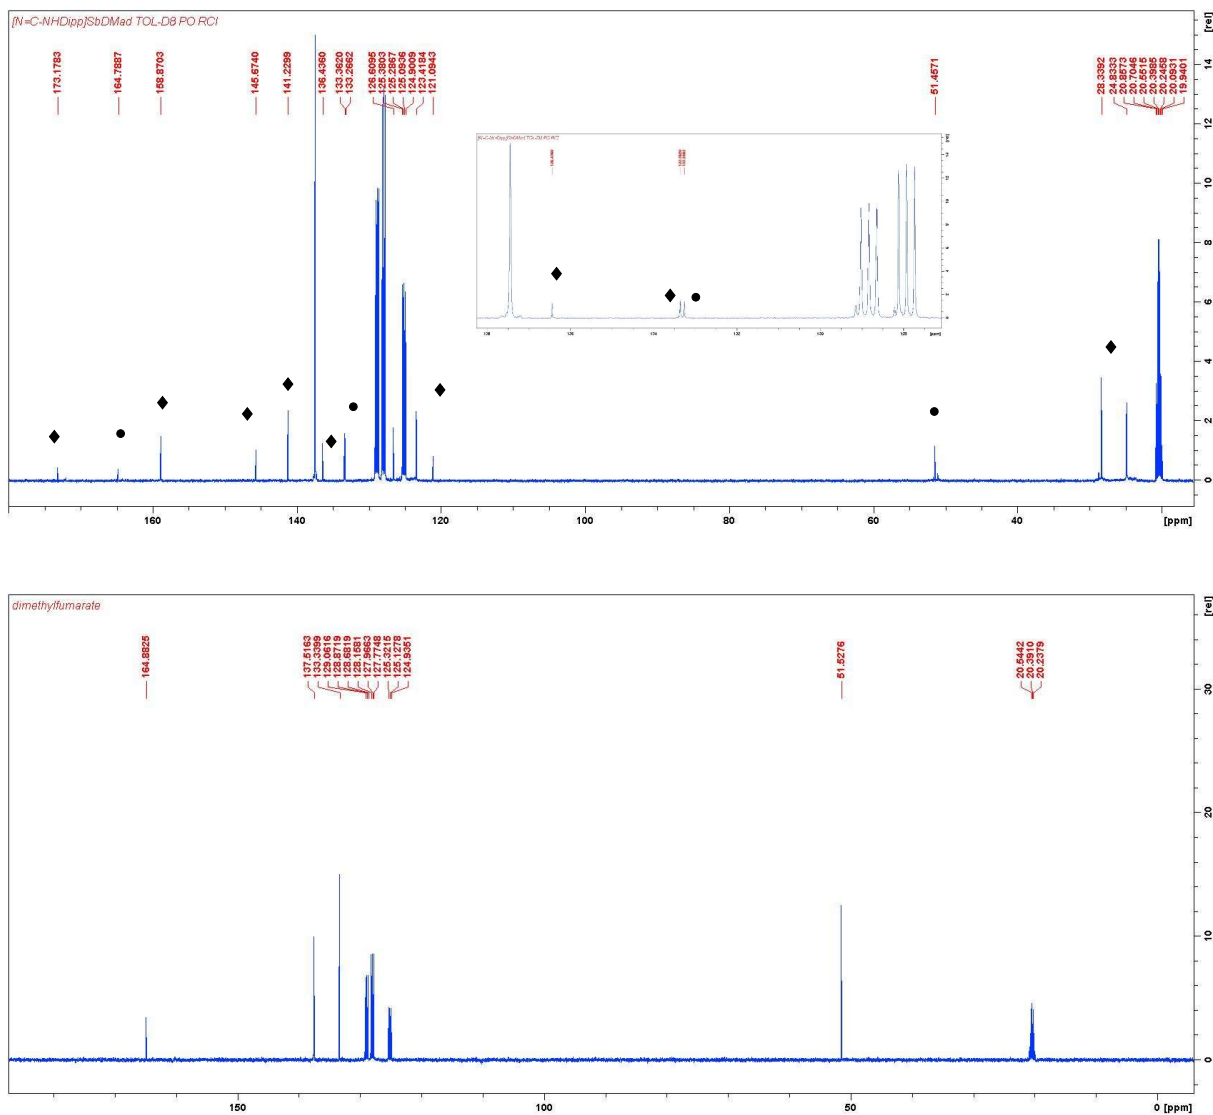

**Figure S40:** Comparison of  $^{13}\text{C}$  NMR spectra of mixture of 1-Sb (♦) along with dimethylfumarate (●) vs. pure dimethylfumarate (lower spectrum) obtained after reaction with pure alkenes toluene- $d_8$  (125.6 MHz).

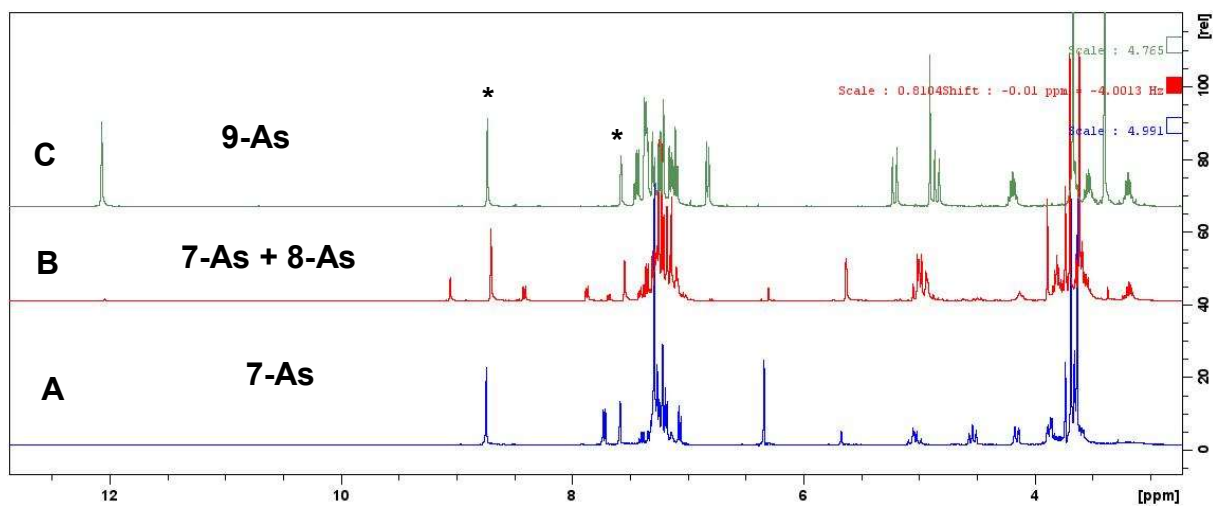

**Figure S41:**  $^1\text{H}$  NMR spectra showing heating of **7-As** in pyridine- $\text{d}_5$  to  $65\text{ }^\circ\text{C}$  in a sealed NMR tube (400 MHz), **A**  $t=0$ , **B**  $t=1\text{ h}$ , **C**  $t=12\text{ h}$ . \*denotes residual signals of pyridine- $\text{d}_5$ .

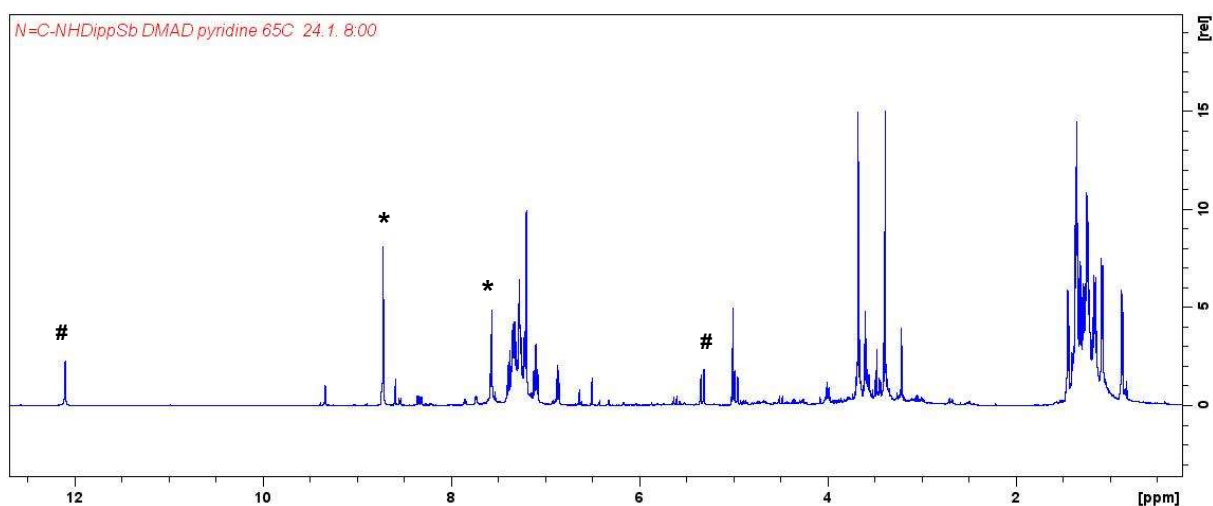

**Figure S42:**  $^1\text{H}$  NMR spectra of mixture obtained after heating of **7-Sb** in pyridine- $\text{d}_5$  to  $65\text{ }^\circ\text{C}$  for 5 days suggesting the presence of the intended product **9-Sb** (#) (500 MHz). \*denotes residual signals of pyridine- $\text{d}_5$ .



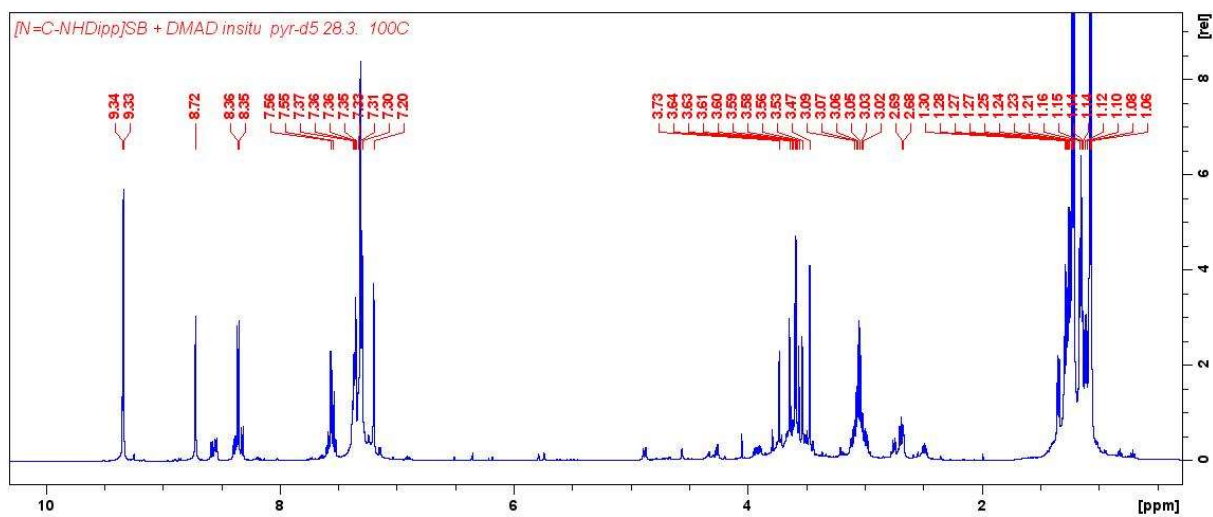

**Figure S43:**  $^1\text{H}$  NMR spectra of mixture of **6-Sb** and DMAD in pyridine- $d_5$  (500 MHz) heated to 80 °C for 5 days.

## 2. Crystallographic data.

**Table S1.** Crystal data and structure refinement of studied compounds.

|                                                                                     | <b>2-As</b>                                                     | <b>2-Sb</b>                                                      | <b>2-Bi</b>                                                     |
|-------------------------------------------------------------------------------------|-----------------------------------------------------------------|------------------------------------------------------------------|-----------------------------------------------------------------|
| Formula                                                                             | C <sub>38</sub> H <sub>45</sub> AsN <sub>2</sub> O <sub>4</sub> | C <sub>38</sub> H <sub>45</sub> N <sub>2</sub> O <sub>4</sub> Sb | C <sub>38</sub> H <sub>45</sub> BiN <sub>2</sub> O <sub>4</sub> |
| Formula weight, g mol <sup>-1</sup>                                                 | 668.68                                                          | 715.51                                                           | 802.74                                                          |
| Crystal system                                                                      | Triclinic                                                       | Triclinic                                                        | Orthorhombic                                                    |
| Crystal size, mm                                                                    | 0.52 × 0.32 × 0.23                                              | 0.59 × 0.35 × 0.10                                               | 0.36 × 0.11 × 0.07                                              |
| Space group                                                                         | P-1                                                             | P-1                                                              | Pna2 <sub>1</sub>                                               |
| <i>a</i> , Å                                                                        | 10.2024(7)                                                      | 10.0390(4)                                                       | 22.8568(7)                                                      |
| <i>b</i> , Å                                                                        | 11.4261(7)                                                      | 11.2202(4)                                                       | 10.9255(4)                                                      |
| <i>c</i> , Å                                                                        | 16.6186(10)                                                     | 17.4320(6)                                                       | 28.4085(8)                                                      |
| $\alpha$ , °                                                                        | 102.369(3)                                                      | 102.590(2)                                                       | 90                                                              |
| $\beta$ , °                                                                         | 99.956(3)                                                       | 97.846(2)                                                        | 90                                                              |
| $\gamma$ , °                                                                        | 107.749(3)                                                      | 107.829(2)                                                       | 90                                                              |
| <i>V</i> , Å <sup>3</sup>                                                           | 1742.2(2)                                                       | 1780.10(12)                                                      | 7094.2(4)                                                       |
| <i>Z</i>                                                                            | 2                                                               | 2                                                                | 8                                                               |
| $\rho_{\text{calcd}}$ , Mg m <sup>-3</sup>                                          | 1.275                                                           | 1.335                                                            | 1.503                                                           |
| $\mu$ (Mo <i>K</i> $\alpha$ ), mm <sup>-1</sup>                                     | 1.016                                                           | 0.815                                                            | 5.011                                                           |
| <i>F</i> (000)                                                                      | 704                                                             | 740                                                              | 3216                                                            |
| $\theta$ range, deg                                                                 | 1 to 27.5                                                       | 1 to 27.5                                                        | 1 to 27.5                                                       |
| No. of reflns collected                                                             | 51025                                                           | 57227                                                            | 65003                                                           |
| No. indep. Reflns                                                                   | 8056                                                            | 8216                                                             | 16139                                                           |
| No. obsd reflns with ( <i>I</i> > 2 $\sigma$ ( <i>I</i> )), <i>R</i> <sub>int</sub> | 6873, 0.044                                                     | 6656, 0.057                                                      | 10821, 0.15                                                     |
| No. refined params                                                                  | 422                                                             | 419                                                              | 827                                                             |
| GooF ( <i>F</i> <sup>2</sup> )                                                      | 1.057                                                           | 1.078                                                            | 1.005                                                           |
| <i>R</i> <sub>1</sub> ( <i>F</i> ) ( <i>I</i> > 2 $\sigma$ ( <i>I</i> ))            | 0.063                                                           | 0.044                                                            | 0.063                                                           |
| <i>wR</i> <sub>2</sub> ( <i>F</i> <sup>2</sup> ) (all data)                         | 0.113                                                           | 0.076                                                            | 0.081                                                           |
| Largest diff peak/hole, e Å <sup>-3</sup>                                           | 1.107 / -0.808                                                  | 0.554 / -0.868                                                   | 1.646 / -1.857                                                  |
| CCDC                                                                                | 2192914                                                         | 2192911                                                          | 2192912                                                         |

$$R_{\text{int}} = \frac{\sum |F_o^2 - F_{o,\text{mean}}^2|}{\sum F_o^2}, S = \left[ \frac{\sum (w(F_o^2 - F_c^2)^2)}{(N_{\text{diffrs}} - N_{\text{params}})} \right]^{1/2} \text{ for all data, } R(F) = \frac{\sum ||F_o| - |F_c||}{\sum |F_o|} \text{ for observed data, } wR(F^2) = \left[ \frac{\sum (w(F_o^2 - F_c^2)^2)}{(\sum w(F_o^2)^2)} \right]^{1/2} \text{ for all data.}$$

**Table S1 (continuation).** Crystal data and structure refinement of studied compounds.

|                                                                                     | <b>4-Sb</b>                                                                                       | <b>5-As</b>                                                     | <b>5-Sb</b>                                                      |
|-------------------------------------------------------------------------------------|---------------------------------------------------------------------------------------------------|-----------------------------------------------------------------|------------------------------------------------------------------|
| Formula                                                                             | C <sub>38</sub> H <sub>45</sub> N <sub>2</sub> O <sub>4</sub> Sb.(C <sub>6</sub> H <sub>6</sub> ) | C <sub>44</sub> H <sub>51</sub> AsN <sub>2</sub> O <sub>8</sub> | C <sub>44</sub> H <sub>51</sub> N <sub>2</sub> O <sub>8</sub> Sb |
| Formula weight, g mol <sup>-1</sup>                                                 | 793.61                                                                                            | 810.78                                                          | 857.61                                                           |
| Crystal system                                                                      | Triclinic                                                                                         | Triclinic                                                       | Triclinic                                                        |
| Crystal size, mm                                                                    | 0.59 × 0.26 × 0.07                                                                                | 0.59 × 0.26 × 0.06                                              | 0.59 × 0.46 × 0.30                                               |
| Space group                                                                         | P-1                                                                                               | P-1                                                             | P-1                                                              |
| <i>a</i> , Å                                                                        | 8.7928(3)                                                                                         | 11.405(2)                                                       | 11.361(3)                                                        |
| <i>b</i> , Å                                                                        | 11.5342(4)                                                                                        | 14.254(3)                                                       | 14.190(3)                                                        |
| <i>c</i> , Å                                                                        | 20.5702(7)                                                                                        | 14.960(3)                                                       | 15.078(3)                                                        |
| $\alpha$ , °                                                                        | 76.875(2)                                                                                         | 72.640(8)                                                       | 89.581(8)                                                        |
| $\beta$ , °                                                                         | 87.983(3)                                                                                         | 70.438(9)                                                       | 71.665(9)                                                        |
| $\gamma$ , °                                                                        | 77.437(2)                                                                                         | 68.085(9)                                                       | 66.480(9)                                                        |
| <i>V</i> , Å <sup>3</sup>                                                           | 1982.82(12)                                                                                       | 2083.3(7)                                                       | 2096.1(8)                                                        |
| <i>Z</i>                                                                            | 2                                                                                                 | 2                                                               | 2                                                                |
| $\rho_{\text{calcd}}$ , Mg m <sup>-3</sup>                                          | 1.329                                                                                             | 1.292                                                           | 1.359                                                            |
| $\mu$ (Mo <i>K</i> $\alpha$ ), mm <sup>-1</sup>                                     | 0.739                                                                                             | 0.869                                                           | 0.712                                                            |
| <i>F</i> (000)                                                                      | 824                                                                                               | 852                                                             | 888                                                              |
| $\theta$ range, deg                                                                 | 1 to 27.5                                                                                         | 1 to 27.5                                                       | 1 to 27.5                                                        |
| No. of reflns collected                                                             | 69042                                                                                             | 31555                                                           | 41762                                                            |
| No. indep. Reflns                                                                   | 9170                                                                                              | 7492                                                            | 10322                                                            |
| No. obsd reflns with ( <i>I</i> > 2 $\sigma$ ( <i>I</i> )), <i>R</i> <sub>int</sub> | 8107, 0.032                                                                                       | 6079, 0.082                                                     | 9170, 0.036                                                      |
| No. refined params                                                                  | 458                                                                                               | 517                                                             | 508                                                              |
| Goof ( <i>F</i> <sup>2</sup> )                                                      | 1.085                                                                                             | 1.095                                                           | 1.000                                                            |
| <i>R</i> <sub>1</sub> ( <i>F</i> ) ( <i>I</i> > 2 $\sigma$ ( <i>I</i> ))            | 0.032                                                                                             | 0.061                                                           | 0.028                                                            |
| <i>wR</i> <sub>2</sub> ( <i>F</i> <sup>2</sup> ) (all data)                         | 0.067                                                                                             | 0.158                                                           | 0.064                                                            |
| Largest diff peak/hole, e Å <sup>-3</sup>                                           | 0.603 / -0.565                                                                                    | 0.822 / -1.333                                                  | 0.611 / -0.818                                                   |
| CCDC                                                                                | 2192913                                                                                           | 2192918                                                         | 2192916                                                          |

$$R_{\text{int}} = \frac{\sum |F_o^2 - F_{o,\text{mean}}^2|}{\sum F_o^2}, S = \left[ \frac{\sum (w(F_o^2 - F_c^2)^2)}{(N_{\text{diffrs}} - N_{\text{params}})} \right]^{1/2} \text{ for all data, } R(F) = \frac{\sum ||F_o| - |F_c||}{\sum |F_o|} \text{ for observed data, } wR(F^2) = \left[ \frac{\sum (w(F_o^2 - F_c^2)^2)}{(\sum w(F_o^2)^2)} \right]^{1/2} \text{ for all data.}$$

**Table S1 (continuation).** Crystal data and structure refinement of studied compounds.

|                                                                                     | <b>7-Sb</b>                                                      | <b>8-As</b>                                                     | <b>9-As</b>                                                     |
|-------------------------------------------------------------------------------------|------------------------------------------------------------------|-----------------------------------------------------------------|-----------------------------------------------------------------|
| Formula                                                                             | C <sub>38</sub> H <sub>47</sub> N <sub>2</sub> O <sub>4</sub> Sb | C <sub>38</sub> H <sub>47</sub> AsN <sub>2</sub> O <sub>4</sub> | C <sub>38</sub> H <sub>47</sub> AsN <sub>2</sub> O <sub>4</sub> |
| Formula weight, g mol <sup>-1</sup>                                                 | 717.52                                                           | 670.69                                                          | 670.69                                                          |
| Crystal system                                                                      | Triclinic                                                        | Triclinic                                                       | Monoclinic                                                      |
| Crystal size, mm                                                                    | 0.33 × 0.26 × 0.22                                               | 0.43 × 0.30 × 0.16                                              | 0.29 × 0.24 × 0.08                                              |
| Space group                                                                         | P-1                                                              | P-1                                                             | C2/c                                                            |
| <i>a</i> , Å                                                                        | 9.8206(4)                                                        | 11.1958(5)                                                      | 30.1953(13)                                                     |
| <i>b</i> , Å                                                                        | 10.0140(4)                                                       | 12.5602(6)                                                      | 10.8768(5)                                                      |
| <i>c</i> , Å                                                                        | 19.2579(6)                                                       | 12.8491(6)                                                      | 25.0422(16)                                                     |
| $\alpha$ , °                                                                        | 91.373(2)                                                        | 89.006(2)                                                       | 90                                                              |
| $\beta$ , °                                                                         | 103.932(2)                                                       | 80.027(2)                                                       | 123.4430(10)                                                    |
| $\gamma$ , °                                                                        | 104.657(2)                                                       | 80.477(2)                                                       | 90                                                              |
| <i>V</i> , Å <sup>3</sup>                                                           | 1780.27(12)                                                      | 1759.59(14)                                                     | 6862.9(6)                                                       |
| <i>Z</i>                                                                            | 2                                                                | 2                                                               | 8                                                               |
| $\rho_{\text{calcd}}$ , Mg m <sup>-3</sup>                                          | 1.339                                                            | 1.266                                                           | 1.298                                                           |
| $\mu$ (Mo <i>K</i> $\alpha$ ), mm <sup>-1</sup>                                     | 0.815                                                            | 1.007                                                           | 1.032                                                           |
| <i>F</i> (000)                                                                      | 744                                                              | 708                                                             | 2832                                                            |
| $\theta$ range, deg                                                                 | 1 to 27.5                                                        | 1 to 27.5                                                       | 1 to 27.5                                                       |
| No. of reflns collected                                                             | 61486                                                            | 54993                                                           | 89196                                                           |
| No. indep. Reflns                                                                   | 8209                                                             | 8124                                                            | 7910                                                            |
| No. obsd reflns with ( <i>I</i> > 2 $\sigma$ ( <i>I</i> )), <i>R</i> <sub>int</sub> | 7414, 0.033                                                      | 6961, 0.035                                                     | 6206, 0.043                                                     |
| No. refined params                                                                  | 420                                                              | 424                                                             | 420                                                             |
| Goof ( <i>F</i> <sup>2</sup> )                                                      | 1.085                                                            | 1.045                                                           | 1.028                                                           |
| <i>R</i> <sub>1</sub> ( <i>F</i> ) ( <i>I</i> > 2 $\sigma$ ( <i>I</i> ))            | 0.033                                                            | 0.034                                                           | 0.041                                                           |
| <i>wR</i> <sub>2</sub> ( <i>F</i> <sup>2</sup> ) (all data)                         | 0.075                                                            | 0.075                                                           | 0.078                                                           |
| Largest diff peak/hole, e Å <sup>-3</sup>                                           | 1.171 / -0.839                                                   | 0.549 / -0.463                                                  | 0.716 / -0.598                                                  |
| CCDC                                                                                | 2192915                                                          | 2192919                                                         | 2192917                                                         |

$$R_{\text{int}} = \frac{\sum |F_o^2 - F_{o,\text{mean}}^2|}{\sum F_o^2}, S = \left[ \frac{\sum (w(F_o^2 - F_c^2)^2)}{(N_{\text{diffrs}} - N_{\text{params}})} \right]^{1/2} \text{ for all data, } R(F) = \frac{\sum ||F_o| - |F_c||}{\sum |F_o|} \text{ for observed data, } wR(F^2) = \left[ \frac{\sum (w(F_o^2 - F_c^2)^2)}{(\sum w(F_o^2)^2)} \right]^{1/2} \text{ for all data.}$$

### 3. IR and Raman spectra

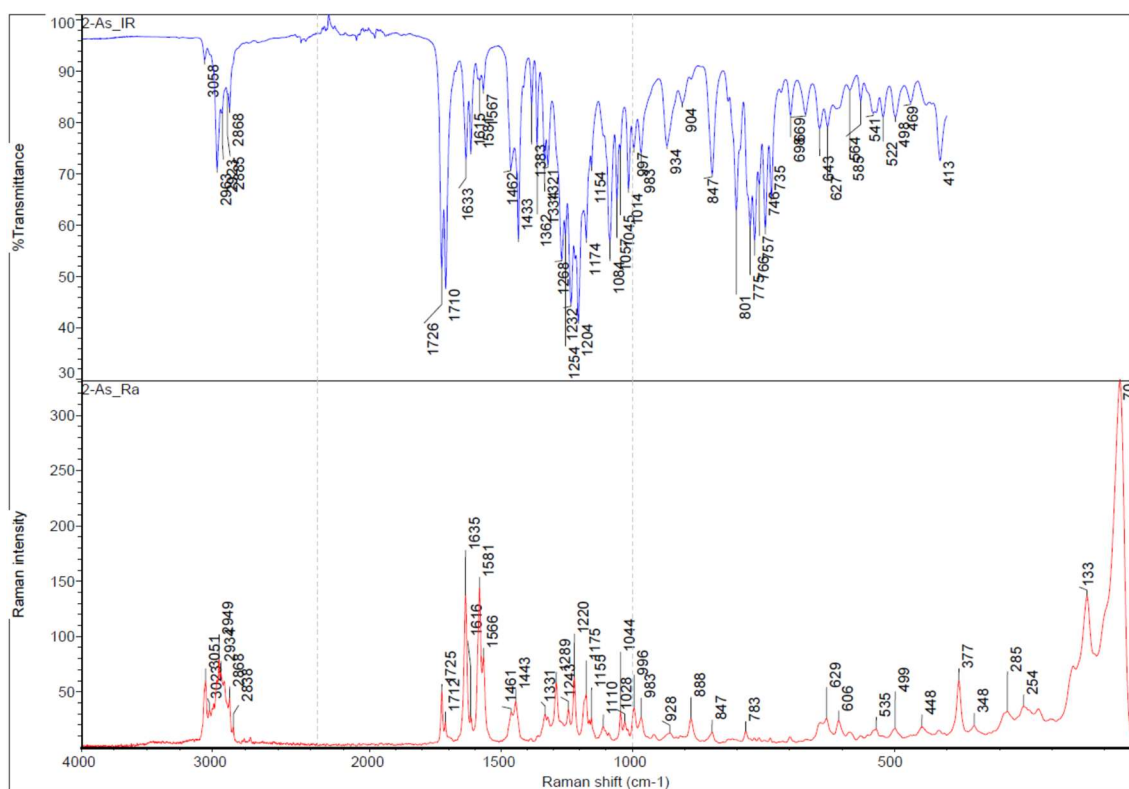

Figure S42: Infrared (top) and Raman (bottom) spectra of 2-As.

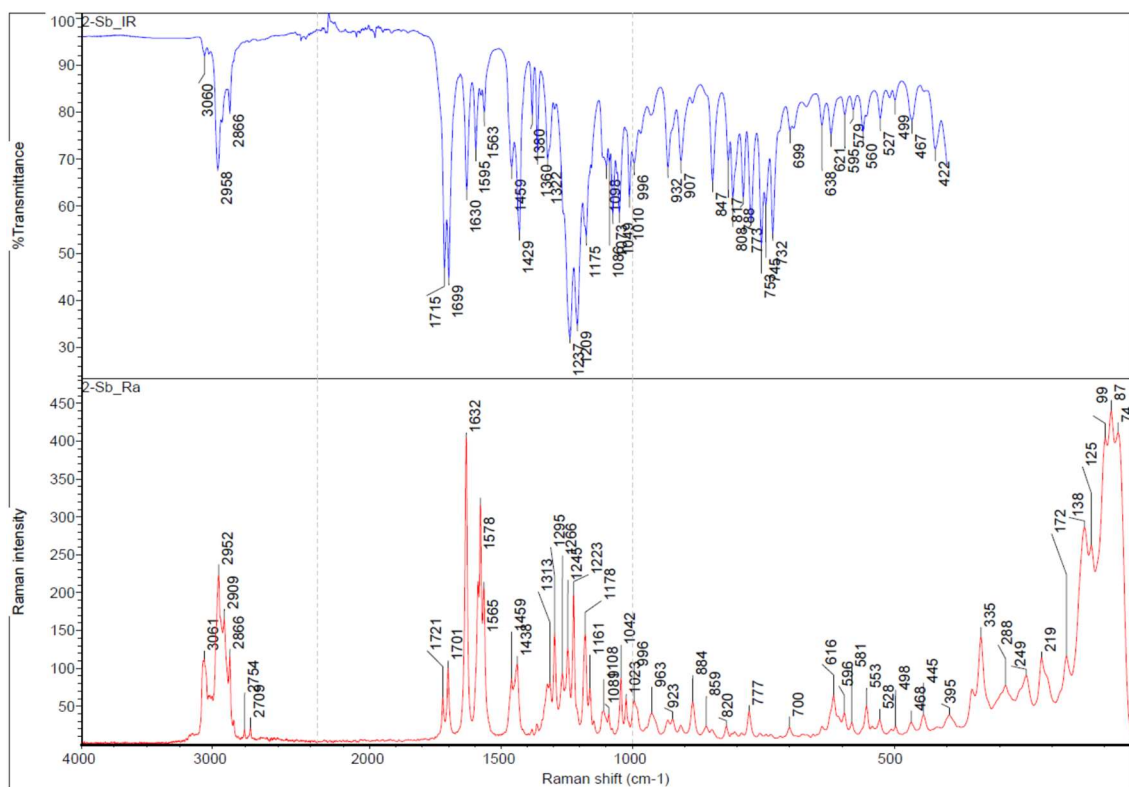

Figure S43: Infrared (top) and Raman (bottom) spectra of 2-Sb.

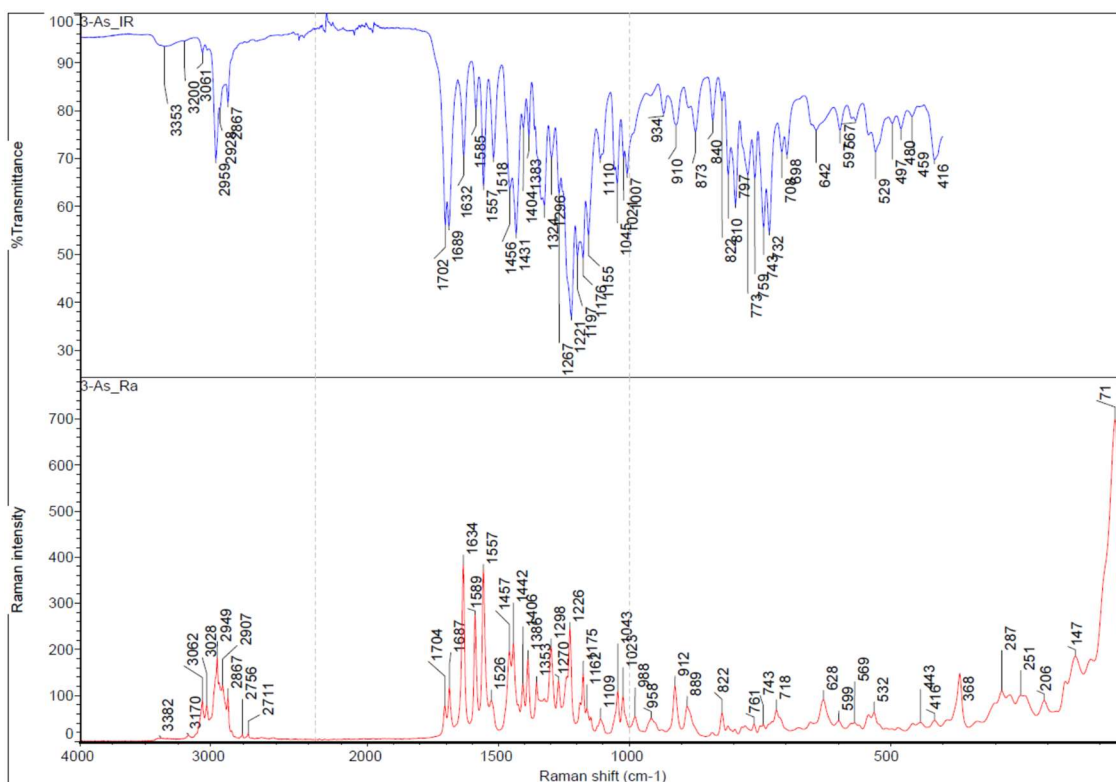

Figure S44: Infrared (top) and Raman (bottom) spectra of 3-As.

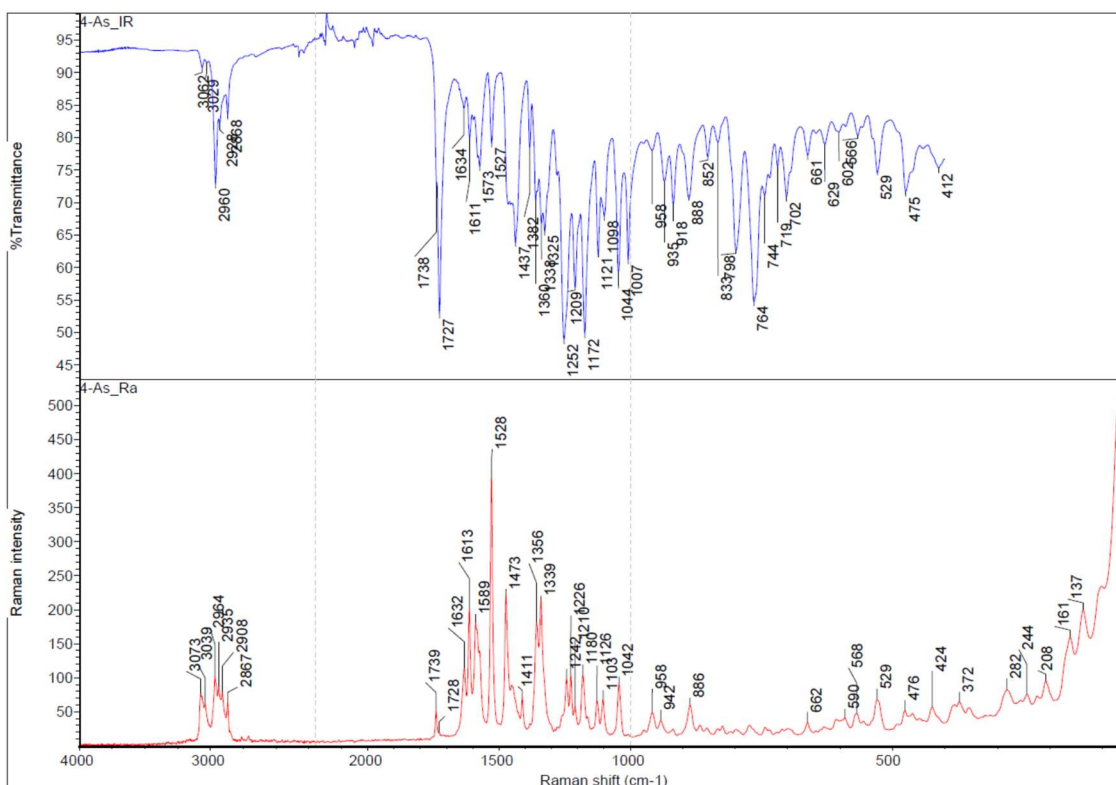

Figure S45: Infrared (top) and Raman (bottom) spectra of 4-As.

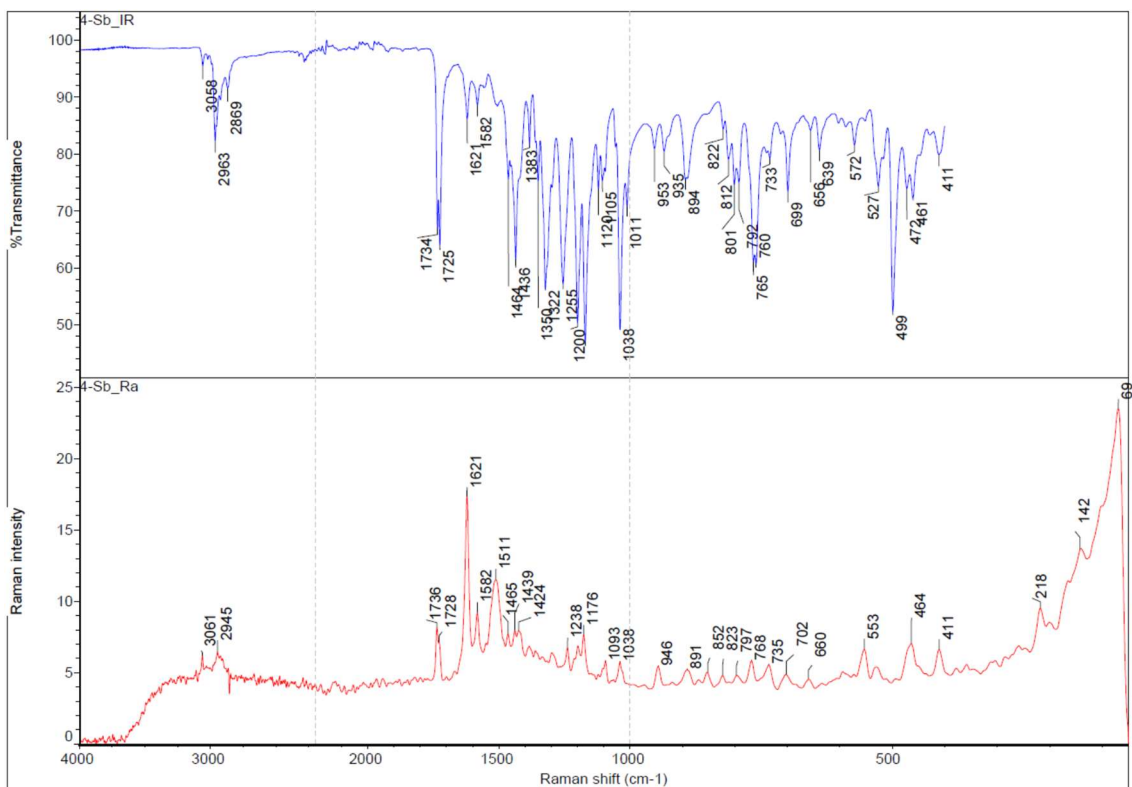

Figure S46: Infrared (top) and Raman (bottom) spectra of 4-Sb.

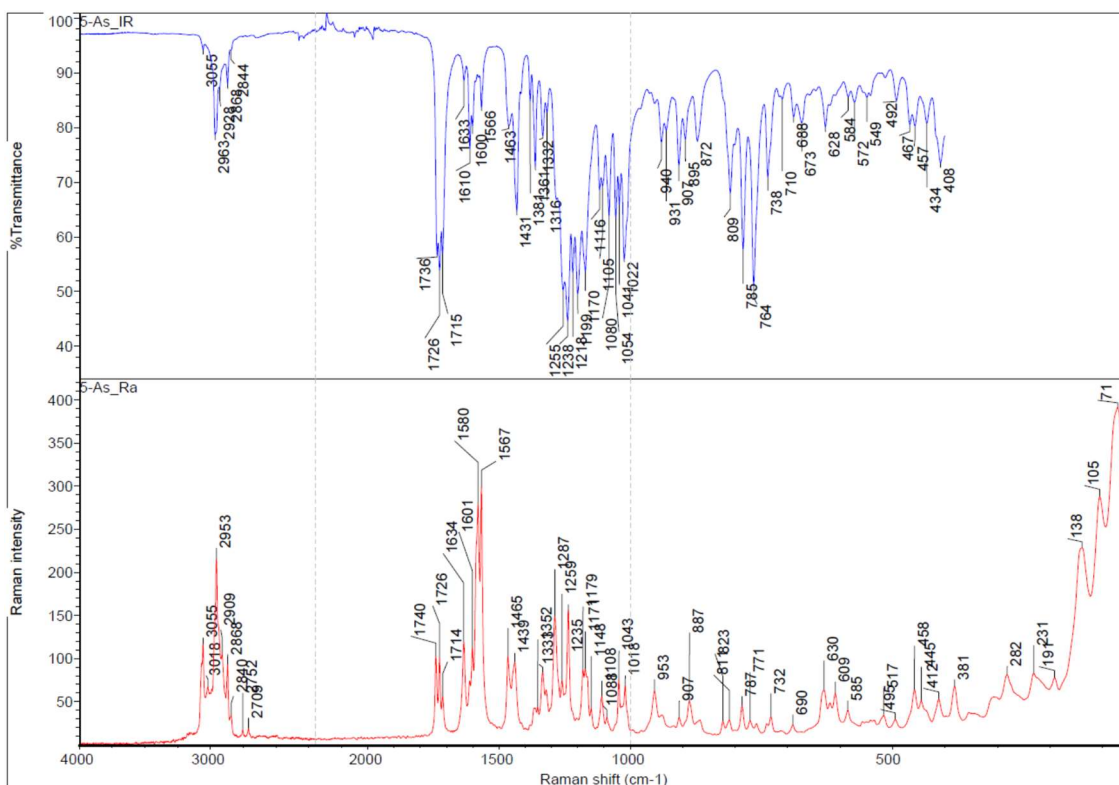

Figure S47: Infrared (top) and Raman (bottom) spectra of 5-As.

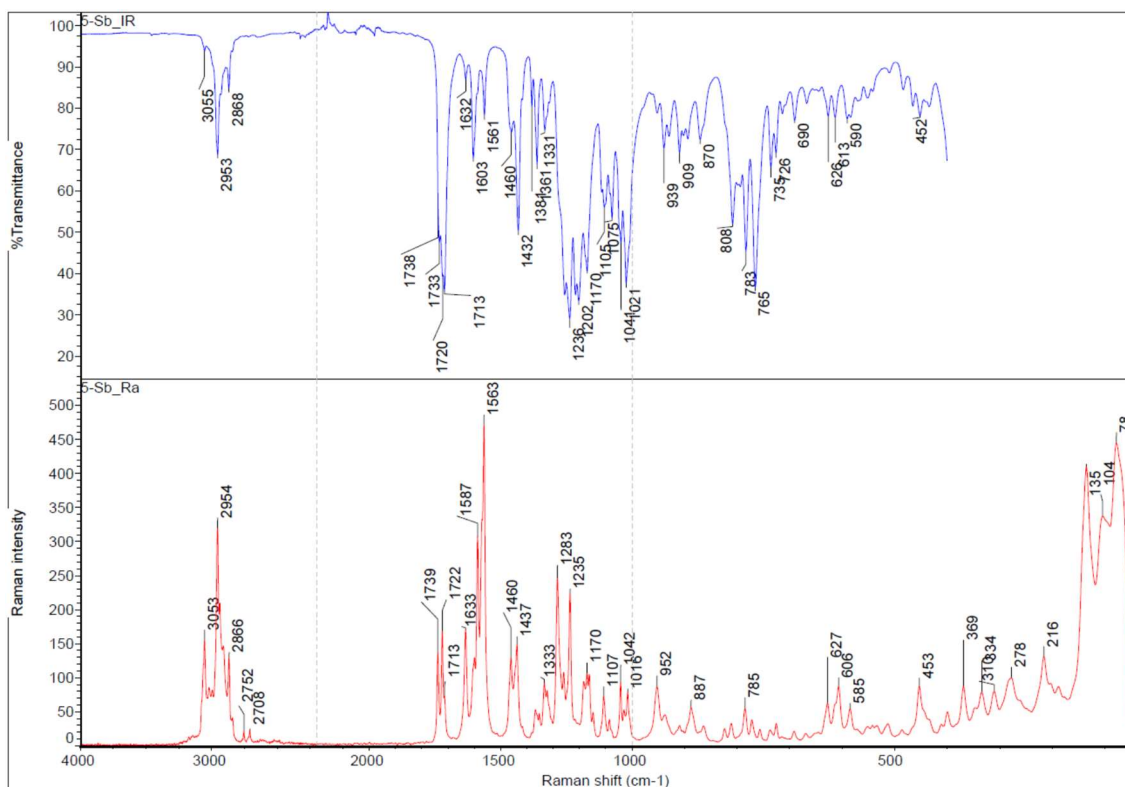

Figure S48: Infrared (top) and Raman (bottom) spectra of 5-Sb.

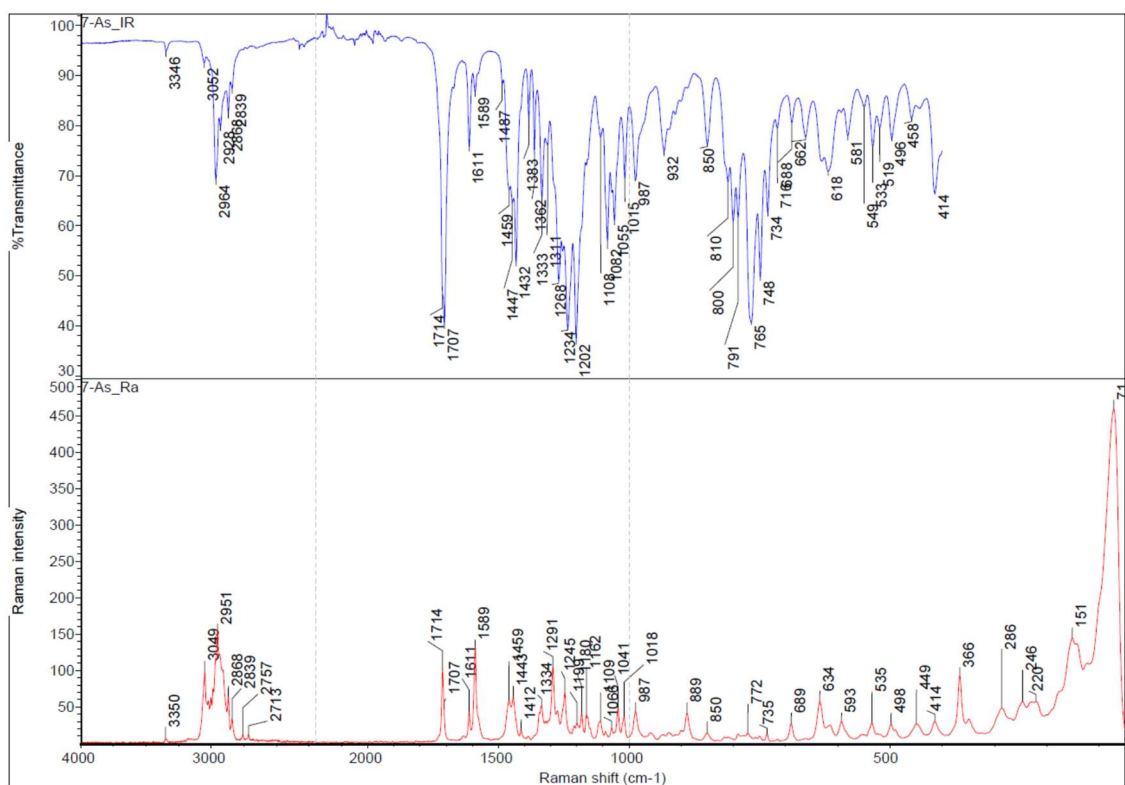

Figure S49: Infrared (top) and Raman (bottom) spectra of 7-As.



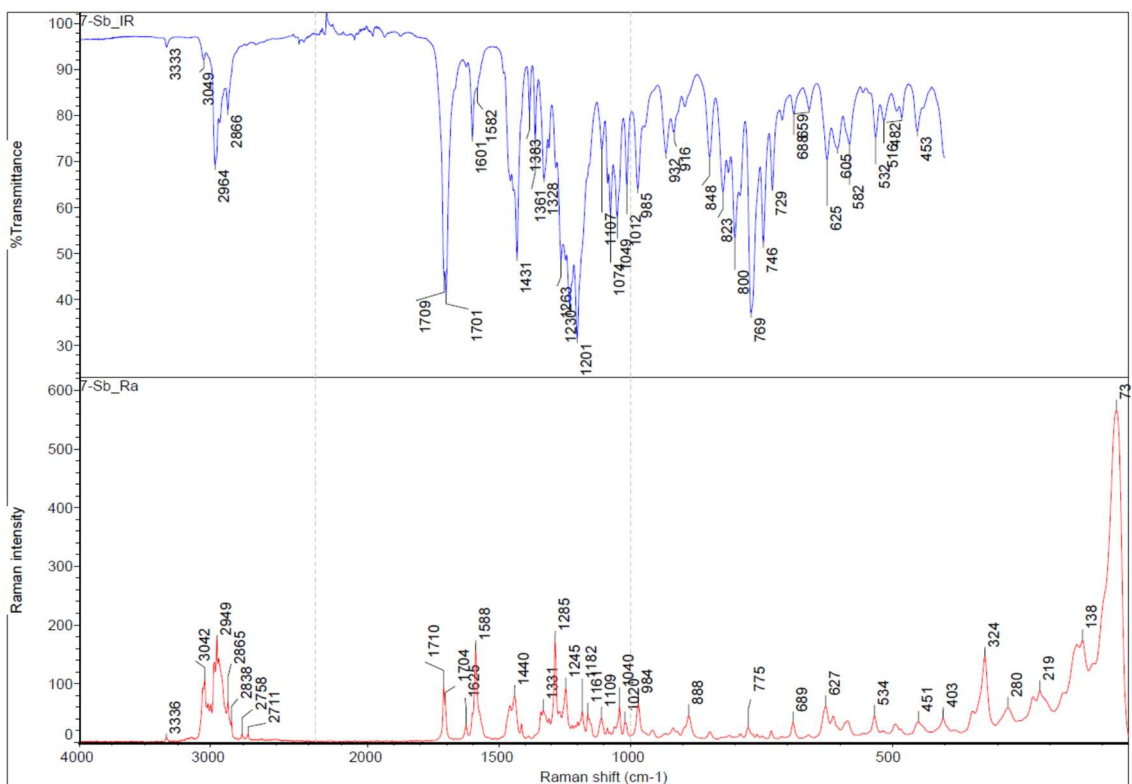

Figure S50: Infrared (top) and Raman (bottom) spectra of 7-Sb.

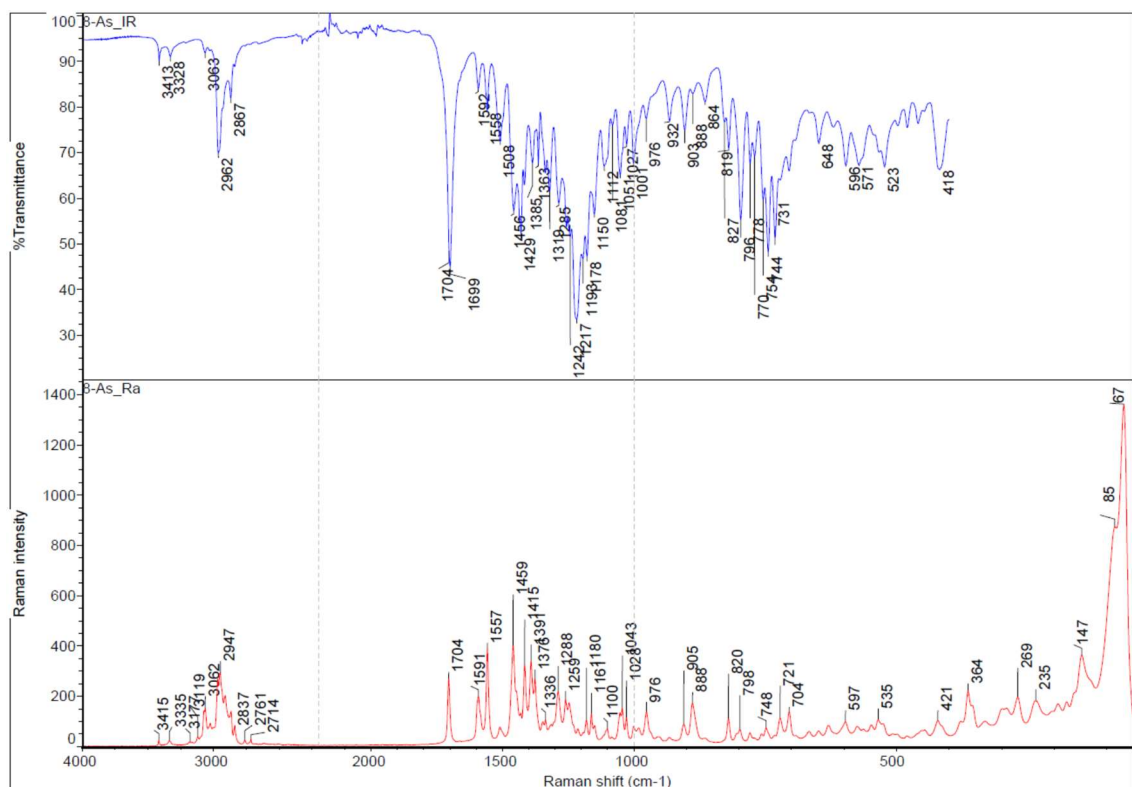

Figure S51: Infrared (top) and Raman (bottom) spectra of 8-As.

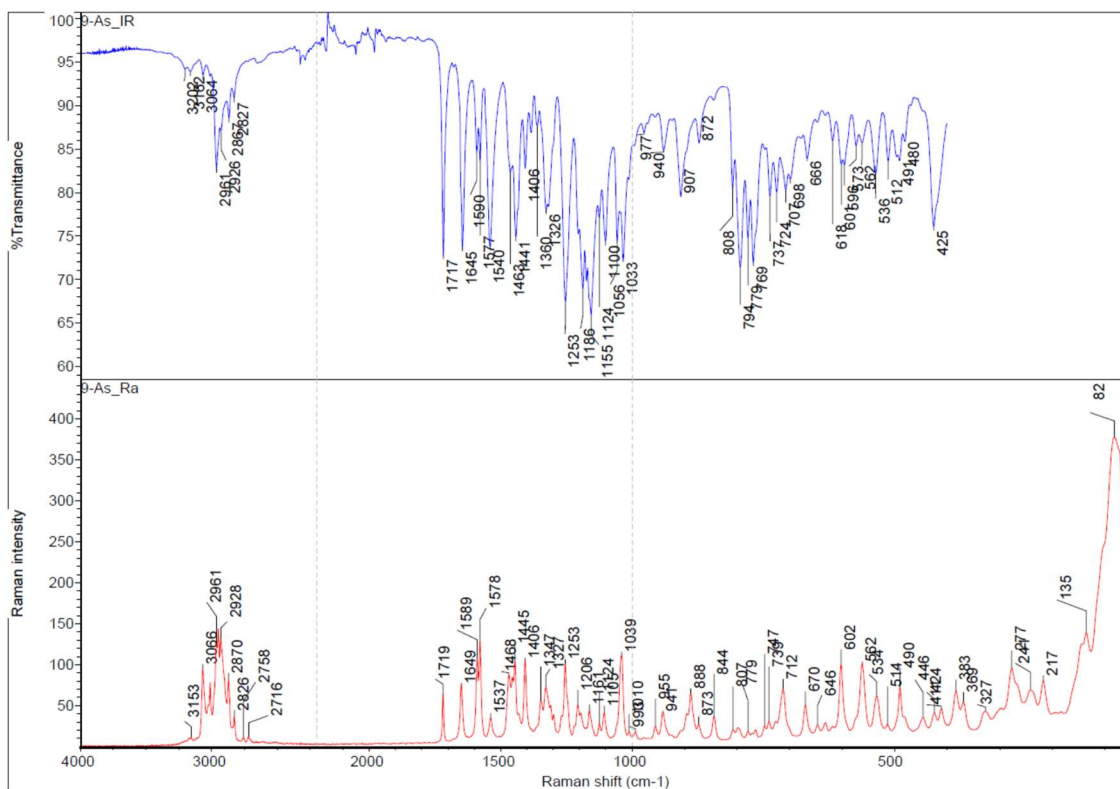

**Figure S52** Infrared (top) and Raman (bottom) spectra of **9-As**.

#### 4. Theoretical study

**Table S2.** Selected X-ray / DFT interatomic distances (Å) in the complexes studied.

| Atoms       | <b>2-As</b>        | <b>2-Sb</b>       | <b>7-Sb</b>        |
|-------------|--------------------|-------------------|--------------------|
| E(1)-C(1)   | 1.976(3) / 1.988   | 2.137(3) / 2.159  | 2.162(3) / 2.152   |
| E(1)-N(1)   | 1.858(2) / 1.858   | 2.050(3) / 2.050  | 2.0447(19) / 2.035 |
| E(1)-C(9)   | 2.013(3) / 2.022   | 2.203(3) / 2.211  | 2.196(3) / 2.210   |
| E(1)-N(2)   | 3.015(2) / 3.006   | 2.907(3) / 2.982  | 3.123(2) / 3.221   |
| C(8)-C(9)   | 1.333(4) / 1.327   | 1.331(4) / 1.329  | 1.332(3) / 1.328   |
| C(7)-C(8)   | 1.553(4) / 1.538   | 1.556(5) / 1.541  | 1.545(3) / 1.549   |
| C(2)-C(7)   | 1.528(4) / 1.534   | 1.539(5) / 1.536  | 1.524(4) / 1.531   |
| Atoms       | <b>4-Sb</b>        | <b>5-As</b>       | <b>5-Sb</b>        |
| E(1)-C(1)   | 2.0438(19) / 2.058 | 1.963(6) / 1.982  | 2.136(4) / 2.151   |
| E(1)-N(1)   | 2.3526(17) / 2.370 | 2.936(6) / 2.997  | 2.899(4) / 2.963   |
| E(1)-N(2)   | 2.3370(17) / 2.333 | 1.874(6) / 1.861  | 2.057(4) / 2.052   |
| C(8)-C(9)   | 1.330(3) / 1.332   | 1.335(11) / 1.330 | 1.333(8) / 1.330   |
| C(7)-C(8)   | 1.493(3) / 1.489   | 1.514(9) / 1.503  | 1.508(6) / 1.500   |
| N(1)-C(7)   | 1.313(3) / 1.297   | - / -             | - / -              |
| N(2)-C(26)  | 1.297(3) / 1.290   | - / -             | - / -              |
| E(1)-C(21)  | - / -              | 2.015(7) / 2.027  | 2.211(6) / 2.209   |
| C(21)-C(20) | - / -              | 1.334(9) / 1.328  | 1.357(6) / 1.329   |
| C(22)-C(20) | - / -              | 1.542(10) / 1.541 | 1.547(7) / 1.543   |
| Atoms       | <b>8-As</b>        | <b>9-As</b>       | <b>10-Sb</b>       |
| E(1)-C(1)   | 1.8971(17) / 1.907 | 1.921(2) / 1.930  | - / 2.133          |
| E(1)-C(9)   | 1.8300(18) / 1.830 | 2.046(2) / 2.046  | - / -              |
| E(1)-N(2)   | - / -              | 1.849(2) / 1.856  | - / 2.908          |
| C(8)-C(9)   | 1.413(2) / 1.405   | 1.522(3) / 1.512  | - / 1.329          |
| C(7)-C(8)   | 1.404(2) / 1.396   | 1.395(3) / 1.391  | - / -              |
| C(2)-C(7)   | 1.451(2) / 1.450   | 1.493(4) / 1.488  | - / -              |
| C(1)-C(2)   | 1.419(2) / 1.415   |                   | - / -              |
| C(1)-C(6)   | - / -              | 1.394(3) / 1.381  | - / -              |

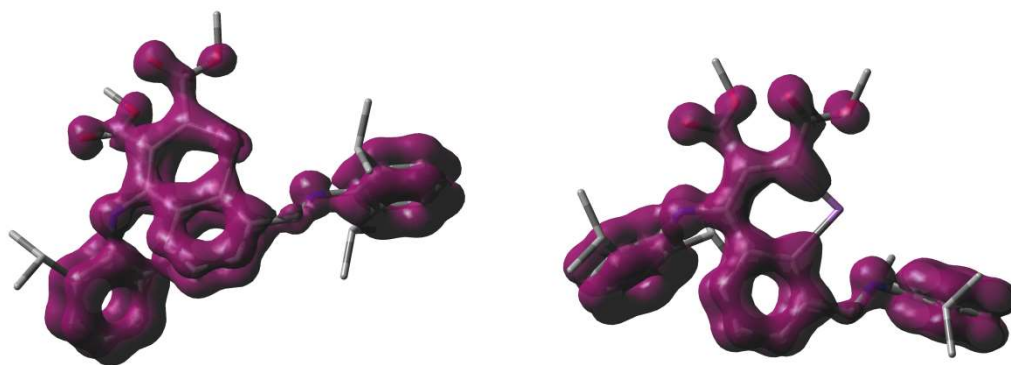

**Figure S53.** The EDDB<sub>H</sub> isosurfaces (isovalue 0.015 a.u.) of **3-As** (left) and **3-Sb** (right).

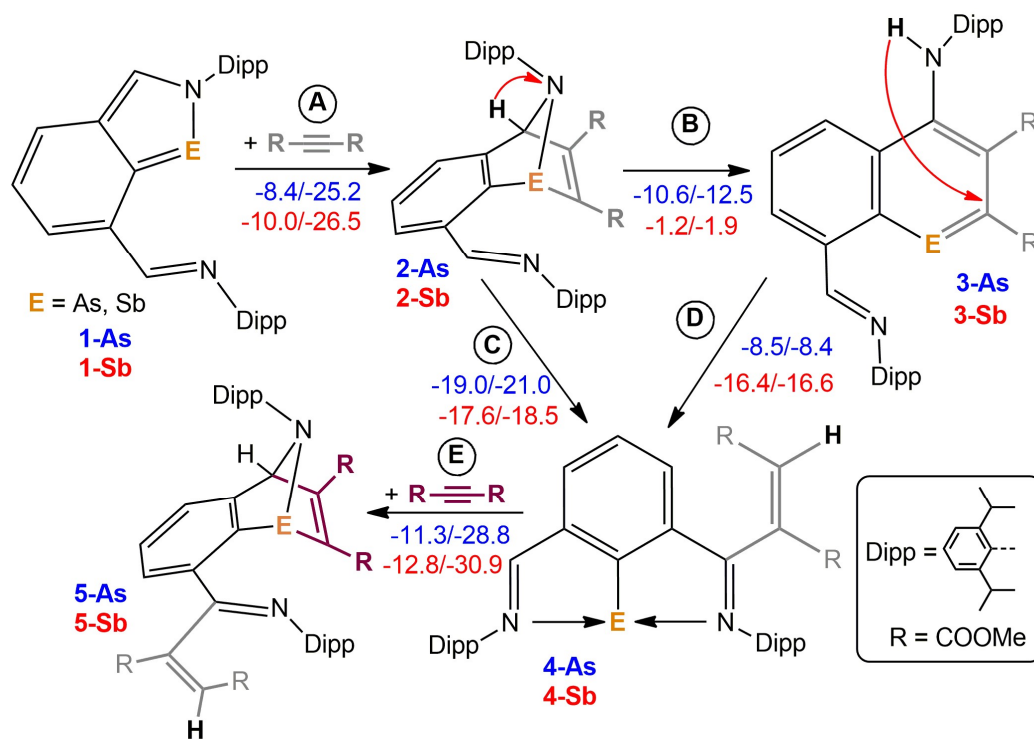

**Scheme S1.** Calculated  $\Delta G^0/\Delta H^0$  values accompanying the reactions of **1-As** (blue) and **1-Sb** (red) with DMAD in  $\text{C}_6\text{H}_6$  solution.

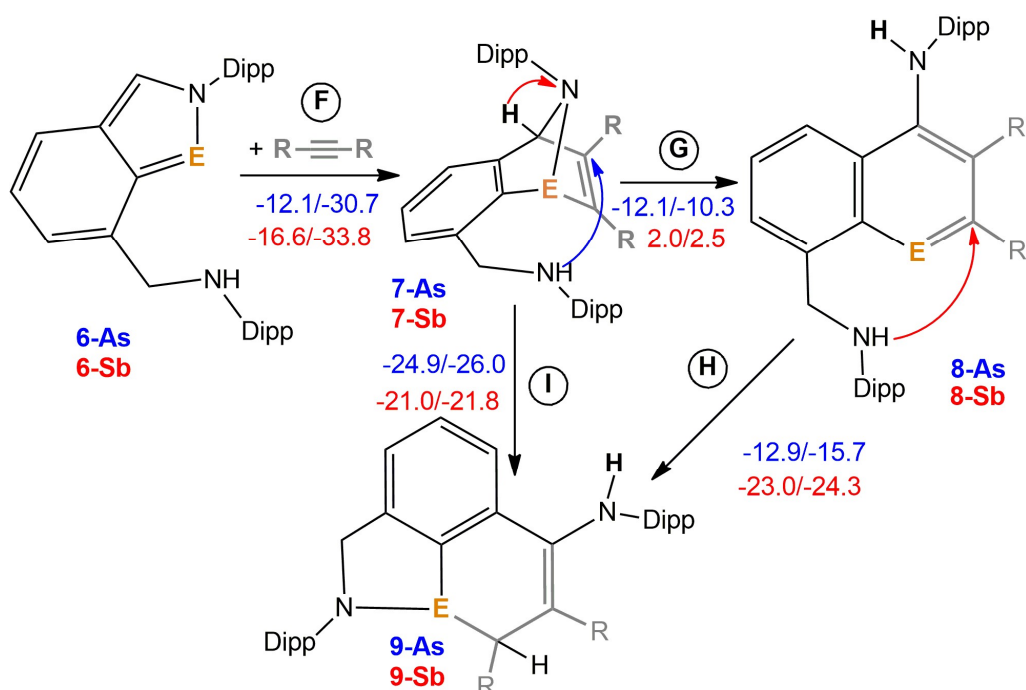

**Scheme S2.** Calculated  $\Delta G^0/\Delta H^0$  values accompanying the reactions of **6-As** (blue) and **6-Sb** (red) with DMAD in  $C_6H_6$  solution.

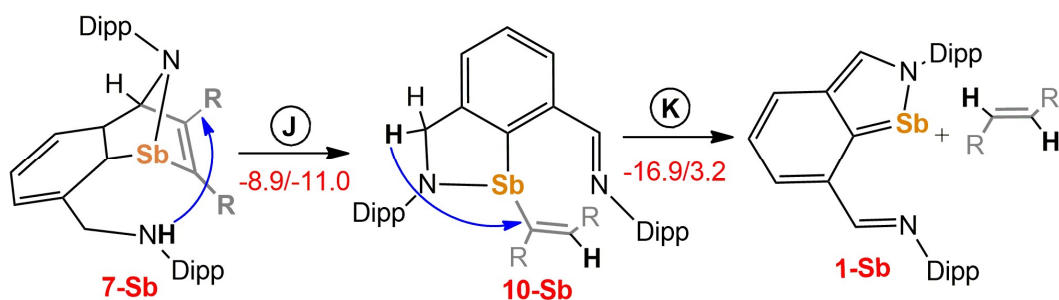

**Scheme S2.** Calculated  $\Delta G^0/\Delta H^0$  values accompanying the reactions J and K in  $C_6H_6$  solution.

**Atomic coordinates (Å) in the optimized structures of the As and Sb complexes.**

74

1-As

|   |           |           |          |
|---|-----------|-----------|----------|
| C | -1.258500 | -1.024100 | 3.620200 |
| H | -2.232900 | -1.124300 | 4.085900 |
| C | -1.181100 | -0.634800 | 2.302400 |
| C | -2.386600 | -0.357500 | 1.530500 |
| H | -3.354500 | -0.480900 | 2.029200 |
| N | -2.297200 | 0.016800  | 0.321500 |
| C | 0.084500  | -0.499900 | 1.677100 |
| C | -0.097200 | -1.294500 | 4.374100 |
| H | -0.189100 | -1.598200 | 5.408000 |
| C | 1.138900  | -1.173300 | 3.795200 |
| H | 2.037700  | -1.380800 | 4.364500 |
| C | 1.246900  | -0.776300 | 2.444600 |
| C | 2.440300  | -0.610100 | 1.718000 |

|   |           |           |           |
|---|-----------|-----------|-----------|
| H | 3.439900  | -0.764300 | 2.107800  |
| N | 2.264600  | -0.234000 | 0.464700  |
| C | 3.371700  | -0.008000 | -0.413600 |
| C | 3.838100  | -1.069300 | -1.197900 |
| C | 3.929700  | 1.274200  | -0.478600 |
| C | 4.896800  | -0.816500 | -2.065100 |
| C | 4.987200  | 1.475400  | -1.360700 |
| C | 5.468200  | 0.442600  | -2.148300 |
| H | 5.275500  | -1.618000 | -2.687700 |
| H | 5.437100  | 2.458400  | -1.433800 |
| H | 6.289400  | 0.620000  | -2.831000 |
| C | -3.464300 | 0.258900  | -0.438400 |
| C | -3.773900 | 1.591000  | -0.763100 |
| C | -4.237500 | -0.810000 | -0.911800 |
| C | -4.909200 | 1.836200  | -1.523400 |
| C | -5.367400 | -0.512500 | -1.671500 |
| C | -5.710500 | 0.793900  | -1.969400 |
| H | -5.172400 | 2.854600  | -1.778100 |
| H | -5.985400 | -1.322900 | -2.039400 |
| H | -6.593200 | 1.002900  | -2.560200 |
| C | 3.416000  | 2.426700  | 0.361600  |
| H | 2.617000  | 2.054800  | 1.003900  |
| C | 2.819800  | 3.521700  | -0.525200 |
| H | 2.011300  | 3.125000  | -1.141000 |
| H | 2.419800  | 4.329700  | 0.089800  |
| H | 3.578300  | 3.944700  | -1.187400 |
| C | 4.516200  | 2.989700  | 1.263200  |
| H | 4.934800  | 2.213600  | 1.905800  |
| H | 5.330800  | 3.414400  | 0.673400  |
| H | 4.114700  | 3.781700  | 1.897400  |
| C | 3.221200  | -2.453000 | -1.139100 |
| H | 2.463200  | -2.457000 | -0.354900 |
| C | 4.262800  | -3.516600 | -0.788400 |
| H | 3.783900  | -4.491800 | -0.688000 |
| H | 5.023200  | -3.598600 | -1.567400 |
| H | 4.765900  | -3.282200 | 0.150900  |
| C | 2.521200  | -2.786900 | -2.458200 |
| H | 2.052200  | -3.770500 | -2.399200 |
| H | 1.749400  | -2.050500 | -2.686800 |
| H | 3.236000  | -2.801300 | -3.283900 |
| C | -3.870300 | -2.256600 | -0.638000 |
| H | -2.864100 | -2.276700 | -0.217700 |
| C | -3.840500 | -3.088500 | -1.921400 |
| H | -3.179100 | -2.640900 | -2.664000 |
| H | -3.482900 | -4.096600 | -1.704800 |
| H | -4.834800 | -3.178700 | -2.362200 |
| C | -4.825800 | -2.882200 | 0.380900  |
| H | -4.820600 | -2.332600 | 1.323500  |
| H | -5.848800 | -2.874700 | -0.002400 |
| H | -4.547200 | -3.917800 | 0.584300  |

|      |           |           |           |
|------|-----------|-----------|-----------|
| C    | -2.900500 | 2.714400  | -0.242700 |
| H    | -1.880400 | 2.324700  | -0.186900 |
| C    | -2.887000 | 3.941900  | -1.149100 |
| H    | -2.131100 | 4.647800  | -0.801700 |
| H    | -2.657800 | 3.674400  | -2.181400 |
| H    | -3.847100 | 4.461900  | -1.135600 |
| C    | -3.327000 | 3.110400  | 1.174600  |
| H    | -4.353500 | 3.484900  | 1.166200  |
| H    | -3.281900 | 2.261700  | 1.858000  |
| H    | -2.678300 | 3.897300  | 1.564200  |
| As   | 0.450600  | 0.005700  | -0.086500 |
| 74   |           |           |           |
| 1-Sb |           |           |           |
| Sb   | -0.000000 | 0.027500  | -0.268600 |
| C    | -1.205700 | -0.042600 | 3.900400  |
| H    | -2.144200 | -0.053400 | 4.444000  |
| C    | -1.212200 | -0.019300 | 2.507800  |
| C    | -2.405800 | -0.013000 | 1.699700  |
| H    | -3.397500 | -0.032800 | 2.153100  |
| N    | -2.258700 | 0.011200  | 0.420300  |
| C    | -0.000000 | -0.005500 | 1.792600  |
| C    | -0.000000 | -0.052800 | 4.595500  |
| H    | -0.000000 | -0.070400 | 5.676500  |
| C    | 1.205600  | -0.042400 | 3.900400  |
| H    | 2.144200  | -0.053100 | 4.444000  |
| C    | 1.212200  | -0.019200 | 2.507800  |
| C    | 2.405800  | -0.012700 | 1.699700  |
| H    | 3.397500  | -0.032500 | 2.153100  |
| N    | 2.258700  | 0.011500  | 0.420300  |
| C    | 3.385300  | 0.005300  | -0.449600 |
| C    | 3.896300  | -1.223200 | -0.889600 |
| C    | 3.911200  | 1.228500  | -0.888300 |
| C    | 4.982600  | -1.202400 | -1.759300 |
| C    | 4.996100  | 1.196100  | -1.758500 |
| C    | 5.533100  | -0.006400 | -2.189100 |
| H    | 5.403900  | -2.138000 | -2.105500 |
| H    | 5.428100  | 2.126600  | -2.104600 |
| H    | 6.378900  | -0.010900 | -2.864600 |
| C    | -3.385300 | 0.005100  | -0.449600 |
| C    | -3.911400 | 1.228300  | -0.888000 |
| C    | -3.896000 | -1.223400 | -0.890100 |
| C    | -4.996300 | 1.196000  | -1.758200 |
| C    | -4.982200 | -1.202500 | -1.759900 |
| C    | -5.533000 | -0.006400 | -2.189200 |
| H    | -5.428400 | 2.126600  | -2.104000 |
| H    | -5.403400 | -2.138000 | -2.106500 |
| H    | -6.378800 | -0.010900 | -2.864800 |
| C    | 3.354100  | 2.547800  | -0.391300 |
| H    | 2.343200  | 2.365000  | -0.022400 |
| C    | 3.256300  | 3.601900  | -1.492500 |

|   |           |           |           |
|---|-----------|-----------|-----------|
| H | 2.704100  | 3.223000  | -2.353300 |
| H | 2.738400  | 4.484400  | -1.114200 |
| H | 4.242200  | 3.923200  | -1.833200 |
| C | 4.196200  | 3.068100  | 0.777400  |
| H | 4.223600  | 2.349000  | 1.597800  |
| H | 5.224100  | 3.246900  | 0.452800  |
| H | 3.788800  | 4.006700  | 1.157700  |
| C | 3.321800  | -2.540100 | -0.405500 |
| H | 2.334100  | -2.341800 | 0.014100  |
| C | 4.199100  | -3.123600 | 0.705800  |
| H | 3.781000  | -4.062500 | 1.073300  |
| H | 5.206000  | -3.320800 | 0.330200  |
| H | 4.284600  | -2.433300 | 1.546800  |
| C | 3.141800  | -3.552000 | -1.536300 |
| H | 2.623100  | -4.436200 | -1.162700 |
| H | 2.554800  | -3.129200 | -2.352500 |
| H | 4.101400  | -3.881100 | -1.939300 |
| C | -3.321400 | -2.540200 | -0.406200 |
| H | -2.333200 | -2.342000 | 0.012500  |
| C | -3.142400 | -3.552500 | -1.537000 |
| H | -2.556300 | -3.129800 | -2.353900 |
| H | -2.623200 | -4.436500 | -1.163700 |
| H | -4.102400 | -3.881900 | -1.938900 |
| C | -4.197900 | -3.123500 | 0.705800  |
| H | -4.282500 | -2.433000 | 1.546800  |
| H | -5.205100 | -3.320600 | 0.331100  |
| H | -3.779600 | -4.062300 | 1.073200  |
| C | -3.354600 | 2.547600  | -0.390500 |
| H | -2.343800 | 2.364700  | -0.021200 |
| C | -3.256200 | 3.601700  | -1.491700 |
| H | -2.738500 | 4.484300  | -1.113000 |
| H | -2.703500 | 3.222900  | -2.352200 |
| H | -4.241900 | 3.923000  | -1.832900 |
| C | -4.197100 | 3.067800  | 0.777800  |
| H | -5.224900 | 3.246600  | 0.452700  |
| H | -4.224900 | 2.348600  | 1.598100  |
| H | -3.790000 | 4.006300  | 1.158400  |

90

2-As

|    |           |           |           |
|----|-----------|-----------|-----------|
| As | 0.156200  | 0.154600  | -0.513600 |
| O  | 3.724400  | -2.392100 | 1.864000  |
| N  | 1.893200  | 0.697800  | -0.140200 |
| C  | -0.070600 | 0.198900  | 1.460500  |
| O  | 2.686700  | -3.864800 | 0.530800  |
| N  | -2.698300 | -0.014900 | 0.412800  |
| C  | 1.186800  | 0.101100  | 2.044500  |
| C  | 1.331700  | 0.174700  | 3.416300  |
| H  | 2.309100  | 0.086500  | 3.875300  |
| O  | 0.830900  | -3.273900 | -1.981300 |
| C  | 0.194000  | 0.369300  | 4.204200  |



|   |           |           |           |
|---|-----------|-----------|-----------|
| H | 0.293700  | 0.447100  | 5.279000  |
| O | -0.535300 | -3.542800 | -0.224300 |
| C | -1.060100 | 0.448100  | 3.623500  |
| H | -1.939700 | 0.578800  | 4.243400  |
| C | -1.207200 | 0.340600  | 2.234600  |
| C | 2.269100  | -0.143400 | 0.985100  |
| H | 3.283000  | 0.033700  | 1.335500  |
| C | 0.942200  | -1.692600 | -0.272500 |
| C | 2.015000  | -1.581200 | 0.500500  |
| C | 2.820700  | -2.742400 | 0.943000  |
| C | 0.340600  | -2.942700 | -0.789900 |
| C | 4.544700  | -3.454600 | 2.354000  |
| H | 3.926800  | -4.219500 | 2.821600  |
| H | 5.213800  | -3.003900 | 3.080000  |
| H | 5.108400  | -3.900000 | 1.535700  |
| C | 0.297000  | -4.473100 | -2.548200 |
| H | -0.781400 | -4.383300 | -2.672100 |
| H | 0.519000  | -5.319200 | -1.899700 |
| H | 0.785600  | -4.588300 | -3.510400 |
| C | 2.684900  | 1.765200  | -0.620200 |
| C | 2.272900  | 3.101500  | -0.450300 |
| C | 3.077500  | 4.117800  | -0.957800 |
| H | 2.762400  | 5.148400  | -0.849500 |
| C | 4.284200  | 3.839300  | -1.576500 |
| H | 4.903900  | 4.645400  | -1.948200 |
| C | 4.693200  | 2.524000  | -1.717400 |
| H | 5.636600  | 2.308300  | -2.205200 |
| C | 3.901200  | 1.472700  | -1.268900 |
| C | 0.983600  | 3.464100  | 0.260900  |
| H | 0.657100  | 2.589100  | 0.822500  |
| C | 1.171800  | 4.591300  | 1.277700  |
| H | 0.252100  | 4.730000  | 1.848700  |
| H | 1.400700  | 5.540600  | 0.790600  |
| H | 1.978500  | 4.362900  | 1.975200  |
| C | -0.114200 | 3.833800  | -0.741100 |
| H | -0.298600 | 3.030100  | -1.456000 |
| H | 0.173900  | 4.722900  | -1.307300 |
| H | -1.050200 | 4.051100  | -0.221300 |
| C | 4.359600  | 0.047100  | -1.506000 |
| H | 3.538300  | -0.614800 | -1.235100 |
| C | -2.541800 | 0.337300  | 1.617600  |
| H | -3.388700 | 0.626400  | 2.251100  |
| C | -3.981800 | 0.008400  | -0.175300 |
| C | -4.660800 | 1.214400  | -0.396200 |
| C | -5.920300 | 1.151200  | -0.992100 |
| H | -6.468000 | 2.070100  | -1.165500 |
| C | -6.477500 | -0.055100 | -1.373600 |
| H | -7.458700 | -0.079700 | -1.830400 |
| C | -5.765700 | -1.233900 | -1.190600 |
| H | -6.195700 | -2.172100 | -1.517500 |

|   |           |           |           |
|---|-----------|-----------|-----------|
| C | -4.509300 | -1.223800 | -0.603200 |
| C | -4.060600 | 2.569700  | -0.068600 |
| H | -3.030800 | 2.419600  | 0.258500  |
| C | -4.009500 | 3.466300  | -1.308100 |
| H | -5.012500 | 3.706400  | -1.665400 |
| H | -3.467600 | 2.979800  | -2.120100 |
| H | -3.507000 | 4.406600  | -1.074000 |
| C | -4.821800 | 3.261600  | 1.063600  |
| H | -5.859700 | 3.441500  | 0.774600  |
| H | -4.365700 | 4.225100  | 1.298900  |
| H | -4.830300 | 2.653100  | 1.969100  |
| C | -3.712100 | -2.489000 | -0.373300 |
| H | -2.656400 | -2.221700 | -0.460800 |
| C | -4.000500 | -3.589400 | -1.388800 |
| H | -4.999300 | -4.011300 | -1.256200 |
| H | -3.281400 | -4.398800 | -1.254200 |
| H | -3.919000 | -3.221000 | -2.412900 |
| C | -3.925600 | -3.014600 | 1.049300  |
| H | -4.966700 | -3.317600 | 1.187200  |
| H | -3.692300 | -2.253400 | 1.794900  |
| H | -3.283300 | -3.877500 | 1.232300  |
| C | 5.572300  | -0.305200 | -0.640300 |
| H | 6.425500  | 0.325000  | -0.902100 |
| H | 5.861600  | -1.346600 | -0.796200 |
| H | 5.366900  | -0.164000 | 0.422100  |
| C | 4.669100  | -0.207000 | -2.983000 |
| H | 3.819100  | 0.058900  | -3.612400 |
| H | 4.897600  | -1.262200 | -3.141900 |
| H | 5.532100  | 0.373800  | -3.314300 |

90

2-Sb

|    |           |           |           |
|----|-----------|-----------|-----------|
| Sb | -0.019400 | 0.163600  | -0.697400 |
| O  | 2.711700  | -3.761200 | 0.886400  |
| N  | 1.890300  | 0.745400  | -0.229800 |
| C  | -0.176500 | 0.354600  | 1.447000  |
| O  | 3.626100  | -2.131700 | 2.119500  |
| N  | -2.773200 | 0.063200  | 0.442800  |
| C  | 1.094500  | 0.284600  | 2.000300  |
| C  | 1.266600  | 0.429800  | 3.367100  |
| H  | 2.255000  | 0.365600  | 3.807300  |
| O  | -0.446000 | -3.693400 | -0.045300 |
| C  | 0.149700  | 0.657900  | 4.173400  |
| H  | 0.277700  | 0.790600  | 5.240000  |
| O  | 1.052000  | -3.551600 | -1.706800 |
| C  | -1.122400 | 0.691900  | 3.624300  |
| H  | -1.988000 | 0.836500  | 4.260800  |
| C  | -1.292800 | 0.517200  | 2.247000  |
| C  | 2.183300  | -0.036800 | 0.964900  |
| H  | 3.186100  | 0.148400  | 1.344600  |
| C  | 1.957800  | -1.515900 | 0.598200  |

|   |           |           |           |
|---|-----------|-----------|-----------|
| C | 0.930400  | -1.771700 | -0.204700 |
| C | 2.783300  | -2.599500 | 1.192100  |
| C | 4.463900  | -3.109400 | 2.737800  |
| H | 3.857300  | -3.869900 | 3.226700  |
| H | 5.063400  | -2.570000 | 3.464400  |
| H | 5.099800  | -3.582400 | 1.990800  |
| C | 0.447400  | -3.109600 | -0.604300 |
| C | 0.650500  | -4.851800 | -2.141800 |
| H | -0.411800 | -4.859700 | -2.382500 |
| H | 0.849400  | -5.581800 | -1.358500 |
| H | 1.244200  | -5.065800 | -3.024900 |
| C | 2.780300  | 1.750000  | -0.666700 |
| C | 2.449000  | 3.114400  | -0.537300 |
| C | 3.350100  | 4.072700  | -0.992500 |
| H | 3.096500  | 5.122600  | -0.910900 |
| C | 4.575200  | 3.711700  | -1.527100 |
| H | 5.269400  | 4.472300  | -1.861400 |
| C | 4.904800  | 2.370900  | -1.632900 |
| H | 5.862500  | 2.088300  | -2.054900 |
| C | 4.018900  | 1.377600  | -1.229500 |
| C | 1.134700  | 3.561700  | 0.071700  |
| H | 0.726200  | 2.717500  | 0.627600  |
| C | 1.302800  | 4.705500  | 1.072700  |
| H | 1.614700  | 5.629400  | 0.582500  |
| H | 2.043600  | 4.457200  | 1.833800  |
| H | 0.352300  | 4.904400  | 1.570900  |
| C | 0.134100  | 3.957600  | -1.018700 |
| H | -0.011300 | 3.158200  | -1.748100 |
| H | 0.496500  | 4.833400  | -1.562400 |
| H | -0.836200 | 4.205500  | -0.582500 |
| C | 4.399700  | -0.076900 | -1.423700 |
| H | 3.525300  | -0.681100 | -1.186000 |
| C | 5.541200  | -0.490900 | -0.491200 |
| H | 5.767600  | -1.552300 | -0.614800 |
| H | 5.290800  | -0.315600 | 0.556300  |
| H | 6.447300  | 0.075900  | -0.718300 |
| C | 4.768600  | -0.372600 | -2.879300 |
| H | 3.966600  | -0.073300 | -3.555200 |
| H | 4.949200  | -1.440800 | -3.011800 |
| H | 5.675600  | 0.158100  | -3.175000 |
| C | -2.632700 | 0.431300  | 1.646700  |
| H | -3.494200 | 0.659700  | 2.284300  |
| C | -4.051700 | -0.028100 | -0.148500 |
| C | -4.866800 | 1.099900  | -0.316300 |
| C | -6.106700 | 0.919700  | -0.930200 |
| H | -6.757700 | 1.775400  | -1.065000 |
| C | -6.517300 | -0.322700 | -1.375200 |
| H | -7.486300 | -0.438400 | -1.843800 |
| C | -5.676900 | -1.419700 | -1.235900 |
| H | -5.996800 | -2.385000 | -1.605900 |

|   |           |           |           |
|---|-----------|-----------|-----------|
| C | -4.433500 | -1.293700 | -0.633800 |
| C | -4.443800 | 2.499800  | 0.090200  |
| H | -3.413300 | 2.462800  | 0.444100  |
| C | -4.470600 | 3.456200  | -1.104900 |
| H | -3.840700 | 3.087700  | -1.915500 |
| H | -4.107300 | 4.441200  | -0.806600 |
| H | -5.483200 | 3.578300  | -1.493000 |
| C | -5.315700 | 3.037200  | 1.227100  |
| H | -6.357700 | 3.112600  | 0.909000  |
| H | -4.982800 | 4.032100  | 1.527800  |
| H | -5.283200 | 2.383500  | 2.100200  |
| C | -3.509100 | -2.477400 | -0.438900 |
| H | -2.483300 | -2.107500 | -0.522900 |
| C | -3.691100 | -3.578300 | -1.478000 |
| H | -4.647400 | -4.091500 | -1.355900 |
| H | -2.901300 | -4.320100 | -1.352300 |
| H | -3.642500 | -3.184900 | -2.494900 |
| C | -3.658900 | -3.057100 | 0.970800  |
| H | -4.664000 | -3.465700 | 1.102200  |
| H | -3.498100 | -2.296600 | 1.735600  |
| H | -2.929600 | -3.853400 | 1.123500  |

90

3-As

|    |           |           |           |
|----|-----------|-----------|-----------|
| As | -1.061000 | 1.470000  | -0.450200 |
| H  | 4.092000  | 0.767900  | -0.160900 |
| N  | 3.394500  | 0.048700  | -0.288400 |
| O  | 4.007700  | 2.650100  | 0.396100  |
| C  | -0.241000 | -0.171700 | -0.996300 |
| O  | 2.371300  | 3.129700  | 1.834800  |
| C  | 1.154800  | -0.335200 | -1.127500 |
| C  | 1.650100  | -1.395400 | -1.925100 |
| H  | 2.712800  | -1.469200 | -2.103200 |
| O  | 1.238400  | 4.621000  | -0.239500 |
| C  | 0.810700  | -2.308200 | -2.505700 |
| H  | 1.210100  | -3.090700 | -3.136400 |
| O  | -0.790900 | 4.205900  | 0.601700  |
| C  | -0.562000 | -2.236400 | -2.252500 |
| H  | -1.229000 | -2.995200 | -2.645200 |
| C  | 3.801800  | -1.273200 | 0.036600  |
| C  | 2.118000  | 0.526100  | -0.462000 |
| C  | 4.965700  | -1.750200 | -0.599800 |
| C  | 5.404400  | -3.034600 | -0.311900 |
| H  | 6.293400  | -3.416700 | -0.795500 |
| C  | 4.706400  | -3.845800 | 0.571000  |
| H  | 5.050800  | -4.851600 | 0.774600  |
| C  | 3.575700  | -3.357300 | 1.196300  |
| H  | 3.044500  | -3.985500 | 1.901300  |
| C  | 3.108900  | -2.063400 | 0.965600  |
| C  | 5.724100  | -0.855400 | -1.560300 |
| H  | 4.983300  | -0.251000 | -2.091800 |

|   |           |           |           |
|---|-----------|-----------|-----------|
| C | 6.648100  | 0.098300  | -0.790900 |
| H | 7.415900  | -0.475900 | -0.267600 |
| H | 6.118700  | 0.694200  | -0.045400 |
| H | 7.142400  | 0.787900  | -1.477000 |
| C | 6.532100  | -1.620600 | -2.604700 |
| H | 7.381400  | -2.137300 | -2.153500 |
| H | 6.931300  | -0.923100 | -3.342000 |
| H | 5.920500  | -2.358500 | -3.126000 |
| C | 1.914500  | -1.587800 | 1.775000  |
| H | 1.680900  | -0.559700 | 1.508000  |
| C | 2.242600  | -1.582800 | 3.271000  |
| H | 2.453400  | -2.591000 | 3.632400  |
| H | 1.395000  | -1.193100 | 3.837800  |
| H | 3.113100  | -0.959800 | 3.480900  |
| C | 0.670400  | -2.438500 | 1.500800  |
| H | 0.800000  | -3.450400 | 1.891500  |
| H | 0.462100  | -2.515000 | 0.432600  |
| H | -0.203200 | -1.999800 | 1.988200  |
| C | 1.793900  | 1.798100  | -0.004200 |
| C | 0.502500  | 2.360200  | -0.092800 |
| C | 2.846500  | 2.571800  | 0.723000  |
| C | 3.264800  | 4.011700  | 2.514700  |
| H | 2.726800  | 4.358800  | 3.391400  |
| H | 3.520300  | 4.846900  | 1.863200  |
| H | 4.171900  | 3.484200  | 2.804000  |
| C | 0.386200  | 3.834100  | 0.090400  |
| C | -1.003500 | 5.613800  | 0.696400  |
| H | -0.264800 | 6.060400  | 1.360500  |
| H | -2.003500 | 5.735600  | 1.100700  |
| H | -0.926100 | 6.075100  | -0.287000 |
| C | -2.516800 | -1.282200 | -1.185000 |
| H | -3.111000 | -1.956500 | -1.814100 |
| N | -3.029300 | -0.675600 | -0.202000 |
| C | -4.405000 | -0.822500 | 0.076700  |
| C | -4.743300 | -1.430900 | 1.299800  |
| C | -5.385600 | -0.323600 | -0.791500 |
| C | -6.086200 | -1.580800 | 1.612100  |
| C | -6.721700 | -0.496700 | -0.430100 |
| C | -7.074900 | -1.125400 | 0.749100  |
| H | -6.370700 | -2.054700 | 2.542500  |
| H | -7.497600 | -0.124200 | -1.088500 |
| H | -8.118900 | -1.250800 | 1.006000  |
| C | -5.053000 | 0.425300  | -2.068500 |
| H | -3.972700 | 0.565400  | -2.116100 |
| C | -5.684700 | 1.819500  | -2.074900 |
| H | -5.386500 | 2.388000  | -1.193400 |
| H | -5.370900 | 2.370700  | -2.963000 |
| H | -6.774600 | 1.759800  | -2.088100 |
| C | -5.485700 | -0.364800 | -3.305300 |
| H | -5.008200 | -1.345300 | -3.339900 |

|   |           |           |           |
|---|-----------|-----------|-----------|
| H | -6.566400 | -0.522100 | -3.302400 |
| H | -5.226100 | 0.177700  | -4.216000 |
| C | -3.642900 | -1.944700 | 2.205900  |
| H | -2.806700 | -1.245800 | 2.110100  |
| C | -3.156700 | -3.320200 | 1.735400  |
| H | -2.348500 | -3.680100 | 2.375200  |
| H | -3.975500 | -4.042300 | 1.779400  |
| H | -2.786700 | -3.286600 | 0.709800  |
| C | -4.045500 | -2.008300 | 3.676100  |
| H | -3.173100 | -2.245100 | 4.286800  |
| H | -4.458500 | -1.059400 | 4.021000  |
| H | -4.787600 | -2.789300 | 3.854300  |
| C | -1.081600 | -1.205700 | -1.499200 |

90

3-Sb

|   |           |           |           |
|---|-----------|-----------|-----------|
| H | 4.153300  | 0.662100  | -0.339800 |
| N | 3.435500  | -0.046300 | -0.374800 |
| O | 4.119600  | 2.583900  | 0.148800  |
| C | -0.216900 | -0.355500 | -0.973200 |
| O | 2.588900  | 3.033000  | 1.708300  |
| C | 1.181400  | -0.458000 | -1.140700 |
| C | 1.698200  | -1.535100 | -1.905700 |
| H | 2.757500  | -1.567200 | -2.114700 |
| O | 1.464800  | 4.589400  | -0.320300 |
| C | 0.890300  | -2.519500 | -2.411300 |
| H | 1.312300  | -3.314200 | -3.011600 |
| O | -0.606400 | 4.277000  | 0.462300  |
| C | -0.475300 | -2.499800 | -2.120500 |
| H | -1.117800 | -3.308000 | -2.450800 |
| C | 3.824200  | -1.336600 | 0.068600  |
| C | 2.154200  | 0.445800  | -0.535400 |
| C | 4.970500  | -1.893000 | -0.535900 |
| C | 5.400900  | -3.147200 | -0.126800 |
| H | 6.277800  | -3.587700 | -0.582300 |
| C | 4.711400  | -3.857400 | 0.845000  |
| H | 5.050400  | -4.840200 | 1.145900  |
| C | 3.594100  | -3.296000 | 1.431800  |
| H | 3.068800  | -3.843700 | 2.205100  |
| C | 3.135600  | -2.027100 | 1.078400  |
| C | 5.724600  | -1.113300 | -1.595500 |
| H | 4.986900  | -0.538400 | -2.163000 |
| C | 6.695600  | -0.119400 | -0.944400 |
| H | 7.447800  | -0.663300 | -0.368800 |
| H | 6.197900  | 0.574200  | -0.264200 |
| H | 7.206800  | 0.470500  | -1.707000 |
| C | 6.477900  | -1.999200 | -2.584100 |
| H | 7.327400  | -2.495600 | -2.111500 |
| H | 6.869900  | -1.389400 | -3.398800 |
| H | 5.828500  | -2.765600 | -3.009900 |
| C | 1.954500  | -1.468100 | 1.853700  |

|   |           |           |           |
|---|-----------|-----------|-----------|
| H | 1.705200  | -0.478200 | 1.479900  |
| C | 2.311000  | -1.294400 | 3.333000  |
| H | 2.544100  | -2.254200 | 3.797600  |
| H | 1.470000  | -0.853400 | 3.871400  |
| H | 3.176500  | -0.641200 | 3.453000  |
| C | 0.713300  | -2.351700 | 1.697100  |
| H | 0.845500  | -3.303900 | 2.216100  |
| H | 0.506400  | -2.568000 | 0.648000  |
| H | -0.162500 | -1.855800 | 2.122700  |
| C | 1.874800  | 1.741100  | -0.114100 |
| C | 0.611200  | 2.365800  | -0.171700 |
| C | 2.985200  | 2.497700  | 0.554700  |
| C | 3.529600  | 3.902400  | 2.337900  |
| H | 3.047500  | 4.253600  | 3.245000  |
| H | 3.756300  | 4.736000  | 1.673900  |
| H | 4.446200  | 3.364700  | 2.574000  |
| C | 0.573200  | 3.836300  | -0.009500 |
| C | -0.752100 | 5.693400  | 0.532200  |
| H | -0.005400 | 6.115600  | 1.203200  |
| H | -1.752200 | 5.870000  | 0.916400  |
| H | -0.635800 | 6.137200  | -0.455600 |
| C | -2.438200 | -1.544700 | -1.063100 |
| H | -3.010000 | -2.339300 | -1.556900 |
| N | -2.968500 | -0.788000 | -0.198700 |
| C | -4.338000 | -0.915200 | 0.123100  |
| C | -4.649300 | -1.331200 | 1.430000  |
| C | -5.336700 | -0.572500 | -0.797800 |
| C | -5.985600 | -1.451400 | 1.781900  |
| C | -6.664900 | -0.705300 | -0.393600 |
| C | -6.992200 | -1.148300 | 0.874100  |
| H | -6.250500 | -1.779600 | 2.778600  |
| H | -7.455900 | -0.450000 | -1.088900 |
| H | -8.030500 | -1.246300 | 1.163600  |
| C | -5.033700 | -0.026500 | -2.180900 |
| H | -3.954100 | 0.090200  | -2.279900 |
| C | -5.653400 | 1.359500  | -2.374400 |
| H | -5.314400 | 2.049600  | -1.600900 |
| H | -5.370300 | 1.765600  | -3.347000 |
| H | -6.743200 | 1.313800  | -2.335200 |
| C | -5.504200 | -0.986400 | -3.275500 |
| H | -5.039100 | -1.968000 | -3.171100 |
| H | -6.586500 | -1.124500 | -3.229700 |
| H | -5.257300 | -0.590300 | -4.262000 |
| C | -3.529200 | -1.682100 | 2.388000  |
| H | -2.695700 | -1.011400 | 2.157500  |
| C | -3.050200 | -3.118300 | 2.149300  |
| H | -2.232500 | -3.368000 | 2.828300  |
| H | -3.868700 | -3.819700 | 2.326600  |
| H | -2.696000 | -3.259700 | 1.127100  |
| C | -3.900700 | -1.489700 | 3.855100  |

|      |           |           |           |
|------|-----------|-----------|-----------|
| H    | -3.012900 | -1.607500 | 4.478100  |
| H    | -4.318200 | -0.498400 | 4.036100  |
| H    | -4.629200 | -2.233300 | 4.185100  |
| C    | -1.015200 | -1.447100 | -1.411000 |
| Sb   | -1.186300 | 1.435700  | -0.407400 |
| 90   |           |           |           |
| 4-As |           |           |           |
| O    | -5.067600 | -0.968600 | -0.897800 |
| N    | -1.250200 | -0.500000 | 0.083400  |
| C    | 0.577900  | 0.791300  | -1.056200 |
| O    | -3.364000 | -1.666300 | -2.174700 |
| N    | 3.216000  | 0.413700  | -0.213300 |
| C    | -0.730600 | 1.053700  | -1.532300 |
| O    | -4.414200 | 3.794500  | -0.852600 |
| C    | -0.931100 | 1.944800  | -2.609000 |
| H    | -1.934500 | 2.124100  | -2.976900 |
| C    | 0.140300  | 2.567800  | -3.190300 |
| H    | -0.008400 | 3.248600  | -4.017200 |
| O    | -2.390700 | 3.170400  | -0.131400 |
| C    | 1.445900  | 2.320200  | -2.716700 |
| H    | 2.288500  | 2.817500  | -3.184200 |
| C    | 1.670200  | 1.452600  | -1.673900 |
| C    | -1.729000 | 0.333400  | -0.843500 |
| C    | -2.848400 | -0.621100 | 1.925000  |
| C    | -2.130100 | -1.276100 | 0.913300  |
| C    | -3.729900 | -1.376300 | 2.692100  |
| H    | -4.293100 | -0.893100 | 3.480700  |
| C    | -3.887300 | -2.733500 | 2.471200  |
| H    | -4.578700 | -3.305400 | 3.077100  |
| C    | -3.147300 | -3.364100 | 1.484900  |
| H    | -3.264400 | -4.429600 | 1.332900  |
| C    | -2.251600 | -2.657000 | 0.686300  |
| C    | -2.636200 | 0.843500  | 2.252000  |
| H    | -2.102500 | 1.318600  | 1.430700  |
| C    | -3.950900 | 1.600100  | 2.447200  |
| H    | -3.752100 | 2.671800  | 2.505100  |
| H    | -4.449200 | 1.306600  | 3.373200  |
| H    | -4.644500 | 1.419600  | 1.623300  |
| C    | -1.756700 | 0.967800  | 3.500700  |
| H    | -0.795200 | 0.474100  | 3.351200  |
| H    | -2.248100 | 0.509700  | 4.362400  |
| H    | -1.571000 | 2.018800  | 3.728600  |
| C    | -1.416400 | -3.393700 | -0.343200 |
| H    | -1.032700 | -2.660600 | -1.054200 |
| C    | -2.210900 | -4.434900 | -1.132300 |
| H    | -3.095900 | -3.997000 | -1.590400 |
| H    | -2.512500 | -5.273100 | -0.501300 |
| H    | -1.583300 | -4.840000 | -1.927600 |
| C    | -0.228300 | -4.074100 | 0.347500  |
| H    | 0.406600  | -4.565100 | -0.392400 |



|      |           |           |           |
|------|-----------|-----------|-----------|
| H    | -0.586300 | -4.832400 | 1.048200  |
| H    | 0.381500  | -3.361300 | 0.901800  |
| C    | -3.179900 | 0.435600  | -1.073200 |
| C    | -3.920400 | 1.546000  | -1.035600 |
| H    | -4.975800 | 1.482300  | -1.266500 |
| C    | -3.449900 | 2.894000  | -0.626700 |
| C    | -4.104900 | 5.132500  | -0.460000 |
| H    | -3.224300 | 5.486600  | -0.993800 |
| H    | -3.913500 | 5.173600  | 0.611400  |
| H    | -4.976000 | 5.726300  | -0.717500 |
| C    | -3.862700 | -0.852300 | -1.445700 |
| C    | -5.754300 | -2.191700 | -1.178900 |
| H    | -5.878700 | -2.318100 | -2.253100 |
| H    | -6.717000 | -2.109500 | -0.684700 |
| H    | -5.186100 | -3.028700 | -0.773400 |
| C    | 3.022600  | 1.191100  | -1.197400 |
| H    | 3.851800  | 1.683300  | -1.717400 |
| C    | 4.531100  | 0.114400  | 0.207600  |
| C    | 5.367200  | -0.686800 | -0.582900 |
| C    | 6.645600  | -0.968400 | -0.103700 |
| H    | 7.310300  | -1.579300 | -0.703200 |
| C    | 7.076600  | -0.492900 | 1.120900  |
| H    | 8.073500  | -0.724200 | 1.473700  |
| C    | 6.219900  | 0.268500  | 1.905300  |
| H    | 6.558100  | 0.621400  | 2.871000  |
| C    | 4.938600  | 0.577900  | 1.471500  |
| C    | 4.921900  | -1.276800 | -1.908300 |
| H    | 3.855400  | -1.085700 | -2.028500 |
| C    | 5.657800  | -0.621900 | -3.079500 |
| H    | 5.496400  | 0.457000  | -3.099000 |
| H    | 5.315700  | -1.038500 | -4.028700 |
| H    | 6.733500  | -0.795200 | -3.000900 |
| C    | 5.110700  | -2.795000 | -1.939800 |
| H    | 6.166800  | -3.067200 | -1.893200 |
| H    | 4.704200  | -3.203400 | -2.866700 |
| H    | 4.600800  | -3.270900 | -1.101400 |
| C    | 3.996400  | 1.434500  | 2.292100  |
| H    | 2.983800  | 1.072200  | 2.093500  |
| C    | 4.065900  | 2.894500  | 1.831300  |
| H    | 3.361900  | 3.508300  | 2.396400  |
| H    | 3.827400  | 2.991400  | 0.771800  |
| H    | 5.071700  | 3.290200  | 1.991100  |
| C    | 4.245100  | 1.347200  | 3.794700  |
| H    | 5.183800  | 1.830300  | 4.074000  |
| H    | 4.278100  | 0.311800  | 4.136600  |
| H    | 3.444700  | 1.859700  | 4.330100  |
| As   | 0.633400  | -0.437300 | 0.347900  |
| 90   |           |           |           |
| 4-Sb |           |           |           |
| Sb   | 1.039500  | -0.443100 | 0.326500  |

|   |           |           |           |
|---|-----------|-----------|-----------|
| O | -5.168500 | -0.815900 | -0.872900 |
| N | -1.319700 | -0.475200 | 0.104900  |
| C | 0.567600  | 0.755700  | -1.278000 |
| O | -3.495300 | -1.556000 | -2.168100 |
| N | 3.062000  | 0.368400  | -0.507400 |
| C | -0.769800 | 0.974500  | -1.651900 |
| O | -4.259200 | 3.914100  | -0.647600 |
| C | -1.060500 | 1.769100  | -2.758100 |
| H | -2.090600 | 1.927100  | -3.056300 |
| C | -0.036400 | 2.362200  | -3.489200 |
| H | -0.274600 | 2.974700  | -4.348000 |
| O | -2.220100 | 3.162200  | -0.114600 |
| C | 1.289500  | 2.171900  | -3.115900 |
| H | 2.087200  | 2.643400  | -3.679700 |
| C | 1.595400  | 1.373800  | -2.017000 |
| C | -1.759000 | 0.317800  | -0.823400 |
| C | -2.903000 | -0.490300 | 1.974700  |
| C | -2.230600 | -1.178200 | 0.951600  |
| C | -3.808200 | -1.199600 | 2.758100  |
| H | -4.336000 | -0.685700 | 3.552100  |
| C | -4.038600 | -2.547700 | 2.545900  |
| H | -4.752200 | -3.081200 | 3.160800  |
| C | -3.335900 | -3.217700 | 1.557400  |
| H | -3.500800 | -4.278400 | 1.414600  |
| C | -2.414700 | -2.558200 | 0.749100  |
| C | -2.606800 | 0.960300  | 2.296500  |
| H | -2.074000 | 1.406400  | 1.459600  |
| C | -3.871200 | 1.786500  | 2.535600  |
| H | -3.615000 | 2.847000  | 2.579200  |
| H | -4.349000 | 1.525500  | 3.481900  |
| H | -4.606500 | 1.639500  | 1.741300  |
| C | -1.677700 | 1.037200  | 3.512400  |
| H | -0.742700 | 0.508400  | 3.319500  |
| H | -2.153600 | 0.589200  | 4.387900  |
| H | -1.441000 | 2.077700  | 3.742800  |
| C | -1.602800 | -3.341700 | -0.264800 |
| H | -1.175200 | -2.634500 | -0.977200 |
| C | -2.430800 | -4.355500 | -1.054700 |
| H | -3.278000 | -3.880100 | -1.546000 |
| H | -2.796100 | -5.160900 | -0.414500 |
| H | -1.806400 | -4.812700 | -1.824000 |
| C | -0.455000 | -4.064200 | 0.450600  |
| H | 0.182600  | -4.573300 | -0.274900 |
| H | -0.854400 | -4.811100 | 1.141500  |
| H | 0.165100  | -3.372900 | 1.020900  |
| C | -3.222500 | 0.507300  | -1.024300 |
| C | -3.905100 | 1.646200  | -0.917800 |
| H | -4.972900 | 1.641100  | -1.094100 |
| C | -3.332900 | 2.958900  | -0.519200 |
| C | -3.843000 | 5.224700  | -0.259400 |

|   |           |           |           |
|---|-----------|-----------|-----------|
| H | -2.980000 | 5.534000  | -0.846600 |
| H | -3.578600 | 5.234700  | 0.797300  |
| H | -4.691500 | 5.874000  | -0.449300 |
| C | -3.961200 | -0.738900 | -1.420600 |
| C | -5.901100 | -2.009000 | -1.167400 |
| H | -6.025000 | -2.121900 | -2.243100 |
| H | -6.862100 | -1.893300 | -0.676800 |
| H | -5.367200 | -2.869800 | -0.765300 |
| C | 2.931300  | 1.125200  | -1.543200 |
| H | 3.800100  | 1.562100  | -2.035800 |
| C | 4.341100  | 0.104000  | 0.056900  |
| C | 5.001200  | -1.087400 | -0.270400 |
| C | 6.229700  | -1.339500 | 0.333900  |
| H | 6.759000  | -2.254600 | 0.096100  |
| C | 6.784200  | -0.443800 | 1.232900  |
| H | 7.741900  | -0.656100 | 1.690700  |
| C | 6.106700  | 0.722400  | 1.550500  |
| H | 6.543000  | 1.416700  | 2.258200  |
| C | 4.872700  | 1.016500  | 0.980300  |
| C | 4.412900  | -2.094400 | -1.239500 |
| H | 3.488400  | -1.679900 | -1.643000 |
| C | 5.357800  | -2.362500 | -2.412000 |
| H | 5.609000  | -1.438900 | -2.935600 |
| H | 4.891700  | -3.045900 | -3.123800 |
| H | 6.288800  | -2.820300 | -2.071500 |
| C | 4.055800  | -3.396100 | -0.518700 |
| H | 4.946500  | -3.860200 | -0.089100 |
| H | 3.607200  | -4.104900 | -1.217300 |
| H | 3.343300  | -3.213100 | 0.287400  |
| C | 4.151500  | 2.300300  | 1.343500  |
| H | 3.125900  | 2.228800  | 0.978700  |
| C | 4.815700  | 3.498600  | 0.660200  |
| H | 4.281200  | 4.419800  | 0.897900  |
| H | 4.829200  | 3.378800  | -0.424400 |
| H | 5.849100  | 3.605800  | 0.998500  |
| C | 4.078800  | 2.512800  | 2.855600  |
| H | 5.068000  | 2.673400  | 3.288000  |
| H | 3.625400  | 1.652900  | 3.350200  |
| H | 3.474800  | 3.393700  | 3.078800  |

106

5-As

|    |           |           |           |
|----|-----------|-----------|-----------|
| As | 0.986000  | -0.130900 | -0.624600 |
| O  | 1.628600  | -3.219700 | -1.783600 |
| N  | 2.523400  | 0.731200  | -0.028500 |
| C  | 0.368200  | 0.127300  | 1.240900  |
| N  | -1.926700 | -0.673300 | -0.174500 |
| O  | 1.568600  | -4.141900 | 0.257900  |
| C  | 1.488100  | 0.265500  | 2.050900  |
| O  | 4.335400  | -3.224900 | 0.960100  |
| C  | 1.355800  | 0.492000  | 3.406900  |

|   |           |           |           |
|---|-----------|-----------|-----------|
| H | 2.229000  | 0.575000  | 4.042300  |
| O | 4.073600  | -2.035400 | 2.842000  |
| C | 0.071800  | 0.607200  | 3.942400  |
| H | -0.052200 | 0.792400  | 5.001400  |
| O | -3.416000 | 4.121500  | 1.510400  |
| C | -1.046800 | 0.477400  | 3.136200  |
| H | -2.036400 | 0.556700  | 3.569600  |
| C | -0.905600 | 0.219100  | 1.768800  |
| O | -1.678300 | 2.887700  | 0.823400  |
| C | 2.778300  | 0.087300  | 1.247200  |
| H | 3.666100  | 0.459700  | 1.753500  |
| O | -5.654300 | -0.150500 | 1.026700  |
| C | 3.330900  | 1.757800  | -0.565500 |
| O | -4.234300 | -1.521100 | 2.089600  |
| C | 2.816400  | 3.064100  | -0.685000 |
| C | 3.644700  | 4.063800  | -1.186000 |
| H | 3.259000  | 5.070200  | -1.291000 |
| C | 4.959700  | 3.801400  | -1.533200 |
| H | 5.594400  | 4.597500  | -1.901300 |
| C | 4.652900  | 1.473200  | -0.959900 |
| C | 5.455600  | 2.514100  | -1.415900 |
| H | 6.480600  | 2.309100  | -1.701900 |
| C | 1.383500  | 3.390800  | -0.316400 |
| H | 1.016100  | 2.609600  | 0.350200  |
| C | 1.243900  | 4.713800  | 0.434900  |
| H | 1.454500  | 5.570900  | -0.207800 |
| H | 1.916500  | 4.757100  | 1.292800  |
| H | 0.218500  | 4.808000  | 0.793600  |
| C | 0.501900  | 3.401900  | -1.569000 |
| H | 0.827900  | 4.190800  | -2.252600 |
| H | -0.540300 | 3.580600  | -1.294600 |
| H | 0.556500  | 2.453300  | -2.106600 |
| C | 5.211300  | 0.064200  | -0.924400 |
| H | 4.376800  | -0.616100 | -0.764200 |
| C | 2.834300  | -1.420000 | 0.930200  |
| C | 1.942900  | -1.797300 | 0.021300  |
| C | 1.701600  | -3.178900 | -0.448500 |
| C | 1.423400  | -4.515400 | -2.349100 |
| H | 1.373700  | -4.364800 | -3.422900 |
| H | 0.494700  | -4.944400 | -1.977200 |
| H | 2.253200  | -5.171600 | -2.090200 |
| C | 3.793400  | -2.255500 | 1.691200  |
| C | 5.238300  | -4.087000 | 1.655300  |
| H | 5.594100  | -4.799100 | 0.917800  |
| H | 4.717900  | -4.598300 | 2.463400  |
| H | 6.066300  | -3.510500 | 2.065900  |
| C | -2.073000 | 0.010900  | 0.885700  |
| C | -3.031900 | -0.901900 | -1.033500 |
| C | -3.505500 | 0.104300  | -1.883800 |
| C | -4.604500 | -0.188400 | -2.691000 |

|      |           |           |           |
|------|-----------|-----------|-----------|
| H    | -4.986900 | 0.574800  | -3.358400 |
| C    | -5.212200 | -1.429300 | -2.655100 |
| H    | -6.073000 | -1.632100 | -3.279600 |
| C    | -4.702900 | -2.424800 | -1.830200 |
| H    | -5.173000 | -3.399500 | -1.820900 |
| C    | -3.598900 | -2.190500 | -1.022400 |
| C    | -2.816500 | 1.449200  | -2.009900 |
| H    | -2.095700 | 1.555800  | -1.198800 |
| C    | -2.032900 | 1.506200  | -3.325300 |
| H    | -1.258500 | 0.737100  | -3.351200 |
| H    | -1.555200 | 2.480600  | -3.442800 |
| H    | -2.700700 | 1.347700  | -4.175100 |
| C    | -3.793100 | 2.623200  | -1.922500 |
| H    | -4.416400 | 2.688100  | -2.816700 |
| H    | -3.239200 | 3.561600  | -1.838700 |
| H    | -4.457700 | 2.533800  | -1.060900 |
| C    | -2.965600 | -3.279900 | -0.180900 |
| H    | -2.645200 | -2.829500 | 0.759400  |
| C    | -1.719100 | -3.809200 | -0.898300 |
| H    | -2.004000 | -4.304000 | -1.830600 |
| H    | -1.189200 | -4.526900 | -0.269000 |
| H    | -1.033900 | -2.994000 | -1.141100 |
| C    | -3.913200 | -4.423300 | 0.160800  |
| H    | -4.189300 | -4.998600 | -0.725500 |
| H    | -4.824500 | -4.053900 | 0.634500  |
| H    | -3.425400 | -5.107900 | 0.855600  |
| C    | -3.419200 | 0.555300  | 1.272100  |
| C    | -3.747700 | 1.835000  | 1.422500  |
| H    | -4.765400 | 2.101900  | 1.677300  |
| C    | -2.812600 | 2.968700  | 1.217400  |
| C    | -2.626100 | 5.296500  | 1.322700  |
| H    | -1.776500 | 5.287900  | 2.004100  |
| H    | -3.281500 | 6.133600  | 1.539600  |
| H    | -2.263700 | 5.344800  | 0.296100  |
| C    | -4.466700 | -0.495000 | 1.508600  |
| C    | -6.681000 | -1.137000 | 1.170600  |
| H    | -7.569600 | -0.704500 | 0.722600  |
| H    | -6.845200 | -1.360600 | 2.223200  |
| H    | -6.387200 | -2.044000 | 0.642600  |
| C    | 6.216700  | -0.123900 | 0.215100  |
| H    | 6.586800  | -1.151400 | 0.230300  |
| H    | 5.778700  | 0.093400  | 1.190800  |
| H    | 7.072200  | 0.542600  | 0.081200  |
| C    | 5.848000  | -0.329900 | -2.259200 |
| H    | 6.750300  | 0.249600  | -2.462700 |
| H    | 5.152500  | -0.176200 | -3.085100 |
| H    | 6.129900  | -1.384100 | -2.238900 |
| 106  |           |           |           |
| 5-Sb |           |           |           |
| Sb   | -0.837100 | -0.191500 | -0.831800 |

|   |           |           |           |
|---|-----------|-----------|-----------|
| O | 3.473600  | 4.155800  | 1.576000  |
| N | 2.012100  | -0.620900 | -0.141400 |
| C | -0.276300 | 0.177400  | 1.211900  |
| O | 1.787900  | 2.920900  | 0.772000  |
| N | -2.527700 | 0.735600  | -0.128800 |
| C | 0.976200  | 0.291300  | 1.782700  |
| O | 5.734900  | -0.130100 | 1.108700  |
| C | 1.079300  | 0.576600  | 3.146200  |
| H | 2.053100  | 0.673100  | 3.611400  |
| O | 4.286800  | -1.491900 | 2.144800  |
| C | -0.070800 | 0.708600  | 3.909700  |
| H | 0.012900  | 0.915000  | 4.968900  |
| O | -1.677400 | -3.496900 | -1.640100 |
| C | -1.333600 | 0.565700  | 3.333600  |
| H | -2.227300 | 0.646600  | 3.940900  |
| C | -1.426300 | 0.313100  | 1.975200  |
| O | -1.629900 | -4.230600 | 0.476200  |
| C | 2.156600  | 0.063200  | 0.921100  |
| O | -4.365900 | -3.158000 | 1.064300  |
| C | 3.114800  | -0.891400 | -0.991700 |
| O | -4.011700 | -1.901600 | 2.885900  |
| C | 3.638200  | -2.198200 | -0.962800 |
| C | 4.732200  | -2.479400 | -1.769400 |
| H | 5.170900  | -3.468400 | -1.748600 |
| C | 5.271300  | -1.512400 | -2.609500 |
| H | 6.123600  | -1.752100 | -3.232600 |
| C | 4.705700  | -0.252300 | -2.661600 |
| H | 5.112100  | 0.488600  | -3.340000 |
| C | 3.618900  | 0.087500  | -1.856200 |
| C | 2.972600  | -3.254000 | -0.102400 |
| H | 2.666300  | -2.777000 | 0.829200  |
| C | 1.710200  | -3.766700 | -0.805500 |
| H | 1.048000  | -2.941400 | -1.076600 |
| H | 1.159200  | -4.446900 | -0.152900 |
| H | 1.977100  | -4.299200 | -1.722000 |
| C | 3.889000  | -4.415200 | 0.263500  |
| H | 3.381100  | -5.073400 | 0.969200  |
| H | 4.807600  | -4.059700 | 0.733800  |
| H | 4.153400  | -5.014100 | -0.610600 |
| C | 2.976700  | 1.453900  | -1.993700 |
| H | 2.251100  | 1.584600  | -1.190500 |
| C | 2.210700  | 1.541900  | -3.317600 |
| H | 2.889000  | 1.405000  | -4.162800 |
| H | 1.732700  | 2.518600  | -3.416300 |
| H | 1.437500  | 0.773700  | -3.375400 |
| C | 3.991700  | 2.593600  | -1.892500 |
| H | 4.637000  | 2.627800  | -2.772500 |
| H | 4.632700  | 2.486300  | -1.015300 |
| H | 3.470800  | 3.551900  | -1.828300 |
| C | 3.502700  | 0.592600  | 1.319000  |

|   |           |           |           |
|---|-----------|-----------|-----------|
| C | 3.832100  | 1.873100  | 1.460700  |
| H | 4.845400  | 2.142000  | 1.730200  |
| C | 2.898300  | 3.004400  | 1.228800  |
| C | 2.678800  | 5.326400  | 1.377500  |
| H | 2.354900  | 5.388200  | 0.338900  |
| H | 3.316300  | 6.166200  | 1.633600  |
| H | 1.804200  | 5.297100  | 2.025700  |
| C | 4.537500  | -0.465500 | 1.572200  |
| C | 6.749400  | -1.128200 | 1.262200  |
| H | 6.895300  | -1.359400 | 2.315900  |
| H | 7.649100  | -0.702400 | 0.830200  |
| H | 6.453600  | -2.029000 | 0.724800  |
| C | -2.715500 | 0.103300  | 1.168400  |
| H | -3.591900 | 0.476700  | 1.695400  |
| C | -3.360000 | 1.791600  | -0.551600 |
| C | -2.852600 | 3.104800  | -0.641500 |
| C | -3.704800 | 4.126300  | -1.049900 |
| H | -3.323900 | 5.137000  | -1.129200 |
| C | -5.038100 | 3.880500  | -1.335100 |
| H | -5.689200 | 4.692800  | -1.632800 |
| C | -5.530900 | 2.589800  | -1.243300 |
| H | -6.571400 | 2.398300  | -1.478500 |
| C | -4.707300 | 1.530000  | -0.876700 |
| C | -1.402400 | 3.413500  | -0.324100 |
| H | -1.022100 | 2.614500  | 0.313600  |
| C | -0.557500 | 3.449600  | -1.602100 |
| H | -0.655100 | 2.531300  | -2.185900 |
| H | 0.497500  | 3.585600  | -1.351500 |
| H | -0.876500 | 4.276500  | -2.242500 |
| C | -1.218600 | 4.716400  | 0.452600  |
| H | -1.453400 | 5.591200  | -0.157100 |
| H | -0.176600 | 4.795600  | 0.765100  |
| H | -1.850400 | 4.740300  | 1.341700  |
| C | -5.266100 | 0.120100  | -0.863100 |
| H | -4.421500 | -0.564200 | -0.785400 |
| C | -6.194300 | -0.120200 | 0.331100  |
| H | -7.060600 | 0.543900  | 0.280400  |
| H | -5.696400 | 0.060000  | 1.285000  |
| H | -6.557500 | -1.150500 | 0.327800  |
| C | -5.996600 | -0.216000 | -2.165600 |
| H | -6.913100 | 0.367200  | -2.272000 |
| H | -6.274100 | -1.271700 | -2.175100 |
| H | -5.366300 | -0.017600 | -3.033300 |
| C | -2.793900 | -1.416500 | 0.916700  |
| C | -1.936000 | -1.904100 | 0.026900  |
| C | -1.750600 | -3.329400 | -0.311200 |
| C | -1.477200 | -4.839300 | -2.081500 |
| H | -1.427700 | -4.790900 | -3.164900 |
| H | -2.307400 | -5.468500 | -1.763500 |
| H | -0.548500 | -5.234700 | -1.672600 |

|   |           |           |          |
|---|-----------|-----------|----------|
| C | -3.767500 | -2.179900 | 1.739300 |
| C | -5.280900 | -3.954500 | 1.818700 |
| H | -6.071600 | -3.329100 | 2.231000 |
| H | -4.756800 | -4.456600 | 2.630300 |
| H | -5.687700 | -4.678700 | 1.120200 |

76

6-As

|   |           |           |           |
|---|-----------|-----------|-----------|
| C | -1.253300 | 1.477400  | 3.753600  |
| H | -2.179300 | 1.736000  | 4.253300  |
| C | -1.289300 | 0.955300  | 2.439400  |
| C | -2.450200 | 0.733900  | 1.680300  |
| H | -3.462800 | 0.936900  | 2.009000  |
| N | -2.231200 | 0.248000  | 0.469900  |
| C | -0.089400 | 0.609900  | 1.755100  |
| C | -0.047500 | 1.655100  | 4.367900  |
| H | 0.003400  | 2.062600  | 5.369000  |
| C | 1.149000  | 1.302900  | 3.699800  |
| H | 2.096300  | 1.444200  | 4.208600  |
| C | 1.146000  | 0.774800  | 2.433700  |
| C | 2.437200  | 0.317100  | 1.802800  |
| H | 2.626000  | -0.722800 | 2.082500  |
| N | 2.369200  | 0.379500  | 0.344600  |
| C | 3.465900  | -0.210900 | -0.347400 |
| C | 3.536300  | -1.608200 | -0.442400 |
| C | 4.453300  | 0.601800  | -0.936200 |
| C | 4.615100  | -2.175000 | -1.115900 |
| C | 5.500700  | -0.008200 | -1.617100 |
| C | 5.591000  | -1.389200 | -1.701700 |
| H | 4.680400  | -3.254000 | -1.194300 |
| H | 6.268400  | 0.599900  | -2.076700 |
| H | 6.419500  | -1.848900 | -2.225200 |
| C | -3.302900 | 0.007100  | -0.447600 |
| C | -3.762300 | 1.067400  | -1.237900 |
| C | -3.836600 | -1.283500 | -0.541800 |
| C | -4.789000 | 0.805600  | -2.140200 |
| C | -4.857400 | -1.495500 | -1.464200 |
| C | -5.332100 | -0.463200 | -2.256300 |
| H | -5.163500 | 1.607900  | -2.764500 |
| H | -5.284300 | -2.486100 | -1.564700 |
| H | -6.126400 | -0.648400 | -2.968200 |
| C | 4.345000  | 2.114500  | -0.865800 |
| H | 3.955500  | 2.374700  | 0.123700  |
| C | 3.361100  | 2.629500  | -1.925200 |
| H | 2.381000  | 2.152800  | -1.854600 |
| H | 3.224800  | 3.708600  | -1.834500 |
| H | 3.754300  | 2.416200  | -2.921500 |
| C | 5.682200  | 2.835700  | -1.011300 |
| H | 6.425400  | 2.444900  | -0.315300 |
| H | 6.078600  | 2.742800  | -2.023900 |
| H | 5.549300  | 3.899700  | -0.811200 |



|      |           |           |           |
|------|-----------|-----------|-----------|
| C    | 2.457500  | -2.517500 | 0.115600  |
| H    | 1.711800  | -1.905100 | 0.619500  |
| C    | 3.021400  | -3.511300 | 1.132700  |
| H    | 2.217100  | -4.111800 | 1.561100  |
| H    | 3.733500  | -4.193200 | 0.663300  |
| H    | 3.538400  | -2.999600 | 1.946800  |
| C    | 1.730800  | -3.250100 | -1.014400 |
| H    | 0.924500  | -3.864300 | -0.608400 |
| H    | 1.296900  | -2.539700 | -1.719900 |
| H    | 2.413200  | -3.903100 | -1.562600 |
| C    | -3.324900 | -2.433900 | 0.302100  |
| H    | -2.633000 | -2.032100 | 1.043200  |
| C    | -2.550600 | -3.427600 | -0.566700 |
| H    | -1.716000 | -2.936400 | -1.069500 |
| H    | -2.154600 | -4.239800 | 0.045900  |
| H    | -3.202900 | -3.861300 | -1.328100 |
| C    | -4.458100 | -3.134200 | 1.053500  |
| H    | -5.027700 | -2.427200 | 1.658300  |
| H    | -5.149600 | -3.623900 | 0.365100  |
| H    | -4.050800 | -3.900800 | 1.714300  |
| C    | -3.178500 | 2.463400  | -1.143100 |
| H    | -2.389500 | 2.455400  | -0.390100 |
| C    | -2.542300 | 2.882500  | -2.469900 |
| H    | -2.086700 | 3.869500  | -2.373300 |
| H    | -1.769500 | 2.174400  | -2.772400 |
| H    | -3.289000 | 2.933200  | -3.265200 |
| C    | -4.238200 | 3.474400  | -0.701300 |
| H    | -5.038500 | 3.553100  | -1.440000 |
| H    | -4.686100 | 3.185200  | 0.250700  |
| H    | -3.791500 | 4.463200  | -0.584600 |
| As   | -0.415500 | -0.021200 | 0.007600  |
| H    | 3.276000  | 0.903000  | 2.200600  |
| H    | 2.236100  | 1.340600  | 0.060800  |
| 76   |           |           |           |
| 6-Sb |           |           |           |
| C    | 1.217300  | -0.952100 | 3.857200  |
| H    | 2.156100  | -1.148100 | 4.362400  |
| C    | 1.220400  | -0.618000 | 2.486200  |
| C    | 2.406400  | -0.514800 | 1.711300  |
| H    | 3.394600  | -0.694100 | 2.127800  |
| N    | 2.276900  | -0.192200 | 0.449800  |
| C    | 0.008800  | -0.358900 | 1.799300  |
| C    | 0.027200  | -1.028500 | 4.530900  |
| H    | 0.007600  | -1.291500 | 5.580300  |
| C    | -1.181200 | -0.759000 | 3.857300  |
| H    | -2.116100 | -0.814500 | 4.404800  |
| C    | -1.199600 | -0.415800 | 2.524700  |
| C    | -2.498100 | -0.039800 | 1.852800  |
| H    | -2.688500 | 1.026300  | 1.999400  |
| N    | -2.434100 | -0.290500 | 0.408100  |

|   |           |           |           |
|---|-----------|-----------|-----------|
| C | -3.574800 | 0.145000  | -0.337600 |
| C | -3.733100 | 1.509200  | -0.615300 |
| C | -4.512900 | -0.800100 | -0.795700 |
| C | -4.850000 | 1.911900  | -1.344000 |
| C | -5.601100 | -0.352500 | -1.535200 |
| C | -5.777800 | 0.996200  | -1.804200 |
| H | -4.984200 | 2.964100  | -1.565400 |
| H | -6.330700 | -1.063100 | -1.899400 |
| H | -6.636100 | 1.327500  | -2.374400 |
| C | 3.421100  | -0.079000 | -0.397600 |
| C | 3.891200  | -1.219700 | -1.061900 |
| C | 4.014100  | 1.178800  | -0.569400 |
| C | 4.979900  | -1.072000 | -1.916200 |
| C | 5.100600  | 1.273400  | -1.434100 |
| C | 5.582000  | 0.161100  | -2.104100 |
| H | 5.360300  | -1.938500 | -2.444000 |
| H | 5.575500  | 2.235800  | -1.584500 |
| H | 6.426700  | 0.254800  | -2.774600 |
| C | -4.308500 | -2.281600 | -0.531400 |
| H | -3.903700 | -2.390500 | 0.480200  |
| C | -3.295300 | -2.863400 | -1.527100 |
| H | -2.345200 | -2.324000 | -1.525700 |
| H | -3.092800 | -3.912500 | -1.304900 |
| H | -3.702700 | -2.798300 | -2.538200 |
| C | -5.597100 | -3.098900 | -0.571200 |
| H | -6.364900 | -2.669300 | 0.073400  |
| H | -5.996400 | -3.164900 | -1.584600 |
| H | -5.395500 | -4.116600 | -0.234800 |
| C | -2.720200 | 2.555600  | -0.190700 |
| H | -1.913300 | 2.061300  | 0.348000  |
| C | -3.342300 | 3.596300  | 0.742300  |
| H | -2.583000 | 4.301600  | 1.083900  |
| H | -4.121300 | 4.164100  | 0.229600  |
| H | -3.795600 | 3.128100  | 1.617900  |
| C | -2.085800 | 3.228600  | -1.409300 |
| H | -1.316600 | 3.934700  | -1.090400 |
| H | -1.619700 | 2.490100  | -2.063300 |
| H | -2.831500 | 3.776300  | -1.989100 |
| C | 3.512900  | 2.416200  | 0.149300  |
| H | 2.680900  | 2.126000  | 0.791400  |
| C | 2.983900  | 3.450400  | -0.846100 |
| H | 2.178700  | 3.029800  | -1.450900 |
| H | 2.595300  | 4.321400  | -0.315300 |
| H | 3.776000  | 3.789300  | -1.517200 |
| C | 4.602400  | 3.018500  | 1.038500  |
| H | 4.972400  | 2.286900  | 1.758400  |
| H | 5.450500  | 3.364100  | 0.444000  |
| H | 4.208900  | 3.874700  | 1.589000  |
| C | 3.252700  | -2.584200 | -0.886600 |
| H | 2.450700  | -2.496900 | -0.153300 |

|    |           |           |           |
|----|-----------|-----------|-----------|
| C  | 2.626200  | -3.065000 | -2.196900 |
| H  | 2.138900  | -4.030700 | -2.050800 |
| H  | 1.879600  | -2.354300 | -2.554500 |
| H  | 3.385700  | -3.184100 | -2.972600 |
| C  | 4.261800  | -3.604900 | -0.356500 |
| H  | 5.070200  | -3.767200 | -1.072000 |
| H  | 4.704700  | -3.269400 | 0.582500  |
| H  | 3.772100  | -4.564400 | -0.182800 |
| H  | -3.335300 | -0.576400 | 2.315300  |
| H  | -2.291700 | -1.283100 | 0.270700  |
| Sb | 0.260600  | 0.085900  | -0.226200 |

92

7-As

|   |           |           |           |
|---|-----------|-----------|-----------|
| H | -2.597100 | 0.105900  | 0.793500  |
| O | 0.953900  | 4.012500  | 0.820400  |
| N | -2.593600 | -0.708600 | 0.190300  |
| C | 0.053900  | -0.841300 | 1.330000  |
| N | 2.244900  | -0.395400 | 0.073800  |
| O | 2.341300  | 3.132400  | 2.342900  |
| C | -1.049400 | -1.460600 | 1.881100  |
| O | -1.619600 | 2.554700  | -0.330500 |
| C | -1.104100 | -1.571000 | 3.273900  |
| H | -1.955000 | -2.056800 | 3.737600  |
| C | -0.088600 | -1.053100 | 4.065100  |
| H | -0.148400 | -1.151700 | 5.141500  |
| O | -0.146400 | 2.858900  | -1.991300 |
| C | 0.995000  | -0.382100 | 3.494100  |
| H | 1.765300  | 0.055100  | 4.118000  |
| C | 1.056600  | -0.286400 | 2.118000  |
| C | -2.182800 | -1.879300 | 0.985600  |
| H | -1.867500 | -2.668100 | 0.294300  |
| H | -3.008700 | -2.285000 | 1.582200  |
| C | -3.893800 | -1.335900 | -1.770800 |
| C | -3.866300 | -0.865300 | -0.450400 |
| C | -5.128700 | -1.522100 | -2.384000 |
| H | -5.174200 | -1.892000 | -3.399600 |
| C | -6.307000 | -1.228900 | -1.715300 |
| H | -7.260200 | -1.375200 | -2.207700 |
| C | -6.266300 | -0.747800 | -0.417400 |
| H | -7.193600 | -0.523300 | 0.093000  |
| C | -5.052200 | -0.569800 | 0.241000  |
| C | -2.596700 | -1.538700 | -2.528600 |
| H | -1.859500 | -1.942400 | -1.832500 |
| C | -2.705900 | -2.506600 | -3.702300 |
| H | -3.321000 | -2.095800 | -4.505300 |
| H | -3.135600 | -3.462400 | -3.398000 |
| H | -1.714300 | -2.692700 | -4.117000 |
| C | -2.083500 | -0.176100 | -3.005300 |
| H | -2.784700 | 0.257500  | -3.722700 |
| H | -1.108900 | -0.269700 | -3.488400 |

|   |           |           |           |
|---|-----------|-----------|-----------|
| H | -1.988500 | 0.511200  | -2.162800 |
| C | -6.249700 | -0.344100 | 2.479600  |
| H | -7.120200 | 0.210000  | 2.124200  |
| H | -6.086500 | -0.059100 | 3.519800  |
| H | -6.486400 | -1.408400 | 2.447600  |
| C | -5.005300 | -0.022000 | 1.656100  |
| H | -4.155300 | -0.482100 | 2.167900  |
| C | -4.770700 | 1.493100  | 1.631600  |
| H | -5.598900 | 1.988200  | 1.119300  |
| H | -3.850000 | 1.754400  | 1.106600  |
| H | -4.706000 | 1.890900  | 2.645900  |
| C | 2.082400  | 0.445200  | 1.251800  |
| H | 3.018200  | 0.683000  | 1.754000  |
| C | 3.479000  | -0.853700 | -0.446800 |
| C | 4.101600  | -0.166900 | -1.507000 |
| C | 5.307000  | -0.655600 | -2.000800 |
| H | 5.799000  | -0.146300 | -2.819400 |
| C | 5.896000  | -1.785200 | -1.454000 |
| H | 6.838400  | -2.147200 | -1.845800 |
| C | 5.276800  | -2.454300 | -0.412600 |
| H | 5.741900  | -3.340400 | 0.000800  |
| C | 4.058600  | -2.013600 | 0.097900  |
| C | 3.502600  | 1.115300  | -2.047100 |
| H | 2.417800  | 1.047200  | -1.954000 |
| C | 3.961300  | 2.299700  | -1.189300 |
| H | 5.029200  | 2.477000  | -1.338900 |
| H | 3.807300  | 2.109100  | -0.126200 |
| H | 3.416000  | 3.205600  | -1.462700 |
| C | 3.811600  | 1.377600  | -3.518200 |
| H | 3.550500  | 0.519700  | -4.139600 |
| H | 4.867200  | 1.606000  | -3.676500 |
| H | 3.235900  | 2.237900  | -3.862200 |
| C | 3.395200  | -2.759700 | 1.237200  |
| H | 2.336000  | -2.498600 | 1.226200  |
| C | 3.973400  | -2.307200 | 2.581300  |
| H | 3.465400  | -2.811200 | 3.406000  |
| H | 3.864500  | -1.231400 | 2.722700  |
| H | 5.038400  | -2.546600 | 2.633100  |
| C | 3.503000  | -4.278300 | 1.102600  |
| H | 3.163900  | -4.616600 | 0.122600  |
| H | 2.888100  | -4.760100 | 1.864400  |
| H | 4.527800  | -4.625300 | 1.246200  |
| C | 0.436200  | 1.443400  | -0.190500 |
| C | 1.336900  | 1.700400  | 0.748800  |
| C | 1.607500  | 3.003300  | 1.395800  |
| C | 1.179600  | 5.302500  | 1.390700  |
| H | 2.237100  | 5.556400  | 1.336100  |
| H | 0.859700  | 5.314600  | 2.431400  |
| H | 0.588700  | 5.994000  | 0.798700  |
| C | -0.438800 | 2.376300  | -0.930000 |

|    |           |           |           |
|----|-----------|-----------|-----------|
| C  | -2.538400 | 3.388800  | -1.044600 |
| H  | -2.757700 | 2.953100  | -2.018700 |
| H  | -2.113600 | 4.382100  | -1.179900 |
| H  | -3.435700 | 3.433600  | -0.435600 |
| As | 0.517000  | -0.545000 | -0.569800 |

92

7-Sb

|   |           |           |           |
|---|-----------|-----------|-----------|
| H | -2.527500 | 0.066200  | 0.747300  |
| O | 0.867200  | 3.970400  | 0.859000  |
| N | -2.626600 | -0.770000 | 0.181100  |
| C | -0.007200 | -0.958800 | 1.297700  |
| N | 2.290000  | -0.423500 | 0.025800  |
| O | 2.150300  | 3.010800  | 2.422100  |
| C | -1.113600 | -1.534800 | 1.892100  |
| O | -1.681500 | 2.578500  | -0.374700 |
| C | -1.167500 | -1.577900 | 3.286800  |
| H | -2.022000 | -2.029200 | 3.778400  |
| C | -0.142600 | -1.026100 | 4.044400  |
| H | -0.195300 | -1.068900 | 5.124900  |
| O | -0.193200 | 2.984300  | -2.000100 |
| C | 0.931900  | -0.380000 | 3.432600  |
| H | 1.697800  | 0.101700  | 4.028900  |
| C | 0.992600  | -0.351800 | 2.049900  |
| C | -2.268700 | -1.938500 | 1.015100  |
| H | -1.996500 | -2.763700 | 0.347900  |
| H | -3.113100 | -2.279900 | 1.623800  |
| C | -4.109800 | -1.296000 | -1.682600 |
| C | -3.951700 | -0.835600 | -0.368600 |
| C | -5.395100 | -1.379200 | -2.208300 |
| H | -5.540300 | -1.737600 | -3.218800 |
| C | -6.496400 | -1.001800 | -1.456600 |
| H | -7.490300 | -1.071100 | -1.880400 |
| C | -6.326700 | -0.537700 | -0.162600 |
| H | -7.195600 | -0.246700 | 0.412900  |
| C | -5.058900 | -0.455400 | 0.407100  |
| C | -2.892000 | -1.600700 | -2.531000 |
| H | -2.132600 | -2.034900 | -1.877600 |
| C | -3.151600 | -2.593500 | -3.659600 |
| H | -3.802000 | -2.169400 | -4.426900 |
| H | -3.613900 | -3.509800 | -3.289300 |
| H | -2.209400 | -2.855600 | -4.142700 |
| C | -2.337000 | -0.287600 | -3.093600 |
| H | -3.066400 | 0.164900  | -3.769600 |
| H | -1.413100 | -0.457300 | -3.650200 |
| H | -2.136500 | 0.427000  | -2.291500 |
| C | -6.066900 | -0.171100 | 2.729200  |
| H | -6.934600 | 0.424400  | 2.440400  |
| H | -5.811000 | 0.104100  | 3.753100  |
| H | -6.356300 | -1.223000 | 2.717300  |
| C | -4.875200 | 0.092200  | 1.811700  |

|    |           |           |           |
|----|-----------|-----------|-----------|
| H  | -4.010000 | -0.400900 | 2.262100  |
| C  | -4.574900 | 1.594800  | 1.757600  |
| H  | -5.409300 | 2.122700  | 1.289600  |
| H  | -3.674300 | 1.809900  | 1.179100  |
| H  | -4.434200 | 1.995900  | 2.762800  |
| C  | 2.012100  | 0.403400  | 1.192300  |
| H  | 2.911800  | 0.679300  | 1.741100  |
| C  | 3.601800  | -0.759000 | -0.383500 |
| C  | 4.279500  | 0.027700  | -1.336700 |
| C  | 5.561400  | -0.347400 | -1.726500 |
| H  | 6.093800  | 0.244200  | -2.460200 |
| C  | 6.174700  | -1.465600 | -1.184000 |
| H  | 7.175300  | -1.739200 | -1.494700 |
| C  | 5.505500  | -2.233000 | -0.246300 |
| H  | 5.992000  | -3.105700 | 0.171400  |
| C  | 4.215900  | -1.903100 | 0.161200  |
| C  | 3.654000  | 1.299300  | -1.871900 |
| H  | 2.570500  | 1.179600  | -1.845100 |
| C  | 4.002700  | 2.474400  | -0.951400 |
| H  | 5.068500  | 2.703900  | -1.027100 |
| H  | 3.792800  | 2.242700  | 0.094100  |
| H  | 3.433700  | 3.364100  | -1.230800 |
| C  | 4.040200  | 1.626000  | -3.312200 |
| H  | 3.858800  | 0.779700  | -3.976600 |
| H  | 5.091800  | 1.906400  | -3.395800 |
| H  | 3.448300  | 2.471900  | -3.665000 |
| C  | 3.511500  | -2.742700 | 1.206800  |
| H  | 2.443100  | -2.538100 | 1.123700  |
| C  | 3.954600  | -2.320700 | 2.610800  |
| H  | 3.410800  | -2.884200 | 3.371800  |
| H  | 3.774200  | -1.258600 | 2.781700  |
| H  | 5.023700  | -2.505700 | 2.741100  |
| C  | 3.721200  | -4.243800 | 1.012900  |
| H  | 3.476300  | -4.551500 | -0.004800 |
| H  | 3.084300  | -4.799800 | 1.702800  |
| H  | 4.752900  | -4.537500 | 1.215800  |
| C  | 0.370400  | 1.462200  | -0.279000 |
| C  | 1.249000  | 1.656600  | 0.697000  |
| C  | 1.480100  | 2.929500  | 1.423600  |
| C  | 1.052600  | 5.226800  | 1.511800  |
| H  | 2.110700  | 5.482500  | 1.539200  |
| H  | 0.666300  | 5.182700  | 2.528900  |
| H  | 0.499500  | 5.950700  | 0.921800  |
| C  | -0.488100 | 2.441200  | -0.968000 |
| C  | -2.596300 | 3.446300  | -1.050800 |
| H  | -2.812100 | 3.060300  | -2.046300 |
| H  | -2.172000 | 4.445400  | -1.135900 |
| H  | -3.496800 | 3.461100  | -0.444700 |
| Sb | 0.444200  | -0.686900 | -0.788800 |

92

## 8-As

|    |           |           |           |
|----|-----------|-----------|-----------|
| As | 0.474400  | 2.061700  | 0.229000  |
| H  | -4.296400 | 0.051500  | 0.613100  |
| O  | -0.668500 | 4.675700  | -0.552300 |
| N  | -3.441100 | -0.470200 | 0.488100  |
| C  | 0.217600  | 0.223100  | 0.667200  |
| O  | -2.489100 | 4.521900  | 0.735900  |
| H  | 4.031400  | -0.948600 | 1.828000  |
| N  | 3.849900  | -0.898800 | 0.836500  |
| C  | -1.051900 | -0.357700 | 0.895400  |
| O  | -3.674200 | 2.935300  | -1.230600 |
| C  | -1.111800 | -1.642400 | 1.489500  |
| H  | -2.067000 | -2.054700 | 1.775700  |
| C  | 0.025500  | -2.362300 | 1.723800  |
| H  | -0.040800 | -3.341300 | 2.180500  |
| O  | -4.770700 | 1.966500  | 0.453600  |
| C  | 1.277700  | -1.838700 | 1.372000  |
| H  | 2.172200  | -2.431300 | 1.508500  |
| C  | 1.387800  | -0.560600 | 0.881300  |
| C  | -2.299000 | 0.292800  | 0.542000  |
| C  | -3.598400 | -1.794100 | -0.004100 |
| C  | -2.953300 | -2.238300 | -1.166800 |
| C  | -3.151600 | -3.563200 | -1.554400 |
| H  | -2.650600 | -3.928900 | -2.442700 |
| C  | -3.984800 | -4.410600 | -0.849600 |
| H  | -4.125500 | -5.432500 | -1.177300 |
| C  | -4.646400 | -3.940900 | 0.275700  |
| H  | -5.301400 | -4.605100 | 0.823700  |
| C  | -4.460300 | -2.639800 | 0.721000  |
| C  | -2.093400 | -1.357700 | -2.057500 |
| H  | -2.057100 | -0.350300 | -1.648200 |
| C  | -0.655000 | -1.875000 | -2.148300 |
| H  | -0.210400 | -2.004800 | -1.160100 |
| H  | -0.039800 | -1.171600 | -2.712800 |
| H  | -0.622200 | -2.837900 | -2.663100 |
| C  | -2.713300 | -1.235300 | -3.453000 |
| H  | -2.759400 | -2.205000 | -3.951700 |
| H  | -2.112700 | -0.566700 | -4.072200 |
| H  | -3.726900 | -0.836000 | -3.396700 |
| C  | -5.173400 | -2.118600 | 1.953200  |
| H  | -4.497000 | -1.411500 | 2.442000  |
| C  | -6.445700 | -1.358200 | 1.557100  |
| H  | -7.148200 | -2.041800 | 1.075200  |
| H  | -6.250900 | -0.540700 | 0.860600  |
| H  | -6.928200 | -0.935000 | 2.439500  |
| C  | -1.294500 | 2.529600  | 0.191600  |
| C  | -2.392800 | 1.656900  | 0.260000  |
| C  | -3.735400 | 2.199100  | -0.123200 |
| C  | -4.876100 | 3.624700  | -1.578200 |
| H  | -5.679800 | 2.914300  | -1.763500 |

|      |           |           |           |
|------|-----------|-----------|-----------|
| H    | -4.645100 | 4.186800  | -2.477500 |
| H    | -5.159600 | 4.293200  | -0.766100 |
| C    | -1.575100 | 3.996200  | 0.152600  |
| C    | -0.822200 | 6.095000  | -0.546400 |
| H    | -1.784800 | 6.369500  | -0.975600 |
| H    | -0.008600 | 6.482900  | -1.151200 |
| H    | -0.761500 | 6.477200  | 0.471500  |
| C    | 2.751600  | 0.023400  | 0.575200  |
| H    | 2.791600  | 0.307100  | -0.478400 |
| H    | 2.879100  | 0.959500  | 1.136200  |
| C    | 5.040200  | -0.659200 | 0.099300  |
| C    | 6.186200  | -0.138000 | 0.728800  |
| C    | 7.331600  | 0.064300  | -0.032500 |
| H    | 8.220900  | 0.466500  | 0.434200  |
| C    | 7.349000  | -0.216400 | -1.390000 |
| H    | 8.245300  | -0.037900 | -1.970000 |
| C    | 6.215100  | -0.728700 | -1.995900 |
| H    | 6.235900  | -0.961400 | -3.054300 |
| C    | 5.053700  | -0.971800 | -1.269100 |
| C    | 6.176700  | 0.157000  | 2.217700  |
| H    | 5.192300  | 0.565400  | 2.468400  |
| C    | 6.386100  | -1.134400 | 3.019500  |
| H    | 5.666600  | -1.911700 | 2.755400  |
| H    | 6.308100  | -0.943100 | 4.091300  |
| H    | 7.381900  | -1.533200 | 2.814400  |
| C    | 7.205400  | 1.199200  | 2.647700  |
| H    | 7.042100  | 1.467600  | 3.692200  |
| H    | 7.136200  | 2.105000  | 2.044300  |
| H    | 8.222000  | 0.810400  | 2.567400  |
| C    | 3.864700  | -1.614000 | -1.961900 |
| H    | 3.072500  | -1.753900 | -1.225300 |
| C    | 4.232800  | -3.003400 | -2.489100 |
| H    | 4.608900  | -3.638300 | -1.686200 |
| H    | 5.003700  | -2.940100 | -3.259900 |
| H    | 3.357000  | -3.484000 | -2.929000 |
| C    | 3.326200  | -0.740500 | -3.096600 |
| H    | 2.470100  | -1.221300 | -3.572800 |
| H    | 4.089700  | -0.585800 | -3.861900 |
| H    | 3.011800  | 0.242300  | -2.739800 |
| C    | -5.515600 | -3.205500 | 2.968100  |
| H    | -5.889300 | -2.747200 | 3.884600  |
| H    | -4.642400 | -3.809700 | 3.219000  |
| H    | -6.297100 | -3.871500 | 2.597400  |
| 92   |           |           |           |
| 8-Sb |           |           |           |
| H    | 4.284300  | -0.270100 | -0.648100 |
| O    | 1.201900  | 4.742100  | 0.603600  |
| N    | 3.379600  | -0.697100 | -0.517200 |
| C    | -0.224300 | 0.256300  | -0.677900 |
| O    | 3.113700  | 4.342600  | -0.484800 |



|   |           |           |           |
|---|-----------|-----------|-----------|
| H | -4.130000 | -0.524400 | -1.915500 |
| N | -3.898100 | -0.704700 | -0.950500 |
| C | 1.024000  | -0.349000 | -0.960400 |
| O | 3.986600  | 2.483300  | 1.385100  |
| C | 1.031500  | -1.580600 | -1.661900 |
| H | 1.971000  | -2.006600 | -1.979600 |
| C | -0.131900 | -2.232700 | -1.963100 |
| H | -0.100800 | -3.167500 | -2.507600 |
| O | 4.967300  | 1.584800  | -0.406600 |
| C | -1.361500 | -1.698600 | -1.560300 |
| H | -2.280900 | -2.237600 | -1.745000 |
| C | -1.417200 | -0.468200 | -0.949100 |
| C | 2.318300  | 0.185600  | -0.552400 |
| C | 3.399700  | -2.037200 | -0.052700 |
| C | 2.683600  | -2.450400 | 1.081000  |
| C | 2.757400  | -3.794700 | 1.445100  |
| H | 2.200000  | -4.132000 | 2.311000  |
| C | 3.537600  | -4.697000 | 0.748400  |
| H | 3.582300  | -5.733100 | 1.058300  |
| C | 4.269600  | -4.262800 | -0.347000 |
| H | 4.882900  | -4.969400 | -0.890200 |
| C | 4.207400  | -2.943100 | -0.770300 |
| C | 1.870300  | -1.521700 | 1.965200  |
| H | 1.940400  | -0.504900 | 1.585000  |
| C | 0.389400  | -1.913200 | 1.982500  |
| H | -0.013600 | -2.015500 | 0.973600  |
| H | -0.192600 | -1.154200 | 2.509800  |
| H | 0.247300  | -2.865200 | 2.500000  |
| C | 2.434500  | -1.490400 | 3.388400  |
| H | 2.363700  | -2.470800 | 3.863100  |
| H | 1.871700  | -0.781200 | 3.998100  |
| H | 3.482800  | -1.188600 | 3.388500  |
| C | 5.003800  | -2.465800 | -1.968700 |
| H | 4.411000  | -1.692300 | -2.465500 |
| C | 6.326100  | -1.830800 | -1.518100 |
| H | 6.949700  | -2.586300 | -1.034900 |
| H | 6.184100  | -1.016400 | -0.805400 |
| H | 6.871000  | -1.431800 | -2.375200 |
| C | 1.600200  | 2.534000  | -0.099900 |
| C | 2.563800  | 1.515500  | -0.208600 |
| C | 3.965800  | 1.865300  | 0.206000  |
| C | 5.255800  | 3.001900  | 1.784600  |
| H | 5.985900  | 2.198900  | 1.869100  |
| H | 5.092800  | 3.474200  | 2.748300  |
| H | 5.597700  | 3.730500  | 1.050000  |
| C | 2.081100  | 3.935800  | -0.012300 |
| C | 1.543000  | 6.127200  | 0.622700  |
| H | 2.489500  | 6.274400  | 1.140400  |
| H | 0.736000  | 6.624700  | 1.151500  |
| H | 1.628800  | 6.509500  | -0.393600 |

|      |           |           |           |
|------|-----------|-----------|-----------|
| C    | -2.760700 | 0.109100  | -0.542200 |
| H    | -2.788100 | 0.207200  | 0.546500  |
| H    | -2.856300 | 1.130000  | -0.937200 |
| C    | -5.044100 | -0.670000 | -0.114900 |
| C    | -6.227400 | -0.036500 | -0.540500 |
| C    | -7.335300 | -0.059600 | 0.299600  |
| H    | -8.253900 | 0.420400  | -0.010900 |
| C    | -7.280000 | -0.668800 | 1.543600  |
| H    | -8.149000 | -0.666500 | 2.188900  |
| C    | -6.108500 | -1.281700 | 1.951400  |
| H    | -6.071600 | -1.770600 | 2.918200  |
| C    | -4.982300 | -1.307300 | 1.134100  |
| C    | -6.296600 | 0.622500  | -1.906000 |
| H    | -5.325100 | 1.090100  | -2.096300 |
| C    | -6.551600 | -0.426200 | -2.996200 |
| H    | -5.823000 | -1.238600 | -2.970800 |
| H    | -6.524900 | 0.029500  | -3.987600 |
| H    | -7.537900 | -0.871900 | -2.850200 |
| C    | -7.341600 | 1.730700  | -2.003900 |
| H    | -7.238800 | 2.249300  | -2.958000 |
| H    | -7.228700 | 2.460600  | -1.201500 |
| H    | -8.354900 | 1.328000  | -1.961100 |
| C    | -3.754300 | -2.074000 | 1.593600  |
| H    | -2.977800 | -1.979200 | 0.834100  |
| C    | -4.072300 | -3.566200 | 1.719600  |
| H    | -4.452900 | -3.963300 | 0.777600  |
| H    | -4.826400 | -3.741700 | 2.489500  |
| H    | -3.174100 | -4.123700 | 1.992300  |
| C    | -3.203800 | -1.529700 | 2.912600  |
| H    | -2.322300 | -2.095900 | 3.217100  |
| H    | -3.945700 | -1.611200 | 3.709500  |
| H    | -2.922400 | -0.477800 | 2.827100  |
| C    | 5.282300  | -3.561600 | -2.994200 |
| H    | 5.717500  | -3.122000 | -3.892400 |
| H    | 4.369700  | -4.088200 | -3.277200 |
| H    | 5.995800  | -4.294900 | -2.613600 |
| Sb   | -0.404000 | 2.271800  | -0.088300 |
| 92   |           |           |           |
| 9-As |           |           |           |
| As   | 1.169800  | -0.099700 | 0.592400  |
| H    | -3.463100 | -1.015500 | 1.318500  |
| O    | 1.796500  | -2.892800 | -1.189600 |
| N    | -3.108500 | -0.405900 | 0.586200  |
| C    | 0.050700  | 0.383100  | -0.904500 |
| O    | -0.330200 | -2.645000 | -1.835900 |
| N    | 2.585100  | 0.277900  | -0.547000 |
| C    | -1.293400 | 0.055800  | -0.963200 |
| C    | -1.989500 | 0.301800  | -2.138900 |
| H    | -3.037900 | 0.046700  | -2.223300 |
| O    | -0.752500 | -3.263200 | 2.493900  |

|   |           |           |           |
|---|-----------|-----------|-----------|
| C | -1.316200 | 0.840500  | -3.233000 |
| H | -1.861100 | 1.033200  | -4.147800 |
| O | -2.750700 | -2.284300 | 2.391900  |
| C | 0.051600  | 1.073200  | -3.188000 |
| H | 0.572700  | 1.420300  | -4.072700 |
| C | 0.751900  | 0.818100  | -2.011400 |
| C | -1.853700 | -0.690100 | 0.196600  |
| C | -3.498900 | 2.011100  | 0.347900  |
| C | -3.920000 | 0.688200  | 0.169700  |
| C | -4.350900 | 3.027500  | -0.081700 |
| H | -4.043400 | 4.059000  | 0.040700  |
| C | -5.581900 | 2.746000  | -0.643700 |
| H | -6.228000 | 3.552400  | -0.966400 |
| C | -5.990700 | 1.428200  | -0.789700 |
| H | -6.955300 | 1.218400  | -1.232600 |
| C | -5.170800 | 0.380200  | -0.392700 |
| C | -2.193500 | 2.390500  | 1.021700  |
| H | -1.629800 | 1.484500  | 1.239800  |
| C | -1.329000 | 3.282900  | 0.126500  |
| H | -0.341600 | 3.417100  | 0.575400  |
| H | -1.777900 | 4.271900  | 0.012100  |
| H | -1.198800 | 2.850300  | -0.866700 |
| C | -2.463500 | 3.076300  | 2.364100  |
| H | -3.054300 | 2.435900  | 3.020100  |
| H | -3.009500 | 4.010800  | 2.220300  |
| H | -1.520900 | 3.307700  | 2.864100  |
| C | -5.603200 | -1.064900 | -0.541600 |
| H | -4.705500 | -1.651200 | -0.756100 |
| C | -6.587600 | -1.290600 | -1.685700 |
| H | -6.218600 | -0.868500 | -2.621700 |
| H | -7.562200 | -0.847800 | -1.471100 |
| H | -6.742100 | -2.360500 | -1.830600 |
| C | -6.201100 | -1.582300 | 0.772400  |
| H | -6.481000 | -2.632500 | 0.675700  |
| H | -7.096500 | -1.009400 | 1.023800  |
| H | -5.505500 | -1.498200 | 1.608500  |
| C | -1.068700 | -1.659100 | 0.813600  |
| C | 0.347700  | -1.961700 | 0.380500  |
| H | 0.838100  | -2.613600 | 1.095700  |
| C | 0.518100  | -2.532800 | -0.990100 |
| C | 2.111900  | -3.378100 | -2.490000 |
| H | 3.170100  | -3.626600 | -2.465100 |
| H | 1.919600  | -2.608700 | -3.238200 |
| H | 1.519100  | -4.260700 | -2.726300 |
| C | -1.618100 | -2.394900 | 1.942600  |
| C | -1.247400 | -4.014800 | 3.598300  |
| H | -0.426400 | -4.653100 | 3.910800  |
| H | -2.104800 | -4.615000 | 3.297800  |
| H | -1.544800 | -3.351300 | 4.409100  |
| C | 2.248800  | 0.849800  | -1.853400 |

|   |          |           |           |
|---|----------|-----------|-----------|
| H | 2.719200 | 0.282800  | -2.667700 |
| H | 2.635200 | 1.874700  | -1.922200 |
| C | 3.838300 | 0.687400  | 0.002900  |
| C | 3.981500 | 1.973500  | 0.553300  |
| C | 5.219000 | 2.340000  | 1.076300  |
| H | 5.343100 | 3.325000  | 1.511400  |
| C | 6.291500 | 1.465500  | 1.056000  |
| H | 7.245500 | 1.767900  | 1.469200  |
| C | 6.142200 | 0.203500  | 0.502900  |
| H | 6.987300 | -0.472900 | 0.488500  |
| C | 4.924500 | -0.202300 | -0.033300 |
| C | 2.838700 | 2.971600  | 0.613000  |
| H | 1.966200 | 2.537700  | 0.119900  |
| C | 2.446300 | 3.269000  | 2.062600  |
| H | 2.165800 | 2.356000  | 2.589300  |
| H | 1.601700 | 3.960400  | 2.095500  |
| H | 3.277400 | 3.730300  | 2.600200  |
| C | 3.181100 | 4.267100  | -0.126100 |
| H | 4.004800 | 4.790500  | 0.362900  |
| H | 2.317800 | 4.935100  | -0.134400 |
| H | 3.474700 | 4.070800  | -1.158400 |
| C | 4.749700 | -1.595800 | -0.598700 |
| H | 3.917200 | -1.552500 | -1.302100 |
| C | 4.355300 | -2.562100 | 0.520800  |
| H | 4.175800 | -3.562700 | 0.122900  |
| H | 3.443100 | -2.232300 | 1.021400  |
| H | 5.153200 | -2.620100 | 1.265500  |
| C | 5.983400 | -2.110900 | -1.336600 |
| H | 6.812000 | -2.305800 | -0.653100 |
| H | 6.325900 | -1.400300 | -2.090500 |
| H | 5.750900 | -3.053900 | -1.835000 |

92

9-Sb

|   |           |           |           |
|---|-----------|-----------|-----------|
| H | 3.667500  | -0.906000 | -1.263100 |
| O | -1.543700 | -2.967300 | 1.132800  |
| N | 3.264200  | -0.319800 | -0.537200 |
| C | 0.040300  | 0.413600  | 0.837600  |
| O | 0.573200  | -2.651000 | 1.782800  |
| N | -2.605200 | 0.348600  | 0.518000  |
| C | 1.380100  | 0.068800  | 0.945200  |
| C | 2.040700  | 0.283000  | 2.147300  |
| H | 3.080600  | 0.005800  | 2.262500  |
| O | 1.069100  | -3.150100 | -2.651400 |
| C | 1.340700  | 0.812900  | 3.227700  |
| H | 1.856000  | 0.980800  | 4.164400  |
| O | 3.034500  | -2.127300 | -2.430800 |
| C | -0.019600 | 1.065700  | 3.136800  |
| H | -0.567100 | 1.407000  | 4.008300  |
| C | -0.688400 | 0.840300  | 1.933900  |
| C | 2.005700  | -0.651800 | -0.200200 |

|   |           |           |           |
|---|-----------|-----------|-----------|
| C | 3.613000  | 2.099700  | -0.266100 |
| C | 4.036200  | 0.781600  | -0.066100 |
| C | 4.428700  | 3.124800  | 0.210400  |
| H | 4.118800  | 4.153300  | 0.070200  |
| C | 5.627500  | 2.854500  | 0.843400  |
| H | 6.246700  | 3.666800  | 1.202200  |
| C | 6.037800  | 1.540400  | 1.016500  |
| H | 6.974900  | 1.338700  | 1.518100  |
| C | 5.252800  | 0.485000  | 0.571800  |
| C | 2.339600  | 2.462200  | -1.005500 |
| H | 1.803800  | 1.546200  | -1.251600 |
| C | 1.419200  | 3.336000  | -0.148800 |
| H | 0.449700  | 3.455500  | -0.638900 |
| H | 1.845700  | 4.332000  | -0.012000 |
| H | 1.255100  | 2.895700  | 0.836200  |
| C | 2.666500  | 3.156200  | -2.330700 |
| H | 3.289900  | 2.522300  | -2.962400 |
| H | 3.200600  | 4.092400  | -2.157200 |
| H | 1.747300  | 3.387000  | -2.872400 |
| C | 5.684400  | -0.956500 | 0.755500  |
| H | 4.777700  | -1.548500 | 0.909500  |
| C | 6.587500  | -1.169800 | 1.967100  |
| H | 6.153100  | -0.742100 | 2.872000  |
| H | 7.573000  | -0.724500 | 1.817600  |
| H | 6.735300  | -2.237900 | 2.130700  |
| C | 6.375500  | -1.475800 | -0.510700 |
| H | 6.658500  | -2.522400 | -0.386900 |
| H | 7.280700  | -0.896100 | -0.705100 |
| H | 5.737000  | -1.404700 | -1.392300 |
| C | 1.286900  | -1.644200 | -0.867200 |
| C | -0.100400 | -2.071700 | -0.460400 |
| H | -0.511200 | -2.794600 | -1.156600 |
| C | -0.268900 | -2.585200 | 0.924900  |
| C | -1.846500 | -3.431000 | 2.443400  |
| H | -2.900400 | -3.697900 | 2.427500  |
| H | -1.665900 | -2.643800 | 3.175900  |
| H | -1.238400 | -4.298700 | 2.696000  |
| C | 1.894600  | -2.296300 | -2.020200 |
| C | 1.618100  | -3.820000 | -3.782600 |
| H | 0.827300  | -4.463700 | -4.156100 |
| H | 2.485400  | -4.410800 | -3.491900 |
| H | 1.917000  | -3.101000 | -4.544100 |
| C | -2.188100 | 0.926500  | 1.792100  |
| H | -2.655500 | 0.399000  | 2.635800  |
| H | -2.523700 | 1.971300  | 1.862900  |
| C | -3.941700 | 0.642000  | 0.127000  |
| C | -4.259100 | 1.898400  | -0.422400 |
| C | -5.574700 | 2.152800  | -0.800300 |
| H | -5.828100 | 3.114400  | -1.231700 |
| C | -6.562500 | 1.195800  | -0.642600 |

|    |           |           |           |
|----|-----------|-----------|-----------|
| H  | -7.579800 | 1.409700  | -0.945600 |
| C  | -6.244300 | -0.036300 | -0.094600 |
| H  | -7.021800 | -0.780100 | 0.027100  |
| C  | -4.943900 | -0.329400 | 0.303100  |
| C  | -3.211600 | 2.974800  | -0.641500 |
| H  | -2.263900 | 2.622200  | -0.229800 |
| C  | -2.997600 | 3.234700  | -2.135000 |
| H  | -2.713500 | 2.320200  | -2.658400 |
| H  | -2.210900 | 3.977000  | -2.285100 |
| H  | -3.911800 | 3.614700  | -2.595900 |
| C  | -3.572400 | 4.273000  | 0.083000  |
| H  | -4.485500 | 4.709300  | -0.326500 |
| H  | -2.772200 | 5.006300  | -0.031700 |
| H  | -3.732600 | 4.101000  | 1.148500  |
| C  | -4.599900 | -1.692400 | 0.867300  |
| H  | -3.681100 | -1.579000 | 1.443900  |
| C  | -4.309300 | -2.669800 | -0.274600 |
| H  | -4.028600 | -3.650900 | 0.113500  |
| H  | -3.488400 | -2.315800 | -0.901800 |
| H  | -5.194100 | -2.783900 | -0.905900 |
| C  | -5.682400 | -2.256900 | 1.785100  |
| H  | -6.586900 | -2.516900 | 1.232300  |
| H  | -5.954300 | -1.545800 | 2.566500  |
| H  | -5.326100 | -3.171600 | 2.263100  |
| Sb | -1.147100 | -0.128300 | -0.829600 |

92

10\_Sb

|   |           |           |           |
|---|-----------|-----------|-----------|
| O | -0.031100 | -2.905200 | 1.201300  |
| N | -2.556300 | 0.172400  | -0.621900 |
| C | -0.310800 | -1.360300 | -1.484700 |
| O | -2.062700 | -2.037200 | 1.584500  |
| N | 2.128400  | -0.597500 | -0.696600 |
| C | -1.615400 | -1.625200 | -1.900800 |
| C | -1.878800 | -2.741000 | -2.690900 |
| H | -2.891400 | -2.942600 | -3.021900 |
| O | 1.722900  | 1.413400  | 1.885000  |
| C | -0.841700 | -3.598800 | -3.039800 |
| H | -1.046000 | -4.470100 | -3.648600 |
| O | 1.219800  | 1.591400  | 4.059300  |
| C | 0.451900  | -3.344400 | -2.607800 |
| H | 1.255200  | -4.021200 | -2.877700 |
| C | 0.724400  | -2.216100 | -1.833500 |
| C | -2.717000 | -0.747600 | -1.481200 |
| C | -3.602800 | 2.327900  | -0.273200 |
| C | -3.688800 | 0.923800  | -0.209200 |
| C | -4.706400 | 3.081100  | 0.101400  |
| H | -4.660400 | 4.160900  | 0.042000  |
| C | -5.867000 | 2.473200  | 0.556200  |
| H | -6.720800 | 3.074000  | 0.842000  |
| C | -5.919300 | 1.096800  | 0.658400  |

|   |           |           |           |
|---|-----------|-----------|-----------|
| H | -6.817600 | 0.626800  | 1.040500  |
| C | -4.842400 | 0.291000  | 0.288700  |
| C | -2.314500 | 3.013500  | -0.681000 |
| H | -1.739600 | 2.317100  | -1.291500 |
| C | -2.526700 | 4.274900  | -1.516300 |
| H | -1.565400 | 4.641800  | -1.879800 |
| H | -2.979400 | 5.077500  | -0.931900 |
| H | -3.167000 | 4.077900  | -2.377300 |
| C | -1.499600 | 3.335200  | 0.576500  |
| H | -1.367100 | 2.449400  | 1.201800  |
| H | -2.020900 | 4.087000  | 1.174100  |
| H | -0.512900 | 3.723000  | 0.312600  |
| C | -4.968200 | -1.207900 | 0.507800  |
| H | -4.016200 | -1.683800 | 0.284400  |
| C | -6.043700 | -1.818500 | -0.393800 |
| H | -5.836300 | -1.641200 | -1.450900 |
| H | -7.024000 | -1.389100 | -0.176300 |
| H | -6.106700 | -2.896300 | -0.232500 |
| C | -5.259000 | -1.520900 | 1.977600  |
| H | -5.260800 | -2.601200 | 2.132800  |
| H | -6.232600 | -1.135000 | 2.286000  |
| H | -4.492300 | -1.087900 | 2.619400  |
| C | 0.236300  | -0.162900 | 2.787700  |
| C | -0.123300 | -0.627200 | 1.595100  |
| C | -0.870800 | -1.903000 | 1.490700  |
| C | -0.648900 | -4.132100 | 0.808200  |
| H | 0.165300  | -4.817500 | 0.591800  |
| H | -1.253600 | -3.965800 | -0.084900 |
| H | -1.275800 | -4.519300 | 1.609500  |
| C | 1.079700  | 1.039600  | 3.000500  |
| C | 2.644200  | 2.500000  | 1.999100  |
| H | 3.134600  | 2.570100  | 1.030700  |
| H | 3.375000  | 2.282900  | 2.777100  |
| H | 2.112000  | 3.418300  | 2.242900  |
| C | 2.112500  | -1.903500 | -1.325900 |
| H | 2.410400  | -2.708000 | -0.636000 |
| H | 2.824700  | -1.928000 | -2.162300 |
| C | 3.377900  | 0.009800  | -0.420600 |
| C | 3.858900  | 1.028500  | -1.266100 |
| C | 5.049000  | 1.676000  | -0.938600 |
| H | 5.414900  | 2.471700  | -1.577200 |
| C | 5.773900  | 1.317600  | 0.183900  |
| H | 6.697000  | 1.830200  | 0.423600  |
| C | 5.313200  | 0.292600  | 0.996600  |
| H | 5.887500  | 0.009500  | 1.871100  |
| C | 4.122200  | -0.368000 | 0.716300  |
| C | 3.121500  | 1.452600  | -2.522100 |
| H | 2.287800  | 0.763900  | -2.667700 |
| C | 2.559100  | 2.869600  | -2.379300 |
| H | 1.901800  | 2.951500  | -1.511100 |

|    |           |           |           |
|----|-----------|-----------|-----------|
| H  | 1.988600  | 3.149100  | -3.267200 |
| H  | 3.368900  | 3.592800  | -2.257100 |
| C  | 4.015600  | 1.356300  | -3.760400 |
| H  | 4.849400  | 2.058400  | -3.702400 |
| H  | 3.443000  | 1.595100  | -4.658400 |
| H  | 4.427800  | 0.352500  | -3.870800 |
| C  | 3.653800  | -1.490300 | 1.619400  |
| H  | 2.604000  | -1.682800 | 1.388300  |
| C  | 3.751900  | -1.139900 | 3.105200  |
| H  | 3.233500  | -1.892800 | 3.701700  |
| H  | 3.310900  | -0.167400 | 3.325100  |
| H  | 4.790600  | -1.114600 | 3.441400  |
| C  | 4.457200  | -2.766300 | 1.341700  |
| H  | 5.507500  | -2.611300 | 1.600600  |
| H  | 4.415200  | -3.049200 | 0.289300  |
| H  | 4.078800  | -3.597400 | 1.940300  |
| Sb | 0.335300  | 0.325300  | -0.348800 |
| H  | -0.046600 | -0.655400 | 3.713300  |
| H  | -3.695500 | -0.935300 | -1.933800 |

92

11\_As (isomer 1)

|   |           |           |           |
|---|-----------|-----------|-----------|
| O | -5.296100 | -0.193700 | -0.387700 |
| N | -1.356600 | -0.495100 | 0.015500  |
| C | 0.520100  | 0.715300  | -1.151800 |
| O | -3.956100 | -1.004100 | -1.988900 |
| N | 3.209200  | 0.365500  | -0.208700 |
| C | -0.782800 | 1.207700  | -1.427900 |
| O | -3.427500 | 4.397200  | -0.703900 |
| C | -0.961100 | 2.266800  | -2.351200 |
| H | -1.958000 | 2.621200  | -2.585300 |
| C | 0.129000  | 2.822200  | -2.955000 |
| H | 0.004500  | 3.631000  | -3.663000 |
| O | -1.951600 | 3.297500  | 0.568300  |
| C | 1.429600  | 2.333300  | -2.681300 |
| H | 2.279700  | 2.782200  | -3.182700 |
| C | 1.633700  | 1.288600  | -1.819700 |
| C | -1.800500 | 0.527300  | -0.726200 |
| C | -2.725100 | -0.725600 | 2.028200  |
| C | -2.241000 | -1.279200 | 0.834600  |
| C | -3.601000 | -1.491300 | 2.793000  |
| H | -3.984500 | -1.087800 | 3.721800  |
| C | -3.979600 | -2.759700 | 2.390200  |
| H | -4.662800 | -3.340500 | 2.997200  |
| C | -3.472600 | -3.293300 | 1.216500  |
| H | -3.763400 | -4.292200 | 0.917900  |
| C | -2.591900 | -2.572800 | 0.414700  |
| C | -2.278400 | 0.631100  | 2.533800  |
| H | -1.757200 | 1.155600  | 1.734500  |
| C | -3.454800 | 1.508300  | 2.963100  |
| H | -3.098500 | 2.515600  | 3.183200  |



|   |           |           |           |
|---|-----------|-----------|-----------|
| H | -3.936300 | 1.120300  | 3.862900  |
| H | -4.208700 | 1.573300  | 2.176200  |
| C | -1.291200 | 0.450800  | 3.691100  |
| H | -0.427700 | -0.139300 | 3.379900  |
| H | -1.770800 | -0.060100 | 4.529400  |
| H | -0.936600 | 1.422300  | 4.039700  |
| C | -2.015100 | -3.213100 | -0.833300 |
| H | -1.637600 | -2.418000 | -1.478000 |
| C | -3.049700 | -4.008300 | -1.631300 |
| H | -3.927200 | -3.404800 | -1.857300 |
| H | -3.362600 | -4.906700 | -1.095800 |
| H | -2.607700 | -4.333100 | -2.574600 |
| C | -0.848900 | -4.133100 | -0.451700 |
| H | -0.401100 | -4.565200 | -1.348900 |
| H | -1.208700 | -4.950300 | 0.178300  |
| H | -0.071700 | -3.599400 | 0.095000  |
| C | -3.227200 | 0.882600  | -0.736200 |
| C | -3.721500 | 2.105000  | -0.531600 |
| H | -4.784400 | 2.279600  | -0.645100 |
| C | -2.913000 | 3.294300  | -0.151500 |
| C | -2.726600 | 5.609200  | -0.414500 |
| H | -1.696300 | 5.535000  | -0.760100 |
| H | -2.732700 | 5.799100  | 0.657600  |
| H | -3.256400 | 6.392900  | -0.946200 |
| C | -4.181900 | -0.214400 | -1.112500 |
| C | -6.225500 | -1.244500 | -0.667800 |
| H | -6.578200 | -1.173700 | -1.695500 |
| H | -7.043800 | -1.108300 | 0.032000  |
| H | -5.742200 | -2.208500 | -0.511000 |
| C | 3.006200  | 0.705500  | -1.618600 |
| H | 3.096900  | -0.207900 | -2.212000 |
| C | 4.495100  | -0.126300 | 0.145600  |
| C | 4.870000  | -1.415400 | -0.261800 |
| C | 6.149900  | -1.868100 | 0.047500  |
| H | 6.451400  | -2.857900 | -0.275100 |
| C | 7.028000  | -1.093300 | 0.781400  |
| H | 8.017200  | -1.462800 | 1.019400  |
| C | 6.621000  | 0.151300  | 1.238800  |
| H | 7.300700  | 0.734800  | 1.844300  |
| C | 5.363800  | 0.658500  | 0.933400  |
| C | 3.909600  | -2.358200 | -0.962700 |
| H | 2.949800  | -1.855700 | -1.068000 |
| C | 4.407000  | -2.748400 | -2.355400 |
| H | 4.590700  | -1.869100 | -2.975400 |
| H | 3.672700  | -3.378800 | -2.860000 |
| H | 5.342100  | -3.308900 | -2.291100 |
| C | 3.651300  | -3.602500 | -0.109500 |
| H | 4.565300  | -4.182500 | 0.033400  |
| H | 2.915000  | -4.245600 | -0.595500 |
| H | 3.267700  | -3.324000 | 0.873200  |

|    |          |           |           |
|----|----------|-----------|-----------|
| C  | 4.939200 | 2.028400  | 1.442600  |
| H  | 3.912200 | 1.947500  | 1.814500  |
| C  | 4.963200 | 3.076300  | 0.324000  |
| H  | 4.657200 | 4.050500  | 0.709200  |
| H  | 4.300400 | 2.819700  | -0.501800 |
| H  | 5.975900 | 3.167800  | -0.074200 |
| C  | 5.772000 | 2.527300  | 2.621000  |
| H  | 6.788300 | 2.778800  | 2.311500  |
| H  | 5.830000 | 1.785100  | 3.417900  |
| H  | 5.322000 | 3.433400  | 3.028200  |
| As | 0.511300 | -0.689500 | 0.092100  |
| H  | 3.767700 | 1.400000  | -1.993500 |
| H  | 2.959800 | 1.166600  | 0.356300  |

92

11\_As (isomer 2)

|   |           |           |           |
|---|-----------|-----------|-----------|
| O | -5.418200 | -0.059200 | -1.302700 |
| N | -1.784800 | -0.546600 | 0.297400  |
| C | 0.454400  | 0.317200  | -0.481000 |
| O | -3.762500 | -1.228600 | -2.255000 |
| N | 4.186500  | 0.260200  | -0.844200 |
| C | -0.669800 | 0.851200  | -1.162000 |
| O | -3.050400 | 4.271400  | -1.676000 |
| C | -0.481400 | 1.751400  | -2.239900 |
| H | -1.335300 | 2.128500  | -2.790100 |
| C | 0.785000  | 2.114500  | -2.591900 |
| H | 0.942700  | 2.796800  | -3.417000 |
| O | -2.106600 | 3.320700  | 0.116800  |
| C | 1.908500  | 1.598900  | -1.898300 |
| H | 2.904300  | 1.905700  | -2.191300 |
| C | 1.762200  | 0.711600  | -0.865400 |
| C | -1.901100 | 0.367700  | -0.676800 |
| C | -3.660400 | -0.332600 | 1.847400  |
| C | -2.939500 | -1.120000 | 0.939100  |
| C | -4.799400 | -0.885900 | 2.426000  |
| H | -5.372600 | -0.299000 | 3.132700  |
| C | -5.203700 | -2.172800 | 2.118500  |
| H | -6.094400 | -2.585200 | 2.575300  |
| C | -4.460900 | -2.939900 | 1.235900  |
| H | -4.776700 | -3.951500 | 1.015200  |
| C | -3.312800 | -2.438100 | 0.629100  |
| C | -3.204500 | 1.050300  | 2.265300  |
| H | -2.442400 | 1.401200  | 1.571800  |
| C | -4.340900 | 2.072400  | 2.242800  |
| H | -3.934600 | 3.072900  | 2.395400  |
| H | -5.069300 | 1.883300  | 3.033900  |
| H | -4.868200 | 2.057100  | 1.287000  |
| C | -2.567200 | 0.982200  | 3.656700  |
| H | -1.716200 | 0.299200  | 3.664000  |
| H | -3.293000 | 0.633700  | 4.395200  |
| H | -2.216500 | 1.970400  | 3.959200  |

|   |           |           |           |
|---|-----------|-----------|-----------|
| C | -2.494100 | -3.330400 | -0.283400 |
| H | -1.855500 | -2.693500 | -0.897100 |
| C | -3.350900 | -4.176100 | -1.226200 |
| H | -4.054400 | -3.560200 | -1.783400 |
| H | -3.901700 | -4.947000 | -0.684000 |
| H | -2.703700 | -4.686100 | -1.941500 |
| C | -1.604200 | -4.251200 | 0.560900  |
| H | -0.977500 | -4.867800 | -0.086100 |
| H | -2.223000 | -4.914300 | 1.170200  |
| H | -0.954000 | -3.687600 | 1.229500  |
| C | -3.228800 | 0.801600  | -1.138000 |
| C | -3.629100 | 2.068800  | -1.254000 |
| H | -4.597000 | 2.285900  | -1.688900 |
| C | -2.830100 | 3.253900  | -0.839100 |
| C | -2.322400 | 5.468400  | -1.389200 |
| H | -1.252700 | 5.264500  | -1.398500 |
| H | -2.606700 | 5.854500  | -0.411600 |
| H | -2.588500 | 6.171300  | -2.172100 |
| C | -4.148200 | -0.281900 | -1.624000 |
| C | -6.340800 | -1.071600 | -1.716500 |
| H | -6.329300 | -1.173100 | -2.800400 |
| H | -7.314500 | -0.741800 | -1.369200 |
| H | -6.070700 | -2.021800 | -1.256400 |
| C | 2.936500  | 0.157000  | -0.102600 |
| H | 3.036000  | 0.699100  | 0.839600  |
| C | 5.370000  | -0.068600 | -0.135700 |
| C | 5.809100  | 0.792600  | 0.883000  |
| C | 6.939600  | 0.441000  | 1.615200  |
| H | 7.275800  | 1.091300  | 2.414700  |
| C | 7.659700  | -0.702100 | 1.320700  |
| H | 8.540300  | -0.958400 | 1.895500  |
| C | 7.263600  | -1.501600 | 0.259300  |
| H | 7.856200  | -2.371700 | 0.010800  |
| C | 6.123200  | -1.210300 | -0.480800 |
| C | 5.143300  | 2.129700  | 1.157400  |
| H | 4.334000  | 2.261300  | 0.439300  |
| C | 4.567600  | 2.207500  | 2.573000  |
| H | 3.858600  | 1.401700  | 2.769500  |
| H | 4.055600  | 3.159200  | 2.725400  |
| H | 5.364100  | 2.133400  | 3.316500  |
| C | 6.131100  | 3.276800  | 0.923700  |
| H | 6.962400  | 3.230400  | 1.629700  |
| H | 5.632200  | 4.238600  | 1.055800  |
| H | 6.542700  | 3.236400  | -0.085500 |
| C | 5.698100  | -2.108600 | -1.632300 |
| H | 5.388000  | -1.468500 | -2.465300 |
| C | 4.509700  | -2.993200 | -1.238800 |
| H | 4.209700  | -3.625300 | -2.076500 |
| H | 3.643300  | -2.410400 | -0.928800 |
| H | 4.793000  | -3.639700 | -0.405600 |

|    |           |           |           |
|----|-----------|-----------|-----------|
| C  | 6.824900  | -2.984800 | -2.174100 |
| H  | 7.104600  | -3.760100 | -1.458500 |
| H  | 7.713800  | -2.399300 | -2.411600 |
| H  | 6.491300  | -3.486600 | -3.083200 |
| As | -0.042700 | -0.887200 | 0.864800  |
| H  | 2.714800  | -0.884400 | 0.179600  |
| H  | 4.107600  | -0.268200 | -1.701500 |
